# Supplementary material for: Physicochemical characterization of high-quality bacterial cellulose produced by Komagataeibacter sp. strain W1 and identification of the associated genes in bacterial cellulose production
Source: Royal Society of Chemistry journal article supplement (doi:10.1039/c7ra08391b), 2017-01-01
Supplement: c7ra08391b1.pdf [file c7ra08391b1.pdf]

**Table S1-Sequence data**

| Sample                      | W1        |
|-----------------------------|-----------|
| Insert length (bp)          | 490       |
| Raw data pair reads         | 3198364*2 |
| Raw data total bases (bp)   | 1.606E+09 |
| Raw data Q20 (%)            | 89.47     |
| Clean data pair reads       | 2863635*2 |
| Clean data single reads     | 319947    |
| Clean data total bases (bp) | 1.317E+09 |
| Clean data Q20 (%)          | 96.78     |
| Average coverage (X)        | 346X      |

**Table S2-Assembly data**

| Sample                                 | W1      |
|----------------------------------------|---------|
| No. of all scaffolds (#)               | 168     |
| Bases in all scaffolds (bp)            | 3798604 |
| No. of large scaffolds (#,>1000 bp)    | 122     |
| Bases in large scaffolds (bp,>1000 bp) | 3772045 |
| Largest scaffold length (bp)           | 507766  |
| Scaffold N50 (bp)                      | 134141  |
| Scaffold N90 (bp)                      | 14460   |
| G+C content (%)                        | 61.47   |
| N rate (%)                             | 0.00803 |
| No. of all contigs (#)                 | 285     |
| Bases in all contigs (bp)              | 3798299 |
| No. of large contigs (#,>1000 bp)      | 149     |
| Bases in large contigs (bp,>1000 bp)   | 3735623 |
| Largest contig length (bp)             | 365732  |
| Contig N50 (bp)                        | 79645   |
| Contig N90 (bp)                        | 9963    |

**Table S3-Gene information**

| Sample                              | W1      |
|-------------------------------------|---------|
| Gene num (#)                        | 3705    |
| Gene total length (bp)              | 3177675 |
| Gene average length (bp)            | 857.67  |
| Gene density (number/kb)            | 0.98    |
| GC content in gene region (%)       | 62.96   |
| Gene/Genome (%)                     | 83.65   |
| Intergenic region length (bp)       | 620929  |
| GC content in intergenic region (%) | 53.84   |
| Intergenic length/Genome (%)        | 16.35   |

**Table S4-Gene annotation**

[illegible]

[illegible]









[illegible]















[illegible]

































[illegible]

Table S5-KEEG pathway annotation

| #Query  | Ko id(Gene id) | Ko name(Gene name)    | hyperlink                                                                                                         | Paths                                                                         |
|---------|----------------|-----------------------|-------------------------------------------------------------------------------------------------------------------|-------------------------------------------------------------------------------|
| orf0003 | K01156         | res                   | <a href="http://www.genome.jp/dbget-bin/www_bget?ko:K01156">http://www.genome.jp/dbget-bin/www_bget?ko:K01156</a> |                                                                               |
| orf0004 | K07316         | mod                   | <a href="http://www.genome.jp/dbget-bin/www_bget?ko:K07316">http://www.genome.jp/dbget-bin/www_bget?ko:K07316</a> |                                                                               |
| orf0013 | K01951         | guaA, GMPS            | <a href="http://www.genome.jp/dbget-bin/www_bget?ko:K01951">http://www.genome.jp/dbget-bin/www_bget?ko:K01951</a> | path:ko00230;path:ko00983;path:ko01100                                        |
| orf0019 | K00384         | E1.8.1.9, trxB        | <a href="http://www.genome.jp/dbget-bin/www_bget?ko:K00384">http://www.genome.jp/dbget-bin/www_bget?ko:K00384</a> | path:ko00240;path:ko00450                                                     |
| orf0021 | K05788         | ihfB, himD            | <a href="http://www.genome.jp/dbget-bin/www_bget?ko:K05788">http://www.genome.jp/dbget-bin/www_bget?ko:K05788</a> |                                                                               |
| orf0022 | K04773         | sppA                  | <a href="http://www.genome.jp/dbget-bin/www_bget?ko:K04773">http://www.genome.jp/dbget-bin/www_bget?ko:K04773</a> |                                                                               |
| orf0026 | K07090         | K07090                | <a href="http://www.genome.jp/dbget-bin/www_bget?ko:K07090">http://www.genome.jp/dbget-bin/www_bget?ko:K07090</a> |                                                                               |
| orf0027 | K02334         | dpo                   | <a href="http://www.genome.jp/dbget-bin/www_bget?ko:K02334">http://www.genome.jp/dbget-bin/www_bget?ko:K02334</a> |                                                                               |
| orf0030 | K01487         | E3.5.4.3, guaD        | <a href="http://www.genome.jp/dbget-bin/www_bget?ko:K01487">http://www.genome.jp/dbget-bin/www_bget?ko:K01487</a> | path:ko00230;path:ko01100                                                     |
| orf0033 | K02888         | RP-L21, MRPL21, rplU  | <a href="http://www.genome.jp/dbget-bin/www_bget?ko:K02888">http://www.genome.jp/dbget-bin/www_bget?ko:K02888</a> | path:ko03010                                                                  |
| orf0034 | K02899         | RP-L27, MRPL27, rpmA  | <a href="http://www.genome.jp/dbget-bin/www_bget?ko:K02899">http://www.genome.jp/dbget-bin/www_bget?ko:K02899</a> | path:ko03010                                                                  |
| orf0036 | K03979         | obg                   | <a href="http://www.genome.jp/dbget-bin/www_bget?ko:K03979">http://www.genome.jp/dbget-bin/www_bget?ko:K03979</a> |                                                                               |
| orf0037 | K00931         | proB                  | <a href="http://www.genome.jp/dbget-bin/www_bget?ko:K00931">http://www.genome.jp/dbget-bin/www_bget?ko:K00931</a> | path:ko00330;path:ko01100;path:ko01230                                        |
| orf0040 | K00036         | G6PD, zwf             | <a href="http://www.genome.jp/dbget-bin/www_bget?ko:K00036">http://www.genome.jp/dbget-bin/www_bget?ko:K00036</a> | path:ko00030;path:ko00480;path:ko01100;path:ko01110;path:ko01120;path:ko01200 |
| orf0042 | K03925         | mraZ                  | <a href="http://www.genome.jp/dbget-bin/www_bget?ko:K03925">http://www.genome.jp/dbget-bin/www_bget?ko:K03925</a> |                                                                               |
| orf0043 | K03438         | mraW, rsmH            | <a href="http://www.genome.jp/dbget-bin/www_bget?ko:K03438">http://www.genome.jp/dbget-bin/www_bget?ko:K03438</a> |                                                                               |
| orf0045 | K03587         | ftsI                  | <a href="http://www.genome.jp/dbget-bin/www_bget?ko:K03587">http://www.genome.jp/dbget-bin/www_bget?ko:K03587</a> | path:ko00312;path:ko00550                                                     |
| orf0046 | K01928         | murE                  | <a href="http://www.genome.jp/dbget-bin/www_bget?ko:K01928">http://www.genome.jp/dbget-bin/www_bget?ko:K01928</a> | path:ko00300;path:ko00550                                                     |
| orf0047 | K01929         | murF                  | <a href="http://www.genome.jp/dbget-bin/www_bget?ko:K01929">http://www.genome.jp/dbget-bin/www_bget?ko:K01929</a> | path:ko00300;path:ko00550;path:ko01100                                        |
| orf0048 | K01000         | mraY                  | <a href="http://www.genome.jp/dbget-bin/www_bget?ko:K01000">http://www.genome.jp/dbget-bin/www_bget?ko:K01000</a> | path:ko00550;path:ko01100                                                     |
| orf0049 | K01925         | murD                  | <a href="http://www.genome.jp/dbget-bin/www_bget?ko:K01925">http://www.genome.jp/dbget-bin/www_bget?ko:K01925</a> | path:ko00471;path:ko00550;path:ko01100                                        |
| orf0050 | K03588         | ftsW, spoVE           | <a href="http://www.genome.jp/dbget-bin/www_bget?ko:K03588">http://www.genome.jp/dbget-bin/www_bget?ko:K03588</a> | path:ko04112                                                                  |
| orf0051 | K02563         | murG                  | <a href="http://www.genome.jp/dbget-bin/www_bget?ko:K02563">http://www.genome.jp/dbget-bin/www_bget?ko:K02563</a> | path:ko00550;path:ko01100;path:ko04112                                        |
| orf0052 | K01924         | murC                  | <a href="http://www.genome.jp/dbget-bin/www_bget?ko:K01924">http://www.genome.jp/dbget-bin/www_bget?ko:K01924</a> | path:ko00471;path:ko00550;path:ko01100                                        |
| orf0053 | K00075         | murB                  | <a href="http://www.genome.jp/dbget-bin/www_bget?ko:K00075">http://www.genome.jp/dbget-bin/www_bget?ko:K00075</a> | path:ko00520;path:ko00550;path:ko01100                                        |
| orf0054 | K01921         | ddl                   | <a href="http://www.genome.jp/dbget-bin/www_bget?ko:K01921">http://www.genome.jp/dbget-bin/www_bget?ko:K01921</a> | path:ko00473;path:ko00550;path:ko01100                                        |
| orf0055 | K03589         | ftsQ                  | <a href="http://www.genome.jp/dbget-bin/www_bget?ko:K03589">http://www.genome.jp/dbget-bin/www_bget?ko:K03589</a> | path:ko04112                                                                  |
| orf0056 | K03590         | ftsA                  | <a href="http://www.genome.jp/dbget-bin/www_bget?ko:K03590">http://www.genome.jp/dbget-bin/www_bget?ko:K03590</a> | path:ko04112                                                                  |
| orf0057 | K03531         | ftsZ                  | <a href="http://www.genome.jp/dbget-bin/www_bget?ko:K03531">http://www.genome.jp/dbget-bin/www_bget?ko:K03531</a> | path:ko04112                                                                  |
| orf0058 | K02535         | lpxC                  | <a href="http://www.genome.jp/dbget-bin/www_bget?ko:K02535">http://www.genome.jp/dbget-bin/www_bget?ko:K02535</a> | path:ko00540;path:ko01100                                                     |
| orf0059 | K05807         | bamD                  | <a href="http://www.genome.jp/dbget-bin/www_bget?ko:K05807">http://www.genome.jp/dbget-bin/www_bget?ko:K05807</a> |                                                                               |
| orf0060 | K03631         | recN                  | <a href="http://www.genome.jp/dbget-bin/www_bget?ko:K03631">http://www.genome.jp/dbget-bin/www_bget?ko:K03631</a> |                                                                               |
| orf0061 | K01972         | E6.5.1.2, ligA, ligB  | <a href="http://www.genome.jp/dbget-bin/www_bget?ko:K01972">http://www.genome.jp/dbget-bin/www_bget?ko:K01972</a> | path:ko03030;path:ko03410;path:ko03420;path:ko03430                           |
| orf0062 | K02058         | ABC.SS.S              | <a href="http://www.genome.jp/dbget-bin/www_bget?ko:K02058">http://www.genome.jp/dbget-bin/www_bget?ko:K02058</a> |                                                                               |
| orf0063 | K02056         | ABC.SS.A              | <a href="http://www.genome.jp/dbget-bin/www_bget?ko:K02056">http://www.genome.jp/dbget-bin/www_bget?ko:K02056</a> |                                                                               |
| orf0064 | K02057         | ABC.SS.P              | <a href="http://www.genome.jp/dbget-bin/www_bget?ko:K02057">http://www.genome.jp/dbget-bin/www_bget?ko:K02057</a> |                                                                               |
| orf0065 | K02057         | ABC.SS.P              | <a href="http://www.genome.jp/dbget-bin/www_bget?ko:K02057">http://www.genome.jp/dbget-bin/www_bget?ko:K02057</a> |                                                                               |
| orf0068 | K02014         | TC.FEV.OM             | <a href="http://www.genome.jp/dbget-bin/www_bget?ko:K02014">http://www.genome.jp/dbget-bin/www_bget?ko:K02014</a> |                                                                               |
| orf0069 | K02051         | ABC.SN.S              | <a href="http://www.genome.jp/dbget-bin/www_bget?ko:K02051">http://www.genome.jp/dbget-bin/www_bget?ko:K02051</a> |                                                                               |
| orf0103 | K06878         | K06878                | <a href="http://www.genome.jp/dbget-bin/www_bget?ko:K06878">http://www.genome.jp/dbget-bin/www_bget?ko:K06878</a> |                                                                               |
| orf0104 | K00769         | gpt                   | <a href="http://www.genome.jp/dbget-bin/www_bget?ko:K00769">http://www.genome.jp/dbget-bin/www_bget?ko:K00769</a> | path:ko00230;path:ko01100;path:ko01110                                        |
| orf0108 | K00135         | gabD                  | <a href="http://www.genome.jp/dbget-bin/www_bget?ko:K00135">http://www.genome.jp/dbget-bin/www_bget?ko:K00135</a> | path:ko00250;path:ko00310;path:ko00350;path:ko00650;path:ko01100;path:ko01120 |
| orf0110 | K03832         | tonB                  | <a href="http://www.genome.jp/dbget-bin/www_bget?ko:K03832">http://www.genome.jp/dbget-bin/www_bget?ko:K03832</a> |                                                                               |
| orf0112 | K02014         | TC.FEV.OM             | <a href="http://www.genome.jp/dbget-bin/www_bget?ko:K02014">http://www.genome.jp/dbget-bin/www_bget?ko:K02014</a> |                                                                               |
| orf0125 | K07334         | higA                  | <a href="http://www.genome.jp/dbget-bin/www_bget?ko:K07334">http://www.genome.jp/dbget-bin/www_bget?ko:K07334</a> |                                                                               |
| orf0130 | K09803         | K09803                | <a href="http://www.genome.jp/dbget-bin/www_bget?ko:K09803">http://www.genome.jp/dbget-bin/www_bget?ko:K09803</a> |                                                                               |
| orf0140 | K00694         | bcsA                  | <a href="http://www.genome.jp/dbget-bin/www_bget?ko:K00694">http://www.genome.jp/dbget-bin/www_bget?ko:K00694</a> | path:ko00500;path:ko01100                                                     |
| orf0143 | K11927         | rhIE                  | <a href="http://www.genome.jp/dbget-bin/www_bget?ko:K11927">http://www.genome.jp/dbget-bin/www_bget?ko:K11927</a> | path:ko03018                                                                  |
| orf0144 | K11927         | rhIE                  | <a href="http://www.genome.jp/dbget-bin/www_bget?ko:K11927">http://www.genome.jp/dbget-bin/www_bget?ko:K11927</a> | path:ko03018                                                                  |
| orf0147 | K00641         | metX                  | <a href="http://www.genome.jp/dbget-bin/www_bget?ko:K00641">http://www.genome.jp/dbget-bin/www_bget?ko:K00641</a> | path:ko00270;path:ko01100                                                     |
| orf0148 | K02337         | DPO3A1, dnaE          | <a href="http://www.genome.jp/dbget-bin/www_bget?ko:K02337">http://www.genome.jp/dbget-bin/www_bget?ko:K02337</a> | path:ko00230;path:ko00240;path:ko01100;path:ko03030;path:ko03430;path:ko03440 |
| orf0149 | K09810         | ABC.LPT.A, lolD       | <a href="http://www.genome.jp/dbget-bin/www_bget?ko:K09810">http://www.genome.jp/dbget-bin/www_bget?ko:K09810</a> | path:ko02010                                                                  |
| orf0150 | K09808         | ABC.LPT.P, lolC, lolE | <a href="http://www.genome.jp/dbget-bin/www_bget?ko:K09808">http://www.genome.jp/dbget-bin/www_bget?ko:K09808</a> | path:ko02010                                                                  |

|         |        |                      |                                                   |                                                                                            |
|---------|--------|----------------------|---------------------------------------------------|--------------------------------------------------------------------------------------------|
| orf0151 | K01881 | PARS, proS           | http://www.genome.jp/dbget-bin/www_bget?ko:K01881 | path:ko00970                                                                               |
| orf0152 | K12574 | rnj                  | http://www.genome.jp/dbget-bin/www_bget?ko:K12574 | path:ko03018                                                                               |
| orf0153 | K03524 | birA                 | http://www.genome.jp/dbget-bin/www_bget?ko:K03524 | path:ko00780;path:ko01100                                                                  |
| orf0154 | K00343 | nuoN                 | http://www.genome.jp/dbget-bin/www_bget?ko:K00343 | path:ko00190;path:ko01100                                                                  |
| orf0155 | K00341 | nuoL                 | http://www.genome.jp/dbget-bin/www_bget?ko:K00341 | path:ko00190;path:ko01100                                                                  |
| orf0156 | K00340 | nuoK                 | http://www.genome.jp/dbget-bin/www_bget?ko:K00340 | path:ko00190;path:ko01100                                                                  |
| orf0157 | K00339 | nuoJ                 | http://www.genome.jp/dbget-bin/www_bget?ko:K00339 | path:ko00190;path:ko01100                                                                  |
| orf0158 | K00338 | nuoI                 | http://www.genome.jp/dbget-bin/www_bget?ko:K00338 | path:ko00190;path:ko01100                                                                  |
| orf0159 | K00337 | nuoH                 | http://www.genome.jp/dbget-bin/www_bget?ko:K00337 | path:ko00190;path:ko01100                                                                  |
| orf0160 | K00336 | nuoG                 | http://www.genome.jp/dbget-bin/www_bget?ko:K00336 | path:ko00190;path:ko01100                                                                  |
| orf0161 | K00335 | nuoF                 | http://www.genome.jp/dbget-bin/www_bget?ko:K00335 | path:ko00190;path:ko01100                                                                  |
| orf0162 | K00334 | nuoE                 | http://www.genome.jp/dbget-bin/www_bget?ko:K00334 | path:ko00190;path:ko01100                                                                  |
| orf0163 | K00333 | nuoD                 | http://www.genome.jp/dbget-bin/www_bget?ko:K00333 | path:ko00190;path:ko01100                                                                  |
| orf0164 | K00332 | nuoC                 | http://www.genome.jp/dbget-bin/www_bget?ko:K00332 | path:ko00190;path:ko01100                                                                  |
| orf0165 | K00331 | nuoB                 | http://www.genome.jp/dbget-bin/www_bget?ko:K00331 | path:ko00190;path:ko01100                                                                  |
| orf0166 | K00330 | nuoA                 | http://www.genome.jp/dbget-bin/www_bget?ko:K00330 | path:ko00190;path:ko01100                                                                  |
| orf0167 | K03530 | hupB                 | http://www.genome.jp/dbget-bin/www_bget?ko:K03530 |                                                                                            |
| orf0168 | K01338 | lon                  | http://www.genome.jp/dbget-bin/www_bget?ko:K01338 | path:ko04112                                                                               |
| orf0170 | K03544 | clpX, CLPX           | http://www.genome.jp/dbget-bin/www_bget?ko:K03544 | path:ko04112                                                                               |
| orf0171 | K01358 | clpP, CLPP           | http://www.genome.jp/dbget-bin/www_bget?ko:K01358 | path:ko04112                                                                               |
| orf0172 | K03545 | tig                  | http://www.genome.jp/dbget-bin/www_bget?ko:K03545 |                                                                                            |
| orf0176 | K03215 | rumA                 | http://www.genome.jp/dbget-bin/www_bget?ko:K03215 |                                                                                            |
| orf0177 | K13628 | iscA, ISCA1          | http://www.genome.jp/dbget-bin/www_bget?ko:K13628 |                                                                                            |
| orf0179 | K04488 | iscU, nifU           | http://www.genome.jp/dbget-bin/www_bget?ko:K04488 |                                                                                            |
| orf0180 | K11717 | sufS                 | http://www.genome.jp/dbget-bin/www_bget?ko:K11717 | path:ko00450;path:ko01100                                                                  |
| orf0181 | K09015 | sufD                 | http://www.genome.jp/dbget-bin/www_bget?ko:K09015 |                                                                                            |
| orf0182 | K09013 | sufC                 | http://www.genome.jp/dbget-bin/www_bget?ko:K09013 |                                                                                            |
| orf0183 | K09014 | sufB                 | http://www.genome.jp/dbget-bin/www_bget?ko:K09014 |                                                                                            |
| orf0186 | K01595 | ppc                  | http://www.genome.jp/dbget-bin/www_bget?ko:K01595 | path:ko00620;path:ko00680;path:ko00710;path:ko00720;path:ko01100;path:ko01120;path:ko01200 |
| orf0188 | K02355 | fusA, GFM, EFG       | http://www.genome.jp/dbget-bin/www_bget?ko:K02355 |                                                                                            |
| orf0189 | K02902 | RP-L28, MRPL28, rpmB | http://www.genome.jp/dbget-bin/www_bget?ko:K02902 | path:ko03010                                                                               |
| orf0191 | K06147 | ABCB-BAC             | http://www.genome.jp/dbget-bin/www_bget?ko:K06147 |                                                                                            |
| orf0193 | K01354 | ptrB                 | http://www.genome.jp/dbget-bin/www_bget?ko:K01354 | path:ko05142;path:ko05143                                                                  |
| orf0196 | K04764 | ihfA, himA           | http://www.genome.jp/dbget-bin/www_bget?ko:K04764 |                                                                                            |
| orf0197 | K00648 | fabH                 | http://www.genome.jp/dbget-bin/www_bget?ko:K00648 | path:ko00061;path:ko01100;path:ko01212                                                     |
| orf0199 | K03621 | plsX                 | http://www.genome.jp/dbget-bin/www_bget?ko:K03621 | path:ko00561;path:ko00564;path:ko01100                                                     |
| orf0200 | K02911 | RP-L32, MRPL32, rpmF | http://www.genome.jp/dbget-bin/www_bget?ko:K02911 | path:ko03010                                                                               |
| orf0203 | K07638 | envZ                 | http://www.genome.jp/dbget-bin/www_bget?ko:K07638 | path:ko02020                                                                               |
| orf0204 | K02970 | RP-S21, MRPS21, rpsU | http://www.genome.jp/dbget-bin/www_bget?ko:K02970 | path:ko03010                                                                               |
| orf0205 | K01462 | PDF, def             | http://www.genome.jp/dbget-bin/www_bget?ko:K01462 |                                                                                            |
| orf0208 | K07659 | ompR                 | http://www.genome.jp/dbget-bin/www_bget?ko:K07659 | path:ko02020                                                                               |
| orf0209 | K00052 | leuB                 | http://www.genome.jp/dbget-bin/www_bget?ko:K00052 | path:ko00290;path:ko00660;path:ko01100;path:ko01110;path:ko01210;path:ko01230              |
| orf0210 | K01704 | leuD                 | http://www.genome.jp/dbget-bin/www_bget?ko:K01704 | path:ko00290;path:ko00660;path:ko01100;path:ko01110;path:ko01210;path:ko01230              |
| orf0211 | K01703 | leuC                 | http://www.genome.jp/dbget-bin/www_bget?ko:K01703 | path:ko00290;path:ko00660;path:ko01100;path:ko01110;path:ko01210;path:ko01230              |
| orf0213 | K02884 | RP-L19, MRPL19, rplS | http://www.genome.jp/dbget-bin/www_bget?ko:K02884 | path:ko03010                                                                               |
| orf0214 | K00554 | trmD                 | http://www.genome.jp/dbget-bin/www_bget?ko:K00554 |                                                                                            |
| orf0215 | K02860 | rimM                 | http://www.genome.jp/dbget-bin/www_bget?ko:K02860 |                                                                                            |
| orf0216 | K02959 | RP-S16, MRPS16, rpsP | http://www.genome.jp/dbget-bin/www_bget?ko:K02959 | path:ko03010                                                                               |
| orf0217 | K03106 | SRP54, ffh           | http://www.genome.jp/dbget-bin/www_bget?ko:K03106 | path:ko03060;path:ko03070                                                                  |
| orf0218 | K06006 | cpxP                 | http://www.genome.jp/dbget-bin/www_bget?ko:K06006 |                                                                                            |
| orf0219 | K02036 | pstB                 | http://www.genome.jp/dbget-bin/www_bget?ko:K02036 | path:ko02010                                                                               |
| orf0220 | K02038 | pstA                 | http://www.genome.jp/dbget-bin/www_bget?ko:K02038 | path:ko02010                                                                               |
| orf0221 | K02037 | pstC                 | http://www.genome.jp/dbget-bin/www_bget?ko:K02037 | path:ko02010                                                                               |
| orf0222 | K01239 | iunH                 | http://www.genome.jp/dbget-bin/www_bget?ko:K01239 | path:ko00230;path:ko00760;path:ko01100                                                     |
| orf0223 | K15599 | thiX                 | http://www.genome.jp/dbget-bin/www_bget?ko:K15599 | path:ko02010                                                                               |
| orf0224 | K15600 | thiZ                 | http://www.genome.jp/dbget-bin/www_bget?ko:K15600 | path:ko02010                                                                               |

|         |        |                              |                                                   |                                                                                                                                                                          |
|---------|--------|------------------------------|---------------------------------------------------|--------------------------------------------------------------------------------------------------------------------------------------------------------------------------|
| orf0225 | K03469 | E3.1.26.4A, RNASEH1, rnhA    | http://www.genome.jp/dbget-bin/www_bget?ko:K03469 | path:ko03030                                                                                                                                                             |
| orf0226 | K02204 | thrB2                        | http://www.genome.jp/dbget-bin/www_bget?ko:K02204 | path:ko00260;path:ko01100;path:ko01120;path:ko01230                                                                                                                      |
| orf0227 | K03527 | E1.17.1.2, lytB, ispH        | http://www.genome.jp/dbget-bin/www_bget?ko:K03527 | path:ko00900;path:ko01100;path:ko01110                                                                                                                                   |
| orf0231 | K01417 | E3.4.24.-                    | http://www.genome.jp/dbget-bin/www_bget?ko:K01417 |                                                                                                                                                                          |
| orf0233 | K06968 | rlmM                         | http://www.genome.jp/dbget-bin/www_bget?ko:K06968 |                                                                                                                                                                          |
| orf0236 | K08995 | K08995                       | http://www.genome.jp/dbget-bin/www_bget?ko:K08995 |                                                                                                                                                                          |
| orf0238 | K00851 | E2.7.1.12, gntK, idnK        | http://www.genome.jp/dbget-bin/www_bget?ko:K00851 | path:ko00030;path:ko01100;path:ko01110;path:ko01120;path:ko01200                                                                                                         |
| orf0241 | K00812 | aspB                         | http://www.genome.jp/dbget-bin/www_bget?ko:K00812 | path:ko00250;path:ko00270;path:ko00330;path:ko00350;path:ko00360;path:ko00400;path:ko00401;path:ko00950;path:ko00960;path:ko01100;path:ko01110;path:ko01210;path:ko01230 |
| orf0242 | K00812 | aspB                         | http://www.genome.jp/dbget-bin/www_bget?ko:K00812 | path:ko00250;path:ko00270;path:ko00330;path:ko00350;path:ko00360;path:ko00400;path:ko00401;path:ko00950;path:ko00960;path:ko01100;path:ko01110;path:ko01210;path:ko01230 |
| orf0243 | K01894 | gluQ                         | http://www.genome.jp/dbget-bin/www_bget?ko:K01894 |                                                                                                                                                                          |
| orf0247 | K07213 | ATOX1, ATX1, copZ            | http://www.genome.jp/dbget-bin/www_bget?ko:K07213 | path:ko04978                                                                                                                                                             |
| orf0248 | K02426 | sufE                         | http://www.genome.jp/dbget-bin/www_bget?ko:K02426 |                                                                                                                                                                          |
| orf0249 | K03667 | hslU                         | http://www.genome.jp/dbget-bin/www_bget?ko:K03667 |                                                                                                                                                                          |
| orf0250 | K01419 | hslV, clpQ                   | http://www.genome.jp/dbget-bin/www_bget?ko:K01419 |                                                                                                                                                                          |
| orf0252 | K02482 | K02482                       | http://www.genome.jp/dbget-bin/www_bget?ko:K02482 |                                                                                                                                                                          |
| orf0253 | K03412 | cheB                         | http://www.genome.jp/dbget-bin/www_bget?ko:K03412 | path:ko02020;path:ko02030                                                                                                                                                |
| orf0254 | K03407 | cheA                         | http://www.genome.jp/dbget-bin/www_bget?ko:K03407 | path:ko02020;path:ko02030                                                                                                                                                |
| orf0256 | K03408 | cheW                         | http://www.genome.jp/dbget-bin/www_bget?ko:K03408 | path:ko02020;path:ko02030                                                                                                                                                |
| orf0257 | K00575 | cheR                         | http://www.genome.jp/dbget-bin/www_bget?ko:K00575 | path:ko02020;path:ko02030                                                                                                                                                |
| orf0258 | K03408 | cheW                         | http://www.genome.jp/dbget-bin/www_bget?ko:K03408 | path:ko02020;path:ko02030                                                                                                                                                |
| orf0260 | K09812 | ftsE                         | http://www.genome.jp/dbget-bin/www_bget?ko:K09812 | path:ko02010                                                                                                                                                             |
| orf0261 | K09811 | ftsX                         | http://www.genome.jp/dbget-bin/www_bget?ko:K09811 | path:ko02010                                                                                                                                                             |
| orf0263 | K00655 | plsC                         | http://www.genome.jp/dbget-bin/www_bget?ko:K00655 | path:ko00561;path:ko00564;path:ko01100                                                                                                                                   |
| orf0264 | K10974 | codB                         | http://www.genome.jp/dbget-bin/www_bget?ko:K10974 |                                                                                                                                                                          |
| orf0265 | K09703 | K09703                       | http://www.genome.jp/dbget-bin/www_bget?ko:K09703 |                                                                                                                                                                          |
| orf0274 | K01069 | E3.1.2.6, gloB               | http://www.genome.jp/dbget-bin/www_bget?ko:K01069 | path:ko00620                                                                                                                                                             |
| orf0275 | K00599 | E2.1.1.-                     | http://www.genome.jp/dbget-bin/www_bget?ko:K00599 | path:ko01120                                                                                                                                                             |
| orf0276 | K01613 | psd, PISD                    | http://www.genome.jp/dbget-bin/www_bget?ko:K01613 | path:ko00564;path:ko01100                                                                                                                                                |
| orf0277 | K17103 | CHO1, pssA                   | http://www.genome.jp/dbget-bin/www_bget?ko:K17103 | path:ko00260;path:ko00564;path:ko01100                                                                                                                                   |
| orf0284 | K00100 | E1.1.1.-                     | http://www.genome.jp/dbget-bin/www_bget?ko:K00100 | path:ko00051;path:ko00363;path:ko00591;path:ko00625;path:ko00650;path:ko01100;path:ko01120                                                                               |
| orf0285 | K02339 | DPO3C, holC                  | http://www.genome.jp/dbget-bin/www_bget?ko:K02339 | path:ko00230;path:ko00240;path:ko01100;path:ko03030;path:ko03430;path:ko03440                                                                                            |
| orf0286 | K01255 | CARP, pepA                   | http://www.genome.jp/dbget-bin/www_bget?ko:K01255 | path:ko00480;path:ko01100                                                                                                                                                |
| orf0288 | K01082 | E3.1.3.7, cysQ, MET22, BPNT1 | http://www.genome.jp/dbget-bin/www_bget?ko:K01082 | path:ko00920;path:ko01100;path:ko01120                                                                                                                                   |
| orf0289 | K07566 | tsaC, rimN, SUA5             | http://www.genome.jp/dbget-bin/www_bget?ko:K07566 |                                                                                                                                                                          |
| orf0292 | K07091 | lptF                         | http://www.genome.jp/dbget-bin/www_bget?ko:K07091 | path:ko02010                                                                                                                                                             |
| orf0293 | K11720 | lptG                         | http://www.genome.jp/dbget-bin/www_bget?ko:K11720 | path:ko02010                                                                                                                                                             |
| orf0294 | K04744 | lptD, imp, ostA              | http://www.genome.jp/dbget-bin/www_bget?ko:K04744 |                                                                                                                                                                          |
| orf0295 | K03771 | surA                         | http://www.genome.jp/dbget-bin/www_bget?ko:K03771 |                                                                                                                                                                          |
| orf0296 | K02528 | ksgA                         | http://www.genome.jp/dbget-bin/www_bget?ko:K02528 |                                                                                                                                                                          |
| orf0297 | K00574 | E2.1.1.79, cfa               | http://www.genome.jp/dbget-bin/www_bget?ko:K00574 |                                                                                                                                                                          |
| orf0298 | K02939 | RP-L9, MRPL9, rplI           | http://www.genome.jp/dbget-bin/www_bget?ko:K02939 | path:ko03010                                                                                                                                                             |
| orf0299 | K02963 | RP-S18, MRPS18, rpsR         | http://www.genome.jp/dbget-bin/www_bget?ko:K02963 | path:ko03010                                                                                                                                                             |
| orf0300 | K02990 | RP-S6, MRPS6, rpsF           | http://www.genome.jp/dbget-bin/www_bget?ko:K02990 | path:ko03010                                                                                                                                                             |
| orf0302 | K00680 | E2.3.1.-                     | http://www.genome.jp/dbget-bin/www_bget?ko:K00680 | path:ko00350;path:ko00362;path:ko00627;path:ko00642;path:ko00903;path:ko01120                                                                                            |
| orf0303 | K03086 | SIG1, rpoD                   | http://www.genome.jp/dbget-bin/www_bget?ko:K03086 |                                                                                                                                                                          |
| orf0304 | K02316 | dnaG                         | http://www.genome.jp/dbget-bin/www_bget?ko:K02316 | path:ko03030                                                                                                                                                             |
| orf0305 | K09117 | K09117                       | http://www.genome.jp/dbget-bin/www_bget?ko:K09117 |                                                                                                                                                                          |
| orf0306 | K01956 | carA, CPA1                   | http://www.genome.jp/dbget-bin/www_bget?ko:K01956 | path:ko00240;path:ko00250;path:ko01100                                                                                                                                   |
| orf0307 | K01955 | carB, CPA2                   | http://www.genome.jp/dbget-bin/www_bget?ko:K01955 | path:ko00240;path:ko00250;path:ko01100                                                                                                                                   |
| orf0308 | K03624 | greA                         | http://www.genome.jp/dbget-bin/www_bget?ko:K03624 |                                                                                                                                                                          |
| orf0309 | K01754 | E4.3.1.19, ilvA, tdcB        | http://www.genome.jp/dbget-bin/www_bget?ko:K01754 | path:ko00260;path:ko00290;path:ko01100;path:ko01110;path:ko01200;path:ko01230                                                                                            |
| orf0310 | K00761 | upp, UPRT                    | http://www.genome.jp/dbget-bin/www_bget?ko:K00761 | path:ko00240;path:ko01100                                                                                                                                                |
| orf0311 | K07305 | msrB                         | http://www.genome.jp/dbget-bin/www_bget?ko:K07305 |                                                                                                                                                                          |
| orf0312 | K15633 | gpmI                         | http://www.genome.jp/dbget-bin/www_bget?ko:K15633 | path:ko00010;path:ko00260;path:ko00680;path:ko01100;path:ko01110;path:ko01120;path:ko01200;path:ko01230                                                                  |

|         |        |                        |                                                   |                                                     |
|---------|--------|------------------------|---------------------------------------------------|-----------------------------------------------------|
| orf0314 | K03797 | E3.4.21.102, prc, ctpA | http://www.genome.jp/dbget-bin/www_bget?ko:K03797 |                                                     |
| orf0315 | K08311 | nudH                   | http://www.genome.jp/dbget-bin/www_bget?ko:K08311 | path:ko03018                                        |
| orf0316 | K03574 | mutT, NUDT15, MTH2     | http://www.genome.jp/dbget-bin/www_bget?ko:K03574 |                                                     |
| orf0317 | K03446 | emrB                   | http://www.genome.jp/dbget-bin/www_bget?ko:K03446 |                                                     |
| orf0318 | K03543 | emrA                   | http://www.genome.jp/dbget-bin/www_bget?ko:K03543 |                                                     |
| orf0319 | K11085 | msbA                   | http://www.genome.jp/dbget-bin/www_bget?ko:K11085 | path:ko02010                                        |
| orf0320 | K00970 | pcnB                   | http://www.genome.jp/dbget-bin/www_bget?ko:K00970 | path:ko03018                                        |
| orf0321 | K09986 | K09986                 | http://www.genome.jp/dbget-bin/www_bget?ko:K09986 |                                                     |
| orf0322 | K03924 | moxR                   | http://www.genome.jp/dbget-bin/www_bget?ko:K03924 |                                                     |
| orf0327 | K07318 | K07318                 | http://www.genome.jp/dbget-bin/www_bget?ko:K07318 |                                                     |
| orf0328 | K13581 | ccrM                   | http://www.genome.jp/dbget-bin/www_bget?ko:K13581 | path:ko04112                                        |
| orf0329 | K03470 | rnhB                   | http://www.genome.jp/dbget-bin/www_bget?ko:K03470 | path:ko03030                                        |
| orf0332 | K07799 | mdtA                   | http://www.genome.jp/dbget-bin/www_bget?ko:K07799 | path:ko02020                                        |
| orf0334 | K07788 | mdtB                   | http://www.genome.jp/dbget-bin/www_bget?ko:K07788 | path:ko02020                                        |
| orf0335 | K07789 | mdtC                   | http://www.genome.jp/dbget-bin/www_bget?ko:K07789 | path:ko02020                                        |
| orf0339 | K02049 | ABC.SN.A               | http://www.genome.jp/dbget-bin/www_bget?ko:K02049 |                                                     |
| orf0340 | K02050 | ABC.SN.P               | http://www.genome.jp/dbget-bin/www_bget?ko:K02050 |                                                     |
| orf0341 | K02051 | ABC.SN.S               | http://www.genome.jp/dbget-bin/www_bget?ko:K02051 |                                                     |
| orf0343 | K02879 | RP-L17, MRPL17, rplQ   | http://www.genome.jp/dbget-bin/www_bget?ko:K02879 | path:ko03010                                        |
| orf0344 | K03040 | rpoA                   | http://www.genome.jp/dbget-bin/www_bget?ko:K03040 | path:ko00230;path:ko00240;path:ko01100;path:ko03020 |
| orf0345 | K02948 | RP-S11, MRPS11, rpsK   | http://www.genome.jp/dbget-bin/www_bget?ko:K02948 | path:ko03010                                        |
| orf0346 | K02952 | RP-S13, rpsM           | http://www.genome.jp/dbget-bin/www_bget?ko:K02952 | path:ko03010                                        |
| orf0347 | K00939 | E2.7.4.3, adk          | http://www.genome.jp/dbget-bin/www_bget?ko:K00939 | path:ko00230;path:ko01100;path:ko01110              |
| orf0348 | K03076 | secY                   | http://www.genome.jp/dbget-bin/www_bget?ko:K03076 | path:ko03060;path:ko03070                           |
| orf0349 | K02876 | RP-L15, MRPL15, rplO   | http://www.genome.jp/dbget-bin/www_bget?ko:K02876 | path:ko03010                                        |
| orf0350 | K02907 | RP-L30, MRPL30, rpmD   | http://www.genome.jp/dbget-bin/www_bget?ko:K02907 | path:ko03010                                        |
| orf0351 | K02988 | RP-S5, MRPS5, rpsE     | http://www.genome.jp/dbget-bin/www_bget?ko:K02988 | path:ko03010                                        |
| orf0352 | K02881 | RP-L18, MRPL18, rplR   | http://www.genome.jp/dbget-bin/www_bget?ko:K02881 | path:ko03010                                        |
| orf0353 | K02933 | RP-L6, MRPL6, rplF     | http://www.genome.jp/dbget-bin/www_bget?ko:K02933 | path:ko03010                                        |
| orf0354 | K02994 | RP-S8, rpsH            | http://www.genome.jp/dbget-bin/www_bget?ko:K02994 | path:ko03010                                        |
| orf0355 | K02954 | RP-S14, MRPS14, rpsN   | http://www.genome.jp/dbget-bin/www_bget?ko:K02954 | path:ko03010                                        |
| orf0356 | K02931 | RP-L5, MRPL5, rplE     | http://www.genome.jp/dbget-bin/www_bget?ko:K02931 | path:ko03010                                        |
| orf0357 | K02895 | RP-L24, MRPL24, rplX   | http://www.genome.jp/dbget-bin/www_bget?ko:K02895 | path:ko03010                                        |
| orf0358 | K02874 | RP-L14, MRPL14, rplN   | http://www.genome.jp/dbget-bin/www_bget?ko:K02874 | path:ko03010                                        |
| orf0359 | K02904 | RP-L29, rpmC           | http://www.genome.jp/dbget-bin/www_bget?ko:K02904 | path:ko03010                                        |
| orf0360 | K02878 | RP-L16, MRPL16, rplP   | http://www.genome.jp/dbget-bin/www_bget?ko:K02878 | path:ko03010                                        |
| orf0361 | K02982 | RP-S3, rpsC            | http://www.genome.jp/dbget-bin/www_bget?ko:K02982 | path:ko03010                                        |
| orf0362 | K02890 | RP-L22, MRPL22, rplV   | http://www.genome.jp/dbget-bin/www_bget?ko:K02890 | path:ko03010                                        |
| orf0363 | K02965 | RP-S19, rpsS           | http://www.genome.jp/dbget-bin/www_bget?ko:K02965 | path:ko03010                                        |
| orf0364 | K02886 | RP-L2, MRPL2, rplB     | http://www.genome.jp/dbget-bin/www_bget?ko:K02886 | path:ko03010                                        |
| orf0365 | K02892 | RP-L23, MRPL23, rplW   | http://www.genome.jp/dbget-bin/www_bget?ko:K02892 | path:ko03010                                        |
| orf0366 | K02926 | RP-L4, MRPL4, rplD     | http://www.genome.jp/dbget-bin/www_bget?ko:K02926 | path:ko03010                                        |
| orf0367 | K02906 | RP-L3, MRPL3, rplC     | http://www.genome.jp/dbget-bin/www_bget?ko:K02906 | path:ko03010                                        |
| orf0368 | K02946 | RP-S10, MRPS10, rpsJ   | http://www.genome.jp/dbget-bin/www_bget?ko:K02946 | path:ko03010                                        |
| orf0369 | K02358 | tuf, TUFM              | http://www.genome.jp/dbget-bin/www_bget?ko:K02358 | path:ko04626                                        |
| orf0370 | K02992 | RP-S7, MRPS7, rpsG     | http://www.genome.jp/dbget-bin/www_bget?ko:K02992 | path:ko03010                                        |
| orf0371 | K03046 | rpoC                   | http://www.genome.jp/dbget-bin/www_bget?ko:K03046 | path:ko00230;path:ko00240;path:ko01100;path:ko03020 |
| orf0372 | K03043 | rpoB                   | http://www.genome.jp/dbget-bin/www_bget?ko:K03043 | path:ko00230;path:ko00240;path:ko01100;path:ko03020 |
| orf0373 | K02935 | RP-L7, MRPL12, rplL    | http://www.genome.jp/dbget-bin/www_bget?ko:K02935 | path:ko03010                                        |
| orf0374 | K02864 | RP-L10, MRPL10, rplJ   | http://www.genome.jp/dbget-bin/www_bget?ko:K02864 | path:ko03010                                        |
| orf0375 | K02863 | RP-L1, MRPL1, rplA     | http://www.genome.jp/dbget-bin/www_bget?ko:K02863 | path:ko03010                                        |
| orf0376 | K02867 | RP-L11, MRPL11, rplK   | http://www.genome.jp/dbget-bin/www_bget?ko:K02867 | path:ko03010                                        |
| orf0380 | K00936 | E2.7.3.-               | http://www.genome.jp/dbget-bin/www_bget?ko:K00936 |                                                     |
| orf0381 | K02483 | K02483                 | http://www.genome.jp/dbget-bin/www_bget?ko:K02483 |                                                     |
| orf0382 | K09760 | rmuC                   | http://www.genome.jp/dbget-bin/www_bget?ko:K09760 |                                                     |
| orf0383 | K11103 | dctA                   | http://www.genome.jp/dbget-bin/www_bget?ko:K11103 | path:ko02020                                        |

|         |        |                       |                                                   |                                                                               |
|---------|--------|-----------------------|---------------------------------------------------|-------------------------------------------------------------------------------|
| orf0384 | K03761 | kgtP                  | http://www.genome.jp/dbget-bin/www_bget?ko:K03761 |                                                                               |
| orf0386 | K00982 | glnE                  | http://www.genome.jp/dbget-bin/www_bget?ko:K00982 |                                                                               |
| orf0387 | K03564 | BCP, PRXQ, DOT5       | http://www.genome.jp/dbget-bin/www_bget?ko:K03564 |                                                                               |
| orf0391 | K00684 | aat                   | http://www.genome.jp/dbget-bin/www_bget?ko:K00684 |                                                                               |
| orf0396 | K09780 | K09780                | http://www.genome.jp/dbget-bin/www_bget?ko:K09780 |                                                                               |
| orf0397 | K02195 | ccmC                  | http://www.genome.jp/dbget-bin/www_bget?ko:K02195 | path:ko02010                                                                  |
| orf0398 | K02196 | ccmD                  | http://www.genome.jp/dbget-bin/www_bget?ko:K02196 | path:ko02010                                                                  |
| orf0399 | K02197 | ccmE                  | http://www.genome.jp/dbget-bin/www_bget?ko:K02197 |                                                                               |
| orf0400 | K02198 | ccmF                  | http://www.genome.jp/dbget-bin/www_bget?ko:K02198 |                                                                               |
| orf0401 | K02199 | ccmG, dsbE            | http://www.genome.jp/dbget-bin/www_bget?ko:K02199 |                                                                               |
| orf0402 | K02200 | ccmH                  | http://www.genome.jp/dbget-bin/www_bget?ko:K02200 |                                                                               |
| orf0403 | K02200 | ccmH                  | http://www.genome.jp/dbget-bin/www_bget?ko:K02200 |                                                                               |
| orf0408 | K07263 | pqqL                  | http://www.genome.jp/dbget-bin/www_bget?ko:K07263 |                                                                               |
| orf0409 | K02945 | RP-S1, rpsA           | http://www.genome.jp/dbget-bin/www_bget?ko:K02945 | path:ko03010                                                                  |
| orf0410 | K00945 | cmk                   | http://www.genome.jp/dbget-bin/www_bget?ko:K00945 | path:ko00240;path:ko01100                                                     |
| orf0411 | K00800 | aroA                  | http://www.genome.jp/dbget-bin/www_bget?ko:K00800 | path:ko00400;path:ko01100;path:ko01110;path:ko01230                           |
| orf0413 | K01633 | folB                  | http://www.genome.jp/dbget-bin/www_bget?ko:K01633 | path:ko00790;path:ko01100                                                     |
| orf0415 | K06187 | recR                  | http://www.genome.jp/dbget-bin/www_bget?ko:K06187 | path:ko03440                                                                  |
| orf0416 | K09747 | K09747                | http://www.genome.jp/dbget-bin/www_bget?ko:K09747 |                                                                               |
| orf0417 | K02343 | DPO3G, dnaX           | http://www.genome.jp/dbget-bin/www_bget?ko:K02343 | path:ko00230;path:ko00240;path:ko01100;path:ko03030;path:ko03430;path:ko03440 |
| orf0418 | K00681 | ggt                   | http://www.genome.jp/dbget-bin/www_bget?ko:K00681 | path:ko00430;path:ko00460;path:ko00480;path:ko00590;path:ko01100              |
| orf0419 | K01265 | E3.4.11.18, map       | http://www.genome.jp/dbget-bin/www_bget?ko:K01265 |                                                                               |
| orf0421 | K01286 | E3.4.16.4             | http://www.genome.jp/dbget-bin/www_bget?ko:K01286 |                                                                               |
| orf0422 | K06891 | clpS                  | http://www.genome.jp/dbget-bin/www_bget?ko:K06891 |                                                                               |
| orf0423 | K03694 | clpA                  | http://www.genome.jp/dbget-bin/www_bget?ko:K03694 |                                                                               |
| orf0424 | K09771 | TC.SMR3               | http://www.genome.jp/dbget-bin/www_bget?ko:K09771 |                                                                               |
| orf0427 | K16066 | ydfG                  | http://www.genome.jp/dbget-bin/www_bget?ko:K16066 | path:ko00240;path:ko01100                                                     |
| orf0428 | K07735 | algH                  | http://www.genome.jp/dbget-bin/www_bget?ko:K07735 |                                                                               |
| orf0430 | K00254 | DHODH, pyrD           | http://www.genome.jp/dbget-bin/www_bget?ko:K00254 | path:ko00240;path:ko01100                                                     |
| orf0433 | K06151 | E1.1.99.3A            | http://www.genome.jp/dbget-bin/www_bget?ko:K06151 | path:ko00030;path:ko01100;path:ko01120                                        |
| orf0434 | K06152 | E1.1.99.3G            | http://www.genome.jp/dbget-bin/www_bget?ko:K06152 | path:ko00030;path:ko01100;path:ko01120                                        |
| orf0437 | K02227 | cbiB, cobD            | http://www.genome.jp/dbget-bin/www_bget?ko:K02227 | path:ko00860;path:ko01100                                                     |
| orf0438 | K02232 | E6.3.5.10, cobQ, cbiP | http://www.genome.jp/dbget-bin/www_bget?ko:K02232 | path:ko00860;path:ko01100                                                     |
| orf0439 | K00798 | E2.5.1.17, cobO, btuR | http://www.genome.jp/dbget-bin/www_bget?ko:K00798 | path:ko00860;path:ko01100                                                     |
| orf0440 | K00768 | E2.4.2.21, cobU, cobT | http://www.genome.jp/dbget-bin/www_bget?ko:K00768 | path:ko00860;path:ko01100                                                     |
| orf0441 | K02231 | cobP, cobU            | http://www.genome.jp/dbget-bin/www_bget?ko:K02231 | path:ko00860;path:ko01100                                                     |
| orf0442 | K02233 | E2.7.8.26, cobS, cobV | http://www.genome.jp/dbget-bin/www_bget?ko:K02233 | path:ko00860;path:ko01100                                                     |
| orf0446 | K11738 | ansP                  | http://www.genome.jp/dbget-bin/www_bget?ko:K11738 |                                                                               |
| orf0449 | K01424 | E3.5.1.1, ansA, ansB  | http://www.genome.jp/dbget-bin/www_bget?ko:K01424 | path:ko00250;path:ko00460;path:ko01100;path:ko01110                           |
| orf0451 | K08156 | araJ                  | http://www.genome.jp/dbget-bin/www_bget?ko:K08156 |                                                                               |
| orf0455 | K04103 | E4.1.1.74, ipdC       | http://www.genome.jp/dbget-bin/www_bget?ko:K04103 | path:ko00380;path:ko01100                                                     |
| orf0459 | K09773 | K09773                | http://www.genome.jp/dbget-bin/www_bget?ko:K09773 |                                                                               |
| orf0460 | K01006 | ppdK                  | http://www.genome.jp/dbget-bin/www_bget?ko:K01006 | path:ko00620;path:ko00710;path:ko00720;path:ko01100;path:ko01120;path:ko01200 |
| orf0462 | K03307 | TC.SSS                | http://www.genome.jp/dbget-bin/www_bget?ko:K03307 |                                                                               |
| orf0464 | K01750 | E4.3.1.12, ocd        | http://www.genome.jp/dbget-bin/www_bget?ko:K01750 | path:ko00330;path:ko01110;path:ko01230                                        |
| orf0465 | K17064 | ddh                   | http://www.genome.jp/dbget-bin/www_bget?ko:K17064 |                                                                               |
| orf0466 | K08156 | araJ                  | http://www.genome.jp/dbget-bin/www_bget?ko:K08156 |                                                                               |
| orf0470 | K13771 | nsrR                  | http://www.genome.jp/dbget-bin/www_bget?ko:K13771 | path:ko05132                                                                  |
| orf0471 | K00135 | gabD                  | http://www.genome.jp/dbget-bin/www_bget?ko:K00135 | path:ko00250;path:ko00310;path:ko00350;path:ko00650;path:ko01100;path:ko01120 |
| orf0475 | K08261 | E1.1.99.21            | http://www.genome.jp/dbget-bin/www_bget?ko:K08261 | path:ko00051                                                                  |
| orf0477 | K01126 | E3.1.4.46, glpQ, ugpQ | http://www.genome.jp/dbget-bin/www_bget?ko:K01126 | path:ko00564                                                                  |
| orf0478 | K07243 | FTR, efeU             | http://www.genome.jp/dbget-bin/www_bget?ko:K07243 |                                                                               |
| orf0480 | K05916 | hmp, YHB1             | http://www.genome.jp/dbget-bin/www_bget?ko:K05916 | path:ko05132                                                                  |
| orf0482 | K00799 | GST, gst              | http://www.genome.jp/dbget-bin/www_bget?ko:K00799 | path:ko00480;path:ko00980;path:ko00982;path:ko05204                           |
| orf0484 | K17686 | copA, ATP7            | http://www.genome.jp/dbget-bin/www_bget?ko:K17686 |                                                                               |
| orf0488 | K07233 | pcoB, copB            | http://www.genome.jp/dbget-bin/www_bget?ko:K07233 |                                                                               |

|         |        |                       |                                                   |                                                                                                                                                                                                    |
|---------|--------|-----------------------|---------------------------------------------------|----------------------------------------------------------------------------------------------------------------------------------------------------------------------------------------------------|
| orf0495 | K00694 | bcsA                  | http://www.genome.jp/dbget-bin/www_bget?ko:K00694 | path:ko00500;path:ko01100                                                                                                                                                                          |
| orf0500 | K15727 | czcB                  | http://www.genome.jp/dbget-bin/www_bget?ko:K15727 |                                                                                                                                                                                                    |
| orf0501 | K15726 | czcA                  | http://www.genome.jp/dbget-bin/www_bget?ko:K15726 |                                                                                                                                                                                                    |
| orf0503 | K02484 | K02484                | http://www.genome.jp/dbget-bin/www_bget?ko:K02484 |                                                                                                                                                                                                    |
| orf0505 | K11177 | yagR                  | http://www.genome.jp/dbget-bin/www_bget?ko:K11177 | path:ko00230;path:ko01100;path:ko01120                                                                                                                                                             |
| orf0507 | K11178 | yagS                  | http://www.genome.jp/dbget-bin/www_bget?ko:K11178 | path:ko00230;path:ko01100;path:ko01120                                                                                                                                                             |
| orf0508 | K13483 | yagT                  | http://www.genome.jp/dbget-bin/www_bget?ko:K13483 | path:ko00230;path:ko01100;path:ko01120                                                                                                                                                             |
| orf0514 | K00156 | poxB                  | http://www.genome.jp/dbget-bin/www_bget?ko:K00156 | path:ko00620                                                                                                                                                                                       |
| orf0517 | K00184 | K00184                | http://www.genome.jp/dbget-bin/www_bget?ko:K00184 |                                                                                                                                                                                                    |
| orf0518 | K00185 | K00185                | http://www.genome.jp/dbget-bin/www_bget?ko:K00185 |                                                                                                                                                                                                    |
| orf0523 | K07152 | SCO1_2                | http://www.genome.jp/dbget-bin/www_bget?ko:K07152 |                                                                                                                                                                                                    |
| orf0524 | K07152 | SCO1_2                | http://www.genome.jp/dbget-bin/www_bget?ko:K07152 |                                                                                                                                                                                                    |
| orf0525 | K02275 | coxB                  | http://www.genome.jp/dbget-bin/www_bget?ko:K02275 | path:ko00190;path:ko01100                                                                                                                                                                          |
| orf0526 | K02274 | coxA                  | http://www.genome.jp/dbget-bin/www_bget?ko:K02274 | path:ko00190;path:ko01100                                                                                                                                                                          |
| orf0527 | K02276 | coxC                  | http://www.genome.jp/dbget-bin/www_bget?ko:K02276 | path:ko00190;path:ko01100                                                                                                                                                                          |
| orf0529 | K07267 | oprB                  | http://www.genome.jp/dbget-bin/www_bget?ko:K07267 |                                                                                                                                                                                                    |
| orf0530 | K03299 | TC.GNTP               | http://www.genome.jp/dbget-bin/www_bget?ko:K03299 |                                                                                                                                                                                                    |
| orf0532 | K00046 | idnO                  | http://www.genome.jp/dbget-bin/www_bget?ko:K00046 |                                                                                                                                                                                                    |
| orf0533 | K00098 | idnD                  | http://www.genome.jp/dbget-bin/www_bget?ko:K00098 |                                                                                                                                                                                                    |
| orf0534 | K00851 | E2.7.1.12, gntK, idnK | http://www.genome.jp/dbget-bin/www_bget?ko:K00851 | path:ko00030;path:ko01100;path:ko01110;path:ko01120;path:ko01200                                                                                                                                   |
| orf0536 | K07567 | tdcF                  | http://www.genome.jp/dbget-bin/www_bget?ko:K07567 |                                                                                                                                                                                                    |
| orf0538 | K00274 | MAO, aofH             | http://www.genome.jp/dbget-bin/www_bget?ko:K00274 | path:ko00260;path:ko00330;path:ko00340;path:ko00350;path:ko00360;path:ko00380;path:ko00950;path:ko00982;path:ko01100;path:ko01110;path:ko04726;path:ko04728;path:ko05030;path:ko05031;path:ko05034 |
| orf0540 | K02014 | TC.FEV.OM             | http://www.genome.jp/dbget-bin/www_bget?ko:K02014 |                                                                                                                                                                                                    |
| orf0543 | K02014 | TC.FEV.OM             | http://www.genome.jp/dbget-bin/www_bget?ko:K02014 |                                                                                                                                                                                                    |
| orf0544 | K07267 | oprB                  | http://www.genome.jp/dbget-bin/www_bget?ko:K07267 |                                                                                                                                                                                                    |
| orf0548 | K06016 | E3.5.1.87             | http://www.genome.jp/dbget-bin/www_bget?ko:K06016 |                                                                                                                                                                                                    |
| orf0549 | K05595 | marC                  | http://www.genome.jp/dbget-bin/www_bget?ko:K05595 |                                                                                                                                                                                                    |
| orf0552 | K11927 | rhIE                  | http://www.genome.jp/dbget-bin/www_bget?ko:K11927 | path:ko03018                                                                                                                                                                                       |
| orf0555 | K09958 | K09958                | http://www.genome.jp/dbget-bin/www_bget?ko:K09958 |                                                                                                                                                                                                    |
| orf0558 | K01239 | iunH                  | http://www.genome.jp/dbget-bin/www_bget?ko:K01239 | path:ko00230;path:ko00760;path:ko01100                                                                                                                                                             |
| orf0559 | K03317 | TC.CNT                | http://www.genome.jp/dbget-bin/www_bget?ko:K03317 |                                                                                                                                                                                                    |
| orf0560 | K00428 | E1.11.1.5             | http://www.genome.jp/dbget-bin/www_bget?ko:K00428 |                                                                                                                                                                                                    |
| orf0561 | K01078 | E3.1.3.2              | http://www.genome.jp/dbget-bin/www_bget?ko:K01078 | path:ko00627;path:ko00740;path:ko01120;path:ko05152                                                                                                                                                |
| orf0562 | K01212 | sacC                  | http://www.genome.jp/dbget-bin/www_bget?ko:K01212 | path:ko00500                                                                                                                                                                                       |
| orf0575 | K00426 | cydB                  | http://www.genome.jp/dbget-bin/www_bget?ko:K00426 | path:ko00190;path:ko01100;path:ko02020                                                                                                                                                             |
| orf0577 | K03313 | nhA                   | http://www.genome.jp/dbget-bin/www_bget?ko:K03313 |                                                                                                                                                                                                    |
| orf0578 | K09474 | phoN                  | http://www.genome.jp/dbget-bin/www_bget?ko:K09474 | path:ko00627;path:ko00740;path:ko01120;path:ko02020                                                                                                                                                |
| orf0580 | K03088 | SIG3.2, rpoE          | http://www.genome.jp/dbget-bin/www_bget?ko:K03088 |                                                                                                                                                                                                    |
| orf0582 | K01113 | phoD                  | http://www.genome.jp/dbget-bin/www_bget?ko:K01113 | path:ko00627;path:ko00790;path:ko01100;path:ko01120;path:ko02020                                                                                                                                   |
| orf0588 | K07267 | oprB                  | http://www.genome.jp/dbget-bin/www_bget?ko:K07267 |                                                                                                                                                                                                    |
| orf0590 | K03366 | butA, budC            | http://www.genome.jp/dbget-bin/www_bget?ko:K03366 | path:ko00650                                                                                                                                                                                       |
| orf0595 | K01114 | plcC                  | http://www.genome.jp/dbget-bin/www_bget?ko:K01114 | path:ko00562;path:ko00564;path:ko00565;path:ko01100;path:ko04919                                                                                                                                   |
| orf0596 | K02014 | TC.FEV.OM             | http://www.genome.jp/dbget-bin/www_bget?ko:K02014 |                                                                                                                                                                                                    |
| orf0599 | K00114 | exaA                  | http://www.genome.jp/dbget-bin/www_bget?ko:K00114 | path:ko00010;path:ko00625;path:ko01100;path:ko01110;path:ko01120                                                                                                                                   |
| orf0600 | K03294 | TC.APA                | http://www.genome.jp/dbget-bin/www_bget?ko:K03294 |                                                                                                                                                                                                    |
| orf0601 | K01468 | hutI, AMDHD1          | http://www.genome.jp/dbget-bin/www_bget?ko:K01468 | path:ko00340;path:ko01100                                                                                                                                                                          |
| orf0603 | K05603 | hutF                  | http://www.genome.jp/dbget-bin/www_bget?ko:K05603 | path:ko00340                                                                                                                                                                                       |
| orf0604 | K05603 | hutF                  | http://www.genome.jp/dbget-bin/www_bget?ko:K05603 | path:ko00340                                                                                                                                                                                       |
| orf0605 | K01458 | E3.5.1.68             | http://www.genome.jp/dbget-bin/www_bget?ko:K01458 | path:ko00340;path:ko00630                                                                                                                                                                          |
| orf0606 | K00004 | BDH, butB             | http://www.genome.jp/dbget-bin/www_bget?ko:K00004 | path:ko00650                                                                                                                                                                                       |
| orf0607 | K00046 | idnO                  | http://www.genome.jp/dbget-bin/www_bget?ko:K00046 |                                                                                                                                                                                                    |
| orf0608 | K00013 | hisD                  | http://www.genome.jp/dbget-bin/www_bget?ko:K00013 | path:ko00340;path:ko01100;path:ko01110;path:ko01230                                                                                                                                                |
| orf0610 | K03457 | TC.NCS1               | http://www.genome.jp/dbget-bin/www_bget?ko:K03457 |                                                                                                                                                                                                    |
| orf0611 | K07047 | K07047                | http://www.genome.jp/dbget-bin/www_bget?ko:K07047 |                                                                                                                                                                                                    |
| orf0613 | K01438 | argE                  | http://www.genome.jp/dbget-bin/www_bget?ko:K01438 | path:ko00330;path:ko01100;path:ko01110;path:ko01210;path:ko01230                                                                                                                                   |

|         |        |                       |                                                   |                                                                                                                                                                                                                 |
|---------|--------|-----------------------|---------------------------------------------------|-----------------------------------------------------------------------------------------------------------------------------------------------------------------------------------------------------------------|
| orf0616 | K09024 | rutF                  | http://www.genome.jp/dbget-bin/www_bget?ko:K09024 | path:ko00240;path:ko01100                                                                                                                                                                                       |
| orf0617 | K00483 | hpaB                  | http://www.genome.jp/dbget-bin/www_bget?ko:K00483 | path:ko00350;path:ko01120;path:ko01220                                                                                                                                                                          |
| orf0621 | K03457 | TC.NCS1               | http://www.genome.jp/dbget-bin/www_bget?ko:K03457 |                                                                                                                                                                                                                 |
| orf0622 | K01712 | hutU, UROC1           | http://www.genome.jp/dbget-bin/www_bget?ko:K01712 | path:ko00340;path:ko01100                                                                                                                                                                                       |
| orf0623 | K01745 | hutH, HAL             | http://www.genome.jp/dbget-bin/www_bget?ko:K01745 | path:ko00340;path:ko01100                                                                                                                                                                                       |
| orf0624 | K00100 | E1.1.1.-              | http://www.genome.jp/dbget-bin/www_bget?ko:K00100 | path:ko00051;path:ko00363;path:ko00591;path:ko00625;path:ko00650;path:ko01100;path:ko01120                                                                                                                      |
| orf0625 | K05836 | hutC                  | http://www.genome.jp/dbget-bin/www_bget?ko:K05836 |                                                                                                                                                                                                                 |
| orf0626 | K09975 | K09975                | http://www.genome.jp/dbget-bin/www_bget?ko:K09975 |                                                                                                                                                                                                                 |
| orf0627 | K00102 | E1.1.2.4, dld         | http://www.genome.jp/dbget-bin/www_bget?ko:K00102 | path:ko00620                                                                                                                                                                                                    |
| orf0628 | K00817 | hisC                  | http://www.genome.jp/dbget-bin/www_bget?ko:K00817 | path:ko00340;path:ko00350;path:ko00360;path:ko00400;path:ko00401;path:ko00960;path:ko01100;path:ko01110;path:ko01230                                                                                            |
| orf0629 | K15229 | mauB                  | http://www.genome.jp/dbget-bin/www_bget?ko:K15229 | path:ko00680;path:ko01120                                                                                                                                                                                       |
| orf0630 | K15228 | mauA                  | http://www.genome.jp/dbget-bin/www_bget?ko:K15228 | path:ko00680;path:ko01120                                                                                                                                                                                       |
| orf0633 | K00316 | spdH                  | http://www.genome.jp/dbget-bin/www_bget?ko:K00316 | path:ko00330;path:ko00410                                                                                                                                                                                       |
| orf0634 | K00316 | spdH                  | http://www.genome.jp/dbget-bin/www_bget?ko:K00316 | path:ko00330;path:ko00410                                                                                                                                                                                       |
| orf0635 | K00128 | E1.2.1.3              | http://www.genome.jp/dbget-bin/www_bget?ko:K00128 | path:ko00010;path:ko00040;path:ko00053;path:ko00071;path:ko00280;path:ko00310;path:ko00330;path:ko00340;path:ko00380;path:ko00410;path:ko00561;path:ko00620;path:ko00625;path:ko00903;path:ko01100;path:ko01111 |
| orf0642 | K00822 | E2.6.1.18             | http://www.genome.jp/dbget-bin/www_bget?ko:K00822 | path:ko00280;path:ko00410;path:ko00640;path:ko01100                                                                                                                                                             |
| orf0646 | K15229 | mauB                  | http://www.genome.jp/dbget-bin/www_bget?ko:K15229 | path:ko00680;path:ko01120                                                                                                                                                                                       |
| orf0647 | K15228 | mauA                  | http://www.genome.jp/dbget-bin/www_bget?ko:K15228 | path:ko00680;path:ko01120                                                                                                                                                                                       |
| orf0649 | K03293 | TC.AAT                | http://www.genome.jp/dbget-bin/www_bget?ko:K03293 |                                                                                                                                                                                                                 |
| orf0651 | K07302 | E1.3.99.16A           | http://www.genome.jp/dbget-bin/www_bget?ko:K07302 |                                                                                                                                                                                                                 |
| orf0652 | K07303 | E1.3.99.16B           | http://www.genome.jp/dbget-bin/www_bget?ko:K07303 |                                                                                                                                                                                                                 |
| orf0656 | K15228 | mauA                  | http://www.genome.jp/dbget-bin/www_bget?ko:K15228 | path:ko00680;path:ko01120                                                                                                                                                                                       |
| orf0659 | K15229 | mauB                  | http://www.genome.jp/dbget-bin/www_bget?ko:K15229 | path:ko00680;path:ko01120                                                                                                                                                                                       |
| orf0662 | K11178 | yagS                  | http://www.genome.jp/dbget-bin/www_bget?ko:K11178 | path:ko00230;path:ko01100;path:ko01120                                                                                                                                                                          |
| orf0664 | K13098 | TLS, FUS              | http://www.genome.jp/dbget-bin/www_bget?ko:K13098 | path:ko05202                                                                                                                                                                                                    |
| orf0668 | K07002 | K07002                | http://www.genome.jp/dbget-bin/www_bget?ko:K07002 |                                                                                                                                                                                                                 |
| orf0674 | K05520 | pfpl                  | http://www.genome.jp/dbget-bin/www_bget?ko:K05520 |                                                                                                                                                                                                                 |
| orf0679 | K13688 | chvB, cgs, ndvB       | http://www.genome.jp/dbget-bin/www_bget?ko:K13688 |                                                                                                                                                                                                                 |
| orf0680 | K03316 | TC.CPA1               | http://www.genome.jp/dbget-bin/www_bget?ko:K03316 |                                                                                                                                                                                                                 |
| orf0684 | K06147 | ABCB-BAC              | http://www.genome.jp/dbget-bin/www_bget?ko:K06147 |                                                                                                                                                                                                                 |
| orf0686 | K07146 | K07146                | http://www.genome.jp/dbget-bin/www_bget?ko:K07146 |                                                                                                                                                                                                                 |
| orf0687 | K00537 | ARSC1, arsC           | http://www.genome.jp/dbget-bin/www_bget?ko:K00537 |                                                                                                                                                                                                                 |
| orf0688 | K11735 | gabP                  | http://www.genome.jp/dbget-bin/www_bget?ko:K11735 |                                                                                                                                                                                                                 |
| orf0690 | K07029 | K07029                | http://www.genome.jp/dbget-bin/www_bget?ko:K07029 |                                                                                                                                                                                                                 |
| orf0692 | K03307 | TC.SSS                | http://www.genome.jp/dbget-bin/www_bget?ko:K03307 |                                                                                                                                                                                                                 |
| orf0695 | K02433 | gatA, QRSL1           | http://www.genome.jp/dbget-bin/www_bget?ko:K02433 | path:ko00970;path:ko01100                                                                                                                                                                                       |
| orf0698 | K03517 | nadA                  | http://www.genome.jp/dbget-bin/www_bget?ko:K03517 | path:ko00760;path:ko01100                                                                                                                                                                                       |
| orf0700 | K00278 | nadB                  | http://www.genome.jp/dbget-bin/www_bget?ko:K00278 | path:ko00250;path:ko00760;path:ko01100                                                                                                                                                                          |
| orf0701 | K00767 | nadC, QPRT            | http://www.genome.jp/dbget-bin/www_bget?ko:K00767 | path:ko00760;path:ko01100                                                                                                                                                                                       |
| orf0705 | K00135 | gabD                  | http://www.genome.jp/dbget-bin/www_bget?ko:K00135 | path:ko00250;path:ko00310;path:ko00350;path:ko00650;path:ko01100;path:ko01120                                                                                                                                   |
| orf0706 | K07250 | gabT                  | http://www.genome.jp/dbget-bin/www_bget?ko:K07250 | path:ko00250;path:ko00280;path:ko00410;path:ko00640;path:ko00650;path:ko01100                                                                                                                                   |
| orf0711 | K03704 | cspA                  | http://www.genome.jp/dbget-bin/www_bget?ko:K03704 |                                                                                                                                                                                                                 |
| orf0712 | K07336 | K07336                | http://www.genome.jp/dbget-bin/www_bget?ko:K07336 |                                                                                                                                                                                                                 |
| orf0713 | K16090 | fiu                   | http://www.genome.jp/dbget-bin/www_bget?ko:K16090 |                                                                                                                                                                                                                 |
| orf0716 | K07636 | phoR                  | http://www.genome.jp/dbget-bin/www_bget?ko:K07636 | path:ko02020                                                                                                                                                                                                    |
| orf0719 | K00027 | E1.1.1.38, sfcA, maeA | http://www.genome.jp/dbget-bin/www_bget?ko:K00027 | path:ko00620;path:ko01200;path:ko02020                                                                                                                                                                          |
| orf0722 | K03543 | emrA                  | http://www.genome.jp/dbget-bin/www_bget?ko:K03543 |                                                                                                                                                                                                                 |
| orf0725 | K00285 | dadA                  | http://www.genome.jp/dbget-bin/www_bget?ko:K00285 | path:ko00360                                                                                                                                                                                                    |
| orf0726 | K01775 | alr                   | http://www.genome.jp/dbget-bin/www_bget?ko:K01775 | path:ko00473;path:ko01100                                                                                                                                                                                       |
| orf0729 | K02440 | GLPF                  | http://www.genome.jp/dbget-bin/www_bget?ko:K02440 |                                                                                                                                                                                                                 |
| orf0731 | K00111 | glpA, glpD            | http://www.genome.jp/dbget-bin/www_bget?ko:K00111 | path:ko00564                                                                                                                                                                                                    |
| orf0732 | K00864 | E2.7.1.30, glpK       | http://www.genome.jp/dbget-bin/www_bget?ko:K00864 | path:ko00561;path:ko01100;path:ko03320;path:ko04626                                                                                                                                                             |
| orf0733 | K11532 | glpX-SEBP             | http://www.genome.jp/dbget-bin/www_bget?ko:K11532 | path:ko00010;path:ko00030;path:ko00051;path:ko00680;path:ko00710;path:ko01100;path:ko01110;path:ko01120;path:ko01200                                                                                            |

|         |        |                             |                                                   |                                                                                                                                                                                                                |
|---------|--------|-----------------------------|---------------------------------------------------|----------------------------------------------------------------------------------------------------------------------------------------------------------------------------------------------------------------|
| orf0734 | K01624 | FBA, fbaA                   | http://www.genome.jp/dbget-bin/www_bget?ko:K01624 | path:ko00010;path:ko00030;path:ko00051;path:ko00680;path:ko00710;path:ko01100;path:ko01110;path:ko01120;path:ko01200;path:ko01230                                                                              |
| orf0735 | K02444 | glpR                        | http://www.genome.jp/dbget-bin/www_bget?ko:K02444 |                                                                                                                                                                                                                |
| orf0737 | K03885 | ndh                         | http://www.genome.jp/dbget-bin/www_bget?ko:K03885 | path:ko00190                                                                                                                                                                                                   |
| orf0740 | K02072 | metI                        | http://www.genome.jp/dbget-bin/www_bget?ko:K02072 | path:ko02010                                                                                                                                                                                                   |
| orf0741 | K02071 | metN                        | http://www.genome.jp/dbget-bin/www_bget?ko:K02071 | path:ko02010                                                                                                                                                                                                   |
| orf0743 | K02073 | metQ                        | http://www.genome.jp/dbget-bin/www_bget?ko:K02073 | path:ko02010                                                                                                                                                                                                   |
| orf0747 | K00128 | E1.2.1.3                    | http://www.genome.jp/dbget-bin/www_bget?ko:K00128 | path:ko00010;path:ko00040;path:ko00053;path:ko00071;path:ko00280;path:ko00310;path:ko00330;path:ko00340;path:ko00380;path:ko00410;path:ko00561;path:ko00620;path:ko00625;path:ko00903;path:ko01100;path:ko0111 |
| orf0748 | K03885 | ndh                         | http://www.genome.jp/dbget-bin/www_bget?ko:K03885 | path:ko00190                                                                                                                                                                                                   |
| orf0752 | K01992 | ABC-2.P                     | http://www.genome.jp/dbget-bin/www_bget?ko:K01992 |                                                                                                                                                                                                                |
| orf0753 | K13926 | rbbA                        | http://www.genome.jp/dbget-bin/www_bget?ko:K13926 |                                                                                                                                                                                                                |
| orf0754 | K01993 | ABC-2.TX                    | http://www.genome.jp/dbget-bin/www_bget?ko:K01993 |                                                                                                                                                                                                                |
| orf0757 | K03594 | bfr                         | http://www.genome.jp/dbget-bin/www_bget?ko:K03594 |                                                                                                                                                                                                                |
| orf0759 | K07088 | K07088                      | http://www.genome.jp/dbget-bin/www_bget?ko:K07088 |                                                                                                                                                                                                                |
| orf0762 | K03820 | Int                         | http://www.genome.jp/dbget-bin/www_bget?ko:K03820 |                                                                                                                                                                                                                |
| orf0764 | K03711 | fur                         | http://www.genome.jp/dbget-bin/www_bget?ko:K03711 |                                                                                                                                                                                                                |
| orf0767 | K03789 | rimI                        | http://www.genome.jp/dbget-bin/www_bget?ko:K03789 |                                                                                                                                                                                                                |
| orf0769 | K09019 | rutE                        | http://www.genome.jp/dbget-bin/www_bget?ko:K09019 | path:ko00240;path:ko01100                                                                                                                                                                                      |
| orf0771 | K00936 | E2.7.3.-                    | http://www.genome.jp/dbget-bin/www_bget?ko:K00936 |                                                                                                                                                                                                                |
| orf0775 | K03561 | exbB                        | http://www.genome.jp/dbget-bin/www_bget?ko:K03561 |                                                                                                                                                                                                                |
| orf0777 | K02836 | prfB                        | http://www.genome.jp/dbget-bin/www_bget?ko:K02836 |                                                                                                                                                                                                                |
| orf0778 | K05366 | mrcA                        | http://www.genome.jp/dbget-bin/www_bget?ko:K05366 | path:ko00312;path:ko00550;path:ko01100                                                                                                                                                                         |
| orf0780 | K03705 | hrcA                        | http://www.genome.jp/dbget-bin/www_bget?ko:K03705 |                                                                                                                                                                                                                |
| orf0781 | K00989 | rph                         | http://www.genome.jp/dbget-bin/www_bget?ko:K00989 |                                                                                                                                                                                                                |
| orf0782 | K02428 | rdgB                        | http://www.genome.jp/dbget-bin/www_bget?ko:K02428 | path:ko00230                                                                                                                                                                                                   |
| orf0784 | K00962 | pnp, PNPT1                  | http://www.genome.jp/dbget-bin/www_bget?ko:K00962 | path:ko00230;path:ko00240;path:ko03018                                                                                                                                                                         |
| orf0785 | K02956 | RP-S15, MRPS15, rpsO        | http://www.genome.jp/dbget-bin/www_bget?ko:K02956 | path:ko03010                                                                                                                                                                                                   |
| orf0786 | K03177 | truB, PUS4, TRUB1           | http://www.genome.jp/dbget-bin/www_bget?ko:K03177 |                                                                                                                                                                                                                |
| orf0787 | K06192 | pqiB                        | http://www.genome.jp/dbget-bin/www_bget?ko:K06192 |                                                                                                                                                                                                                |
| orf0788 | K02834 | rbfA                        | http://www.genome.jp/dbget-bin/www_bget?ko:K02834 |                                                                                                                                                                                                                |
| orf0789 | K02519 | infB, MTIF2                 | http://www.genome.jp/dbget-bin/www_bget?ko:K02519 |                                                                                                                                                                                                                |
| orf0790 | K07742 | K07742                      | http://www.genome.jp/dbget-bin/www_bget?ko:K07742 |                                                                                                                                                                                                                |
| orf0791 | K02600 | nusA                        | http://www.genome.jp/dbget-bin/www_bget?ko:K02600 |                                                                                                                                                                                                                |
| orf0792 | K09748 | rimP                        | http://www.genome.jp/dbget-bin/www_bget?ko:K09748 |                                                                                                                                                                                                                |
| orf0797 | K01681 | ACO, acnA                   | http://www.genome.jp/dbget-bin/www_bget?ko:K01681 | path:ko00020;path:ko00630;path:ko00720;path:ko01100;path:ko01110;path:ko01120;path:ko01200;path:ko01210;path:ko01230                                                                                           |
| orf0798 | K02193 | ccmA                        | http://www.genome.jp/dbget-bin/www_bget?ko:K02193 | path:ko02010                                                                                                                                                                                                   |
| orf0799 | K02194 | ccmB                        | http://www.genome.jp/dbget-bin/www_bget?ko:K02194 | path:ko02010                                                                                                                                                                                                   |
| orf0800 | K07156 | pcoC                        | http://www.genome.jp/dbget-bin/www_bget?ko:K07156 |                                                                                                                                                                                                                |
| orf0801 | K01581 | E4.1.1.17, ODC1, speC, speF | http://www.genome.jp/dbget-bin/www_bget?ko:K01581 | path:ko00330;path:ko00480;path:ko01100;path:ko01110                                                                                                                                                            |
| orf0802 | K07058 | K07058                      | http://www.genome.jp/dbget-bin/www_bget?ko:K07058 |                                                                                                                                                                                                                |
| orf0803 | K03642 | rlpA                        | http://www.genome.jp/dbget-bin/www_bget?ko:K03642 |                                                                                                                                                                                                                |
| orf0804 | K03786 | aroQ, qutE                  | http://www.genome.jp/dbget-bin/www_bget?ko:K03786 | path:ko00400;path:ko01100;path:ko01110;path:ko01230                                                                                                                                                            |
| orf0805 | K02160 | accB, bccP                  | http://www.genome.jp/dbget-bin/www_bget?ko:K02160 | path:ko00061;path:ko00253;path:ko00620;path:ko00640;path:ko00720;path:ko01100;path:ko01110;path:ko01120;path:ko01200;path:ko01212                                                                              |
| orf0806 | K01961 | accC                        | http://www.genome.jp/dbget-bin/www_bget?ko:K01961 | path:ko00061;path:ko00253;path:ko00620;path:ko00640;path:ko00720;path:ko01100;path:ko01110;path:ko01120;path:ko01200;path:ko01212                                                                              |
| orf0809 | K00759 | E2.4.2.7, apt               | http://www.genome.jp/dbget-bin/www_bget?ko:K00759 | path:ko00230;path:ko01100                                                                                                                                                                                      |
| orf0810 | K07552 | bcr                         | http://www.genome.jp/dbget-bin/www_bget?ko:K07552 |                                                                                                                                                                                                                |
| orf0812 | K02259 | COX15                       | http://www.genome.jp/dbget-bin/www_bget?ko:K02259 | path:ko00190;path:ko00860;path:ko01100;path:ko01110;path:ko02020                                                                                                                                               |
| orf0815 | K01772 | hemH, FECH                  | http://www.genome.jp/dbget-bin/www_bget?ko:K01772 | path:ko00860;path:ko01100;path:ko01110                                                                                                                                                                         |
| orf0818 | K03575 | mutY                        | http://www.genome.jp/dbget-bin/www_bget?ko:K03575 | path:ko03410                                                                                                                                                                                                   |
| orf0820 | K01817 | trpF                        | http://www.genome.jp/dbget-bin/www_bget?ko:K01817 | path:ko00400;path:ko01100;path:ko01110;path:ko01230                                                                                                                                                            |
| orf0821 | K01591 | pyrF                        | http://www.genome.jp/dbget-bin/www_bget?ko:K01591 | path:ko00240;path:ko01100                                                                                                                                                                                      |

|         |        |                       |                                                   |                                                                                                                                                                                                                     |
|---------|--------|-----------------------|---------------------------------------------------|---------------------------------------------------------------------------------------------------------------------------------------------------------------------------------------------------------------------|
| orf0826 | K00097 | pdxA                  | http://www.genome.jp/dbget-bin/www_bget?ko:K00097 | path:ko00750;path:ko01100                                                                                                                                                                                           |
| orf0827 | K03474 | pdxJ                  | http://www.genome.jp/dbget-bin/www_bget?ko:K03474 | path:ko00750;path:ko01100                                                                                                                                                                                           |
| orf0828 | K03568 | tldD                  | http://www.genome.jp/dbget-bin/www_bget?ko:K03568 |                                                                                                                                                                                                                     |
| orf0830 | K01194 | E3.2.1.28, treA, treF | http://www.genome.jp/dbget-bin/www_bget?ko:K01194 | path:ko00500;path:ko01100                                                                                                                                                                                           |
| orf0831 | K00721 | DPM1                  | http://www.genome.jp/dbget-bin/www_bget?ko:K00721 | path:ko00510;path:ko01100                                                                                                                                                                                           |
| orf0833 | K06966 | K06966                | http://www.genome.jp/dbget-bin/www_bget?ko:K06966 |                                                                                                                                                                                                                     |
| orf0837 | K00297 | metF, MTHFR           | http://www.genome.jp/dbget-bin/www_bget?ko:K00297 | path:ko00670;path:ko00720;path:ko01100;path:ko01120;path:ko01200                                                                                                                                                    |
| orf0838 | K01491 | folD                  | http://www.genome.jp/dbget-bin/www_bget?ko:K01491 | path:ko00670;path:ko00720;path:ko01100;path:ko01120;path:ko01200                                                                                                                                                    |
| orf0845 | K06177 | rluA                  | http://www.genome.jp/dbget-bin/www_bget?ko:K06177 |                                                                                                                                                                                                                     |
| orf0846 | K03466 | ftsK, spoIIIE         | http://www.genome.jp/dbget-bin/www_bget?ko:K03466 |                                                                                                                                                                                                                     |
| orf0847 | K08316 | rsmD                  | http://www.genome.jp/dbget-bin/www_bget?ko:K08316 |                                                                                                                                                                                                                     |
| orf0848 | K06178 | rluB                  | http://www.genome.jp/dbget-bin/www_bget?ko:K06178 |                                                                                                                                                                                                                     |
| orf0849 | K07010 | K07010                | http://www.genome.jp/dbget-bin/www_bget?ko:K07010 |                                                                                                                                                                                                                     |
| orf0851 | K03497 | parB, spo0J           | http://www.genome.jp/dbget-bin/www_bget?ko:K03497 |                                                                                                                                                                                                                     |
| orf0852 | K03496 | parA, soj             | http://www.genome.jp/dbget-bin/www_bget?ko:K03496 |                                                                                                                                                                                                                     |
| orf0853 | K03501 | gidB, rsmG            | http://www.genome.jp/dbget-bin/www_bget?ko:K03501 |                                                                                                                                                                                                                     |
| orf0854 | K03495 | gidA, mnmG, MTO1      | http://www.genome.jp/dbget-bin/www_bget?ko:K03495 |                                                                                                                                                                                                                     |
| orf0855 | K03650 | mnmE, trmE, MSS1      | http://www.genome.jp/dbget-bin/www_bget?ko:K03650 |                                                                                                                                                                                                                     |
| orf0856 | K00567 | E2.1.1.63, MGMT, ogt  | http://www.genome.jp/dbget-bin/www_bget?ko:K00567 |                                                                                                                                                                                                                     |
| orf0857 | K00344 | qor, CRYZ             | http://www.genome.jp/dbget-bin/www_bget?ko:K00344 |                                                                                                                                                                                                                     |
| orf0858 | K03628 | rho                   | http://www.genome.jp/dbget-bin/www_bget?ko:K03628 | path:ko03018                                                                                                                                                                                                        |
| orf0860 | K03284 | corA                  | http://www.genome.jp/dbget-bin/www_bget?ko:K03284 |                                                                                                                                                                                                                     |
| orf0862 | K01696 | trpB                  | http://www.genome.jp/dbget-bin/www_bget?ko:K01696 | path:ko00260;path:ko00400;path:ko01100;path:ko01110;path:ko01230                                                                                                                                                    |
| orf0863 | K01695 | trpA                  | http://www.genome.jp/dbget-bin/www_bget?ko:K01695 | path:ko00260;path:ko00400;path:ko01100;path:ko01110;path:ko01230                                                                                                                                                    |
| orf0864 | K01963 | accD                  | http://www.genome.jp/dbget-bin/www_bget?ko:K01963 | path:ko00061;path:ko00253;path:ko00620;path:ko00640;path:ko00720;path:ko01100;path:ko01110;path:ko01120<br>;path:ko01200;path:ko01212                                                                               |
| orf0865 | K11754 | folC                  | http://www.genome.jp/dbget-bin/www_bget?ko:K11754 | path:ko00790;path:ko01100                                                                                                                                                                                           |
| orf0866 | K08137 | galP                  | http://www.genome.jp/dbget-bin/www_bget?ko:K08137 |                                                                                                                                                                                                                     |
| orf0868 | K09823 | zur                   | http://www.genome.jp/dbget-bin/www_bget?ko:K09823 |                                                                                                                                                                                                                     |
| orf0870 | K09024 | rutF                  | http://www.genome.jp/dbget-bin/www_bget?ko:K09024 | path:ko00240;path:ko01100                                                                                                                                                                                           |
| orf0871 | K01692 | paaF, echA            | http://www.genome.jp/dbget-bin/www_bget?ko:K01692 | path:ko00071;path:ko00280;path:ko00281;path:ko00310;path:ko00360;path:ko00362;path:ko00380;path:ko00410<br>;path:ko00627;path:ko00640;path:ko00650;path:ko00903;path:ko00930;path:ko01100;path:ko01110;path:ko01112 |
| orf0877 | K03439 | trmB, METTL1          | http://www.genome.jp/dbget-bin/www_bget?ko:K03439 |                                                                                                                                                                                                                     |
| orf0878 | K03439 | trmB, METTL1          | http://www.genome.jp/dbget-bin/www_bget?ko:K03439 |                                                                                                                                                                                                                     |
| orf0880 | K00789 | metK                  | http://www.genome.jp/dbget-bin/www_bget?ko:K00789 | path:ko00270;path:ko01100;path:ko01110;path:ko01230                                                                                                                                                                 |
| orf0881 | K00215 | dapB                  | http://www.genome.jp/dbget-bin/www_bget?ko:K00215 | path:ko00300;path:ko01100;path:ko01110;path:ko01120;path:ko01230                                                                                                                                                    |
| orf0882 | K03686 | dnaJ                  | http://www.genome.jp/dbget-bin/www_bget?ko:K03686 |                                                                                                                                                                                                                     |
| orf0883 | K04043 | dnaK                  | http://www.genome.jp/dbget-bin/www_bget?ko:K04043 | path:ko03018;path:ko05152                                                                                                                                                                                           |
| orf0884 | K03687 | GRPE                  | http://www.genome.jp/dbget-bin/www_bget?ko:K03687 |                                                                                                                                                                                                                     |
| orf0885 | K14981 | chvI                  | http://www.genome.jp/dbget-bin/www_bget?ko:K14981 | path:ko02020                                                                                                                                                                                                        |
| orf0886 | K14980 | chvG                  | http://www.genome.jp/dbget-bin/www_bget?ko:K14980 | path:ko02020                                                                                                                                                                                                        |
| orf0887 | K06139 | pqqE                  | http://www.genome.jp/dbget-bin/www_bget?ko:K06139 |                                                                                                                                                                                                                     |
| orf0888 | K06138 | pqqD                  | http://www.genome.jp/dbget-bin/www_bget?ko:K06138 |                                                                                                                                                                                                                     |
| orf0889 | K06137 | pqqC                  | http://www.genome.jp/dbget-bin/www_bget?ko:K06137 |                                                                                                                                                                                                                     |
| orf0890 | K06136 | pqqB                  | http://www.genome.jp/dbget-bin/www_bget?ko:K06136 |                                                                                                                                                                                                                     |
| orf0892 | K01420 | fnr                   | http://www.genome.jp/dbget-bin/www_bget?ko:K01420 |                                                                                                                                                                                                                     |
| orf0894 | K07275 | ompW                  | http://www.genome.jp/dbget-bin/www_bget?ko:K07275 |                                                                                                                                                                                                                     |
| orf0895 | K02495 | hemN, hemZ            | http://www.genome.jp/dbget-bin/www_bget?ko:K02495 | path:ko00860;path:ko01100;path:ko01110                                                                                                                                                                              |
| orf0897 | K00311 | ETFDH                 | http://www.genome.jp/dbget-bin/www_bget?ko:K00311 |                                                                                                                                                                                                                     |
| orf0898 | K03521 | fixA, etfB            | http://www.genome.jp/dbget-bin/www_bget?ko:K03521 |                                                                                                                                                                                                                     |
| orf0899 | K03522 | fixB, etfA            | http://www.genome.jp/dbget-bin/www_bget?ko:K03522 |                                                                                                                                                                                                                     |
| orf0902 | K01790 | rfbC, rmlC            | http://www.genome.jp/dbget-bin/www_bget?ko:K01790 | path:ko00521;path:ko00523;path:ko01100;path:ko01110                                                                                                                                                                 |
| orf0903 | K06287 | maf                   | http://www.genome.jp/dbget-bin/www_bget?ko:K06287 |                                                                                                                                                                                                                     |
| orf0904 | K01599 | hemE, UROD            | http://www.genome.jp/dbget-bin/www_bget?ko:K01599 | path:ko00860;path:ko01100;path:ko01110                                                                                                                                                                              |
| orf0906 | K08973 | K08973                | http://www.genome.jp/dbget-bin/www_bget?ko:K08973 |                                                                                                                                                                                                                     |
| orf0909 | K02221 | yggT                  | http://www.genome.jp/dbget-bin/www_bget?ko:K02221 |                                                                                                                                                                                                                     |

|         |        |                             |                                                   |                                                                                                                                       |
|---------|--------|-----------------------------|---------------------------------------------------|---------------------------------------------------------------------------------------------------------------------------------------|
| orf0911 | K06023 | hprK, ptsK                  | http://www.genome.jp/dbget-bin/www_bget?ko:K06023 |                                                                                                                                       |
| orf0912 | K06958 | K06958                      | http://www.genome.jp/dbget-bin/www_bget?ko:K06958 |                                                                                                                                       |
| orf0913 | K02793 | PTS-Man-EIIA, manX          | http://www.genome.jp/dbget-bin/www_bget?ko:K02793 | path:ko00051;path:ko00520;path:ko01100;path:ko02060                                                                                   |
| orf0914 | K11189 | PTS-HPR                     | http://www.genome.jp/dbget-bin/www_bget?ko:K11189 |                                                                                                                                       |
| orf0915 | K08483 | PTS-El.PTSI, ptsI           | http://www.genome.jp/dbget-bin/www_bget?ko:K08483 | path:ko02060                                                                                                                          |
| orf0916 | K01665 | pabB                        | http://www.genome.jp/dbget-bin/www_bget?ko:K01665 | path:ko00790                                                                                                                          |
| orf0917 | K00826 | E2.6.1.42, ilvE             | http://www.genome.jp/dbget-bin/www_bget?ko:K00826 | path:ko00280;path:ko00290;path:ko00770;path:ko01100;path:ko01110;path:ko01210;path:ko01230                                            |
| orf0918 | K00602 | purH                        | http://www.genome.jp/dbget-bin/www_bget?ko:K00602 | path:ko00230;path:ko00670;path:ko01100;path:ko01110                                                                                   |
| orf0920 | K02116 | atpI                        | http://www.genome.jp/dbget-bin/www_bget?ko:K02116 |                                                                                                                                       |
| orf0921 | K02108 | ATPF0A, atpB                | http://www.genome.jp/dbget-bin/www_bget?ko:K02108 | path:ko00190;path:ko00195;path:ko01100                                                                                                |
| orf0922 | K02110 | ATPF0C, atpE                | http://www.genome.jp/dbget-bin/www_bget?ko:K02110 | path:ko00190;path:ko00195;path:ko01100                                                                                                |
| orf0923 | K02109 | ATPF0B, atpF                | http://www.genome.jp/dbget-bin/www_bget?ko:K02109 | path:ko00190;path:ko00195;path:ko01100                                                                                                |
| orf0924 | K02109 | ATPF0B, atpF                | http://www.genome.jp/dbget-bin/www_bget?ko:K02109 | path:ko00190;path:ko00195;path:ko01100                                                                                                |
| orf0925 | K00721 | DPM1                        | http://www.genome.jp/dbget-bin/www_bget?ko:K00721 | path:ko00510;path:ko01100                                                                                                             |
| orf0930 | K04485 | sms, radA                   | http://www.genome.jp/dbget-bin/www_bget?ko:K04485 |                                                                                                                                       |
| orf0932 | K02065 | ABC.X1.A                    | http://www.genome.jp/dbget-bin/www_bget?ko:K02065 | path:ko02010                                                                                                                          |
| orf0933 | K02066 | ABC.X1.P                    | http://www.genome.jp/dbget-bin/www_bget?ko:K02066 | path:ko02010                                                                                                                          |
| orf0934 | K07552 | bcr                         | http://www.genome.jp/dbget-bin/www_bget?ko:K07552 |                                                                                                                                       |
| orf0936 | K00942 | E2.7.4.8, gmk               | http://www.genome.jp/dbget-bin/www_bget?ko:K00942 | path:ko00230;path:ko01100                                                                                                             |
| orf0938 | K07789 | mdtC                        | http://www.genome.jp/dbget-bin/www_bget?ko:K07789 | path:ko02020                                                                                                                          |
| orf0940 | K00412 | CYTB, petB                  | http://www.genome.jp/dbget-bin/www_bget?ko:K00412 | path:ko00190;path:ko01100;path:ko02020;path:ko04260;path:ko04932;path:ko05010;path:ko05012;path:ko05016                               |
| orf0941 | K15598 | thiY                        | http://www.genome.jp/dbget-bin/www_bget?ko:K15598 | path:ko02010                                                                                                                          |
| orf0947 | K07003 | K07003                      | http://www.genome.jp/dbget-bin/www_bget?ko:K07003 |                                                                                                                                       |
| orf0949 | K00794 | ribH, RIB4                  | http://www.genome.jp/dbget-bin/www_bget?ko:K00794 | path:ko00740;path:ko01100                                                                                                             |
| orf0950 | K14652 | ribBA                       | http://www.genome.jp/dbget-bin/www_bget?ko:K14652 | path:ko00740;path:ko01100                                                                                                             |
| orf0951 | K00793 | ribE, RIB5                  | http://www.genome.jp/dbget-bin/www_bget?ko:K00793 | path:ko00740;path:ko01100                                                                                                             |
| orf0952 | K11752 | ribD                        | http://www.genome.jp/dbget-bin/www_bget?ko:K11752 | path:ko00740;path:ko01100                                                                                                             |
| orf0953 | K06188 | aqpZ                        | http://www.genome.jp/dbget-bin/www_bget?ko:K06188 |                                                                                                                                       |
| orf0960 | K01876 | DARS, aspS                  | http://www.genome.jp/dbget-bin/www_bget?ko:K01876 | path:ko00970                                                                                                                          |
| orf0961 | K00873 | PK, pyk                     | http://www.genome.jp/dbget-bin/www_bget?ko:K00873 | path:ko00010;path:ko00230;path:ko00620;path:ko01100;path:ko01110;path:ko01120;path:ko01200;path:ko01230<br>;path:ko04930;path:ko05203 |
| orf0962 | K00220 | tyrC                        | http://www.genome.jp/dbget-bin/www_bget?ko:K00220 | path:ko00400;path:ko00401;path:ko01100;path:ko01110;path:ko01230                                                                      |
| orf0968 | K02291 | crtB                        | http://www.genome.jp/dbget-bin/www_bget?ko:K02291 | path:ko00906;path:ko01100;path:ko01110                                                                                                |
| orf0970 | K06045 | shc                         | http://www.genome.jp/dbget-bin/www_bget?ko:K06045 | path:ko00909;path:ko01110                                                                                                             |
| orf0972 | K00925 | ackA                        | http://www.genome.jp/dbget-bin/www_bget?ko:K00925 | path:ko00430;path:ko00620;path:ko00640;path:ko00680;path:ko00720;path:ko01100;path:ko01120;path:ko01200                               |
| orf0973 | K01621 | E4.1.2.9                    | http://www.genome.jp/dbget-bin/www_bget?ko:K01621 | path:ko00030;path:ko00710;path:ko01100                                                                                                |
| orf0975 | K01710 | E4.2.1.46, rfbB, rffG       | http://www.genome.jp/dbget-bin/www_bget?ko:K01710 | path:ko00521;path:ko00523;path:ko01055;path:ko01100;path:ko01110                                                                      |
| orf0976 | K00973 | E2.7.7.24, rfbA, rffH       | http://www.genome.jp/dbget-bin/www_bget?ko:K00973 | path:ko00521;path:ko00523;path:ko01100;path:ko01110                                                                                   |
| orf0979 | K09972 | aapP, bztD                  | http://www.genome.jp/dbget-bin/www_bget?ko:K09972 | path:ko02010                                                                                                                          |
| orf0980 | K02029 | ABC.PA.P                    | http://www.genome.jp/dbget-bin/www_bget?ko:K02029 |                                                                                                                                       |
| orf0983 | K06016 | E3.5.1.87                   | http://www.genome.jp/dbget-bin/www_bget?ko:K06016 |                                                                                                                                       |
| orf0986 | K06892 | K06892                      | http://www.genome.jp/dbget-bin/www_bget?ko:K06892 |                                                                                                                                       |
| orf0992 | K06075 | slyA                        | http://www.genome.jp/dbget-bin/www_bget?ko:K06075 |                                                                                                                                       |
| orf0995 | K02052 | ABC.SP.A                    | http://www.genome.jp/dbget-bin/www_bget?ko:K02052 |                                                                                                                                       |
| orf0996 | K02055 | ABC.SP.S                    | http://www.genome.jp/dbget-bin/www_bget?ko:K02055 |                                                                                                                                       |
| orf0998 | K09160 | K09160                      | http://www.genome.jp/dbget-bin/www_bget?ko:K09160 |                                                                                                                                       |
| orf0999 | K07043 | K07043                      | http://www.genome.jp/dbget-bin/www_bget?ko:K07043 |                                                                                                                                       |
| orf1000 | K00858 | ppnK, NADK                  | http://www.genome.jp/dbget-bin/www_bget?ko:K00858 | path:ko00760;path:ko01100                                                                                                             |
| orf1001 | K01501 | E3.5.5.1                    | http://www.genome.jp/dbget-bin/www_bget?ko:K01501 | path:ko00380;path:ko00460;path:ko00627;path:ko00643;path:ko00910;path:ko01100;path:ko01120                                            |
| orf1003 | K01079 | serB, PSPH                  | http://www.genome.jp/dbget-bin/www_bget?ko:K01079 | path:ko00260;path:ko00680;path:ko01100;path:ko01120;path:ko01200;path:ko01230                                                         |
| orf1004 | K00791 | miaA, TRIT1                 | http://www.genome.jp/dbget-bin/www_bget?ko:K00791 | path:ko00908;path:ko01100;path:ko01110                                                                                                |
| orf1005 | K01652 | E2.2.1.6L, ilvB, ilvG, ilvI | http://www.genome.jp/dbget-bin/www_bget?ko:K01652 | path:ko00290;path:ko00650;path:ko00660;path:ko00770;path:ko01100;path:ko01110;path:ko01210;path:ko01230                               |
| orf1006 | K01653 | E2.2.1.6S, ilvH, ilvN       | http://www.genome.jp/dbget-bin/www_bget?ko:K01653 | path:ko00290;path:ko00650;path:ko00660;path:ko00770;path:ko01100;path:ko01110;path:ko01210;path:ko01230                               |
| orf1007 | K00053 | ilvC                        | http://www.genome.jp/dbget-bin/www_bget?ko:K00053 | path:ko00290;path:ko00770;path:ko01100;path:ko01110;path:ko01210;path:ko01230                                                         |
| orf1009 | K16165 | nagK                        | http://www.genome.jp/dbget-bin/www_bget?ko:K16165 | path:ko00350;path:ko01100;path:ko01120                                                                                                |
| orf1011 | K03695 | clpB                        | http://www.genome.jp/dbget-bin/www_bget?ko:K03695 |                                                                                                                                       |

|         |        |                                   |                                                   |                                                                                                                                                                                                                                                                                  |
|---------|--------|-----------------------------------|---------------------------------------------------|----------------------------------------------------------------------------------------------------------------------------------------------------------------------------------------------------------------------------------------------------------------------------------|
| orf1012 | K01433 | purU                              | http://www.genome.jp/dbget-bin/www_bget?ko:K01433 | path:ko00630;path:ko00670                                                                                                                                                                                                                                                        |
| orf1013 | K01491 | foiD                              | http://www.genome.jp/dbget-bin/www_bget?ko:K01491 | path:ko00670;path:ko00720;path:ko01100;path:ko01120;path:ko01200                                                                                                                                                                                                                 |
| orf1016 | K02014 | TC.FEV.OM                         | http://www.genome.jp/dbget-bin/www_bget?ko:K02014 |                                                                                                                                                                                                                                                                                  |
| orf1017 | K01745 | hutH, HAL                         | http://www.genome.jp/dbget-bin/www_bget?ko:K01745 | path:ko00340;path:ko01100                                                                                                                                                                                                                                                        |
| orf1019 | K01745 | hutH, HAL                         | http://www.genome.jp/dbget-bin/www_bget?ko:K01745 | path:ko00340;path:ko01100                                                                                                                                                                                                                                                        |
| orf1020 | K03186 | ubiX                              | http://www.genome.jp/dbget-bin/www_bget?ko:K03186 | path:ko00130;path:ko01100;path:ko01110                                                                                                                                                                                                                                           |
| orf1021 | K03182 | ubiD                              | http://www.genome.jp/dbget-bin/www_bget?ko:K03182 | path:ko00130;path:ko01100;path:ko01110                                                                                                                                                                                                                                           |
| orf1024 | K00605 | gcvT, AMT                         | http://www.genome.jp/dbget-bin/www_bget?ko:K00605 | path:ko00260;path:ko00670;path:ko01100;path:ko01200                                                                                                                                                                                                                              |
| orf1025 | K00485 | FMO                               | http://www.genome.jp/dbget-bin/www_bget?ko:K00485 | path:ko00982;path:ko01120                                                                                                                                                                                                                                                        |
| orf1026 | K00605 | gcvT, AMT                         | http://www.genome.jp/dbget-bin/www_bget?ko:K00605 | path:ko00260;path:ko00670;path:ko01100;path:ko01200                                                                                                                                                                                                                              |
| orf1030 | K01712 | hutU, UROC1                       | http://www.genome.jp/dbget-bin/www_bget?ko:K01712 | path:ko00340;path:ko01100                                                                                                                                                                                                                                                        |
| orf1031 | K09703 | K09703                            | http://www.genome.jp/dbget-bin/www_bget?ko:K09703 |                                                                                                                                                                                                                                                                                  |
| orf1032 | K06016 | E3.5.1.87                         | http://www.genome.jp/dbget-bin/www_bget?ko:K06016 |                                                                                                                                                                                                                                                                                  |
| orf1034 | K01466 | allB                              | http://www.genome.jp/dbget-bin/www_bget?ko:K01466 | path:ko00230;path:ko01100;path:ko01120                                                                                                                                                                                                                                           |
| orf1035 | K01745 | hutH, HAL                         | http://www.genome.jp/dbget-bin/www_bget?ko:K01745 | path:ko00340;path:ko01100                                                                                                                                                                                                                                                        |
| orf1036 | K03762 | proP                              | http://www.genome.jp/dbget-bin/www_bget?ko:K03762 |                                                                                                                                                                                                                                                                                  |
| orf1037 | K02014 | TC.FEV.OM                         | http://www.genome.jp/dbget-bin/www_bget?ko:K02014 |                                                                                                                                                                                                                                                                                  |
| orf1042 | K01433 | purU                              | http://www.genome.jp/dbget-bin/www_bget?ko:K01433 | path:ko00630;path:ko00670                                                                                                                                                                                                                                                        |
| orf1043 | K00305 | soxG                              | http://www.genome.jp/dbget-bin/www_bget?ko:K00305 | path:ko00260;path:ko01100                                                                                                                                                                                                                                                        |
| orf1044 | K00302 | soxA                              | http://www.genome.jp/dbget-bin/www_bget?ko:K00302 | path:ko00260;path:ko01100                                                                                                                                                                                                                                                        |
| orf1045 | K00304 | soxD                              | http://www.genome.jp/dbget-bin/www_bget?ko:K00304 | path:ko00260;path:ko01100                                                                                                                                                                                                                                                        |
| orf1046 | K00303 | soxB                              | http://www.genome.jp/dbget-bin/www_bget?ko:K00303 | path:ko00260;path:ko01100                                                                                                                                                                                                                                                        |
| orf1052 | K01915 | glnA                              | http://www.genome.jp/dbget-bin/www_bget?ko:K01915 | path:ko00250;path:ko00330;path:ko00630;path:ko00910;path:ko01100;path:ko01120;path:ko01230;path:ko02020;path:ko04724;path:ko04727                                                                                                                                                |
| orf1055 | K03320 | amt, AMT, MEP                     | http://www.genome.jp/dbget-bin/www_bget?ko:K03320 |                                                                                                                                                                                                                                                                                  |
| orf1059 | K03088 | SIG3.2, rpoE                      | http://www.genome.jp/dbget-bin/www_bget?ko:K03088 |                                                                                                                                                                                                                                                                                  |
| orf1061 | K02014 | TC.FEV.OM                         | http://www.genome.jp/dbget-bin/www_bget?ko:K02014 |                                                                                                                                                                                                                                                                                  |
| orf1062 | K07789 | mdtC                              | http://www.genome.jp/dbget-bin/www_bget?ko:K07789 | path:ko02020                                                                                                                                                                                                                                                                     |
| orf1072 | K04763 | xerD                              | http://www.genome.jp/dbget-bin/www_bget?ko:K04763 |                                                                                                                                                                                                                                                                                  |
| orf1073 | K02434 | gatB, PET112                      | http://www.genome.jp/dbget-bin/www_bget?ko:K02434 | path:ko00970;path:ko01100                                                                                                                                                                                                                                                        |
| orf1074 | K02433 | gatA, QRSL1                       | http://www.genome.jp/dbget-bin/www_bget?ko:K02433 | path:ko00970;path:ko01100                                                                                                                                                                                                                                                        |
| orf1075 | K07447 | ruvX                              | http://www.genome.jp/dbget-bin/www_bget?ko:K07447 |                                                                                                                                                                                                                                                                                  |
| orf1076 | K02435 | gatC, GATC                        | http://www.genome.jp/dbget-bin/www_bget?ko:K02435 | path:ko00970;path:ko01100                                                                                                                                                                                                                                                        |
| orf1077 | K06188 | aqpZ                              | http://www.genome.jp/dbget-bin/www_bget?ko:K06188 |                                                                                                                                                                                                                                                                                  |
| orf1078 | K00863 | E2.7.1.29, DAK1, DAK2             | http://www.genome.jp/dbget-bin/www_bget?ko:K00863 | path:ko00561;path:ko00680;path:ko01100;path:ko01120;path:ko01200;path:ko04622                                                                                                                                                                                                    |
| orf1079 | K06193 | phnA                              | http://www.genome.jp/dbget-bin/www_bget?ko:K06193 | path:ko00440;path:ko01120                                                                                                                                                                                                                                                        |
| orf1084 | K09768 | K09768                            | http://www.genome.jp/dbget-bin/www_bget?ko:K09768 |                                                                                                                                                                                                                                                                                  |
| orf1086 | K01835 | pgm                               | http://www.genome.jp/dbget-bin/www_bget?ko:K01835 | path:ko00010;path:ko00030;path:ko00052;path:ko00230;path:ko00500;path:ko00520;path:ko00521;path:ko01100;path:ko01110;path:ko01120                                                                                                                                                |
| orf1088 | K03711 | fur                               | http://www.genome.jp/dbget-bin/www_bget?ko:K03711 |                                                                                                                                                                                                                                                                                  |
| orf1091 | K03594 | bfr                               | http://www.genome.jp/dbget-bin/www_bget?ko:K03594 |                                                                                                                                                                                                                                                                                  |
| orf1092 | K00899 | mtnK                              | http://www.genome.jp/dbget-bin/www_bget?ko:K00899 | path:ko00270;path:ko01100                                                                                                                                                                                                                                                        |
| orf1093 | K03427 | hsdM                              | http://www.genome.jp/dbget-bin/www_bget?ko:K03427 |                                                                                                                                                                                                                                                                                  |
| orf1096 | K01154 | hsdS                              | http://www.genome.jp/dbget-bin/www_bget?ko:K01154 |                                                                                                                                                                                                                                                                                  |
| orf1098 | K03327 | TC.MATE, SLC47A, norM, mdtK, dinF | http://www.genome.jp/dbget-bin/www_bget?ko:K03327 |                                                                                                                                                                                                                                                                                  |
| orf1101 | K00058 | serA, PHGDH                       | http://www.genome.jp/dbget-bin/www_bget?ko:K00058 | path:ko00260;path:ko00680;path:ko01100;path:ko01120;path:ko01200;path:ko01230                                                                                                                                                                                                    |
| orf1102 | K01092 | E3.1.3.25, IMPA, suhB             | http://www.genome.jp/dbget-bin/www_bget?ko:K01092 | path:ko00521;path:ko00562;path:ko01100;path:ko01110;path:ko04070                                                                                                                                                                                                                 |
| orf1103 | K08738 | CYC                               | http://www.genome.jp/dbget-bin/www_bget?ko:K08738 | path:ko00920;path:ko01100;path:ko01120;path:ko02020;path:ko04115;path:ko04210;path:ko04932;path:ko05010;path:ko05012;path:ko05014;path:ko05016;path:ko05134;path:ko05145;path:ko05152;path:ko05161;path:ko05164;path:ko05168;path:ko05200;path:ko05210;path:ko05222;path:ko05416 |
| orf1104 | K00979 | kdsB                              | http://www.genome.jp/dbget-bin/www_bget?ko:K00979 | path:ko00540;path:ko01100                                                                                                                                                                                                                                                        |
| orf1105 | K04518 | pheA2                             | http://www.genome.jp/dbget-bin/www_bget?ko:K04518 | path:ko00400;path:ko01100;path:ko01110;path:ko01230                                                                                                                                                                                                                              |
| orf1106 | K01714 | dapA                              | http://www.genome.jp/dbget-bin/www_bget?ko:K01714 | path:ko00300;path:ko01100;path:ko01110;path:ko01120;path:ko01230                                                                                                                                                                                                                 |
| orf1107 | K03664 | smpB                              | http://www.genome.jp/dbget-bin/www_bget?ko:K03664 |                                                                                                                                                                                                                                                                                  |

|         |        |                       |                                                   |                                                                                                                                   |
|---------|--------|-----------------------|---------------------------------------------------|-----------------------------------------------------------------------------------------------------------------------------------|
| orf1108 | K03704 | cspA                  | http://www.genome.jp/dbget-bin/www_bget?ko:K03704 |                                                                                                                                   |
| orf1109 | K03655 | recG                  | http://www.genome.jp/dbget-bin/www_bget?ko:K03655 | path:ko03440                                                                                                                      |
| orf1110 | K09159 | K09159                | http://www.genome.jp/dbget-bin/www_bget?ko:K09159 |                                                                                                                                   |
| orf1111 | K03723 | mfd                   | http://www.genome.jp/dbget-bin/www_bget?ko:K03723 | path:ko03420                                                                                                                      |
| orf1113 | K14347 | SLC10A7, P7           | http://www.genome.jp/dbget-bin/www_bget?ko:K14347 |                                                                                                                                   |
| orf1115 | K09883 | cobT                  | http://www.genome.jp/dbget-bin/www_bget?ko:K09883 | path:ko00860;path:ko01100                                                                                                         |
| orf1116 | K09882 | cobS                  | http://www.genome.jp/dbget-bin/www_bget?ko:K09882 | path:ko00860;path:ko01100                                                                                                         |
| orf1118 | K05527 | bolA                  | http://www.genome.jp/dbget-bin/www_bget?ko:K05527 |                                                                                                                                   |
| orf1120 | K03801 | lipB                  | http://www.genome.jp/dbget-bin/www_bget?ko:K03801 | path:ko00785;path:ko01100                                                                                                         |
| orf1122 | K00963 | UGP2, galU, galF      | http://www.genome.jp/dbget-bin/www_bget?ko:K00963 | path:ko00040;path:ko00052;path:ko00500;path:ko00520;path:ko01100;path:ko01110                                                     |
| orf1123 | K01840 | manB                  | http://www.genome.jp/dbget-bin/www_bget?ko:K01840 | path:ko00051;path:ko00520;path:ko01100;path:ko01110                                                                               |
| orf1125 | K03639 | MOCS1, moaA           | http://www.genome.jp/dbget-bin/www_bget?ko:K03639 | path:ko00790;path:ko01100;path:ko04122                                                                                            |
| orf1128 | K03676 | grxC, GLRX, GLRX2     | http://www.genome.jp/dbget-bin/www_bget?ko:K03676 |                                                                                                                                   |
| orf1134 | K00568 | ubiG                  | http://www.genome.jp/dbget-bin/www_bget?ko:K00568 | path:ko00130;path:ko01100;path:ko01110                                                                                            |
| orf1135 | K00928 | lysC                  | http://www.genome.jp/dbget-bin/www_bget?ko:K00928 | path:ko00260;path:ko00270;path:ko00300;path:ko01100;path:ko01110;path:ko01120;path:ko01210;path:ko01230                           |
| orf1136 | K02371 | fabK                  | http://www.genome.jp/dbget-bin/www_bget?ko:K02371 | path:ko00061;path:ko01100;path:ko01212                                                                                            |
| orf1137 | K15539 | rodZ                  | http://www.genome.jp/dbget-bin/www_bget?ko:K15539 |                                                                                                                                   |
| orf1138 | K03526 | E1.17.7.1, gcpE, ispG | http://www.genome.jp/dbget-bin/www_bget?ko:K03526 | path:ko00900;path:ko01100;path:ko01110                                                                                            |
| orf1139 | K01892 | HARS, hisS            | http://www.genome.jp/dbget-bin/www_bget?ko:K01892 | path:ko00970                                                                                                                      |
| orf1140 | K02835 | prfA, MTRF1, MRF1     | http://www.genome.jp/dbget-bin/www_bget?ko:K02835 |                                                                                                                                   |
| orf1142 | K02493 | hemK, prmC            | http://www.genome.jp/dbget-bin/www_bget?ko:K02493 |                                                                                                                                   |
| orf1145 | K00833 | bioA                  | http://www.genome.jp/dbget-bin/www_bget?ko:K00833 | path:ko00780;path:ko01100                                                                                                         |
| orf1146 | K00652 | bioF                  | http://www.genome.jp/dbget-bin/www_bget?ko:K00652 | path:ko00780;path:ko01100                                                                                                         |
| orf1147 | K02170 | bioH                  | http://www.genome.jp/dbget-bin/www_bget?ko:K02170 | path:ko00780;path:ko01100                                                                                                         |
| orf1148 | K02169 | bioC                  | http://www.genome.jp/dbget-bin/www_bget?ko:K02169 | path:ko00780;path:ko01100                                                                                                         |
| orf1149 | K01356 | lexA                  | http://www.genome.jp/dbget-bin/www_bget?ko:K01356 |                                                                                                                                   |
| orf1150 | K03750 | moeA                  | http://www.genome.jp/dbget-bin/www_bget?ko:K03750 |                                                                                                                                   |
| orf1151 | K02913 | RP-L33, MRPL33, rpmG  | http://www.genome.jp/dbget-bin/www_bget?ko:K02913 | path:ko03010                                                                                                                      |
| orf1153 | K01689 | ENO, eno              | http://www.genome.jp/dbget-bin/www_bget?ko:K01689 | path:ko00010;path:ko00680;path:ko01100;path:ko01110;path:ko01120;path:ko01200;path:ko01230;path:ko03018;path:ko04066              |
| orf1156 | K07302 | E1.3.99.16A           | http://www.genome.jp/dbget-bin/www_bget?ko:K07302 |                                                                                                                                   |
| orf1159 | K00117 | gcd                   | http://www.genome.jp/dbget-bin/www_bget?ko:K00117 | path:ko00030;path:ko01100;path:ko01110                                                                                            |
| orf1160 | K00045 | E1.1.1.67, mtlK       | http://www.genome.jp/dbget-bin/www_bget?ko:K00045 | path:ko00051                                                                                                                      |
| orf1162 | K02314 | dnaB                  | http://www.genome.jp/dbget-bin/www_bget?ko:K02314 | path:ko03030;path:ko04112                                                                                                         |
| orf1163 | K07391 | comM                  | http://www.genome.jp/dbget-bin/www_bget?ko:K07391 |                                                                                                                                   |
| orf1166 | K07276 | K07276                | http://www.genome.jp/dbget-bin/www_bget?ko:K07276 |                                                                                                                                   |
| orf1167 | K11927 | rhIE                  | http://www.genome.jp/dbget-bin/www_bget?ko:K11927 | path:ko03018                                                                                                                      |
| orf1169 | K00600 | glyA, SHMT            | http://www.genome.jp/dbget-bin/www_bget?ko:K00600 | path:ko00260;path:ko00460;path:ko00630;path:ko00670;path:ko00680;path:ko01100;path:ko01110;path:ko01120;path:ko01200;path:ko01230 |
| orf1170 | K03294 | TC.APA                | http://www.genome.jp/dbget-bin/www_bget?ko:K03294 |                                                                                                                                   |
| orf1171 | K01698 | hemB, ALAD            | http://www.genome.jp/dbget-bin/www_bget?ko:K01698 | path:ko00860;path:ko01100;path:ko01110                                                                                            |
| orf1172 | K00685 | ATE1, ate1            | http://www.genome.jp/dbget-bin/www_bget?ko:K00685 |                                                                                                                                   |
| orf1173 | K02621 | parC                  | http://www.genome.jp/dbget-bin/www_bget?ko:K02621 |                                                                                                                                   |
| orf1174 | K03584 | recO                  | http://www.genome.jp/dbget-bin/www_bget?ko:K03584 | path:ko03440                                                                                                                      |
| orf1175 | K02357 | tsf, TSFM             | http://www.genome.jp/dbget-bin/www_bget?ko:K02357 |                                                                                                                                   |
| orf1176 | K02967 | RP-S2, MRPS2, rpsB    | http://www.genome.jp/dbget-bin/www_bget?ko:K02967 | path:ko03010                                                                                                                      |
| orf1177 | K04063 | osmC                  | http://www.genome.jp/dbget-bin/www_bget?ko:K04063 |                                                                                                                                   |
| orf1178 | K01736 | aroC                  | http://www.genome.jp/dbget-bin/www_bget?ko:K01736 | path:ko00400;path:ko01100;path:ko01110;path:ko01230                                                                               |
| orf1179 | K00208 | fabI                  | http://www.genome.jp/dbget-bin/www_bget?ko:K00208 | path:ko00061;path:ko00780;path:ko01100;path:ko01212                                                                               |
| orf1180 | K00275 | pdxH, PNPO            | http://www.genome.jp/dbget-bin/www_bget?ko:K00275 | path:ko00750;path:ko01100                                                                                                         |
| orf1182 | K00390 | cysH                  | http://www.genome.jp/dbget-bin/www_bget?ko:K00390 | path:ko00920;path:ko01100;path:ko01120                                                                                            |
| orf1183 | K00957 | cysD                  | http://www.genome.jp/dbget-bin/www_bget?ko:K00957 | path:ko00230;path:ko00450;path:ko00920;path:ko01100;path:ko01120                                                                  |
| orf1184 | K00955 | cysNC                 | http://www.genome.jp/dbget-bin/www_bget?ko:K00955 | path:ko00230;path:ko00450;path:ko00920;path:ko01100;path:ko01120                                                                  |
| orf1186 | K00381 | cysI                  | http://www.genome.jp/dbget-bin/www_bget?ko:K00381 | path:ko00920;path:ko01100;path:ko01120                                                                                            |
| orf1188 | K02527 | kdtA, waaA            | http://www.genome.jp/dbget-bin/www_bget?ko:K02527 | path:ko00540;path:ko01100                                                                                                         |
| orf1189 | K00912 | lpxK                  | http://www.genome.jp/dbget-bin/www_bget?ko:K00912 | path:ko00540;path:ko01100                                                                                                         |

|         |        |                      |                                                   |                                                                                                                                   |
|---------|--------|----------------------|---------------------------------------------------|-----------------------------------------------------------------------------------------------------------------------------------|
| orf1190 | K02517 | htrB                 | http://www.genome.jp/dbget-bin/www_bget?ko:K02517 | path:ko00540;path:ko01100                                                                                                         |
| orf1194 | K07056 | rsmI                 | http://www.genome.jp/dbget-bin/www_bget?ko:K07056 |                                                                                                                                   |
| orf1197 | K01919 | gshA                 | http://www.genome.jp/dbget-bin/www_bget?ko:K01919 | path:ko00480;path:ko01100                                                                                                         |
| orf1198 | K09761 | rsmE                 | http://www.genome.jp/dbget-bin/www_bget?ko:K09761 |                                                                                                                                   |
| orf1199 | K03179 | ubiA                 | http://www.genome.jp/dbget-bin/www_bget?ko:K03179 | path:ko00130;path:ko01100;path:ko01110                                                                                            |
| orf1200 | K01061 | E3.1.1.45            | http://www.genome.jp/dbget-bin/www_bget?ko:K01061 | path:ko00361;path:ko00364;path:ko00623;path:ko01100;path:ko01110;path:ko01120                                                     |
| orf1202 | K03299 | TC.GNTP              | http://www.genome.jp/dbget-bin/www_bget?ko:K03299 |                                                                                                                                   |
| orf1203 | K08281 | pncA                 | http://www.genome.jp/dbget-bin/www_bget?ko:K08281 | path:ko00760;path:ko01100                                                                                                         |
| orf1204 | K03977 | engA                 | http://www.genome.jp/dbget-bin/www_bget?ko:K03977 |                                                                                                                                   |
| orf1208 | K06980 | K06980               | http://www.genome.jp/dbget-bin/www_bget?ko:K06980 |                                                                                                                                   |
| orf1209 | K01496 | hisI                 | http://www.genome.jp/dbget-bin/www_bget?ko:K01496 | path:ko00340;path:ko01100;path:ko01110;path:ko01230                                                                               |
| orf1211 | K00748 | lpxB                 | http://www.genome.jp/dbget-bin/www_bget?ko:K00748 | path:ko00540;path:ko01100                                                                                                         |
| orf1212 | K02040 | pstS                 | http://www.genome.jp/dbget-bin/www_bget?ko:K02040 | path:ko02010;path:ko02020;path:ko05152                                                                                            |
| orf1213 | K01890 | FARSB, pheT          | http://www.genome.jp/dbget-bin/www_bget?ko:K01890 | path:ko00970                                                                                                                      |
| orf1214 | K01889 | FARSA, pheS          | http://www.genome.jp/dbget-bin/www_bget?ko:K01889 | path:ko00970                                                                                                                      |
| orf1215 | K02887 | RP-L20, MRPL20, rplT | http://www.genome.jp/dbget-bin/www_bget?ko:K02887 | path:ko03010                                                                                                                      |
| orf1216 | K02916 | RP-L35, MRPL35, rpmI | http://www.genome.jp/dbget-bin/www_bget?ko:K02916 | path:ko03010                                                                                                                      |
| orf1217 | K00100 | E1.1.1.-             | http://www.genome.jp/dbget-bin/www_bget?ko:K00100 | path:ko00051;path:ko00363;path:ko00591;path:ko00625;path:ko00650;path:ko01100;path:ko01120                                        |
| orf1218 | K01338 | lon                  | http://www.genome.jp/dbget-bin/www_bget?ko:K01338 | path:ko04112                                                                                                                      |
| orf1222 | K01524 | ppx-gppA             | http://www.genome.jp/dbget-bin/www_bget?ko:K01524 | path:ko00230                                                                                                                      |
| orf1223 | K02427 | rlmE, rrmJ, ftsJ     | http://www.genome.jp/dbget-bin/www_bget?ko:K02427 |                                                                                                                                   |
| orf1224 | K00847 | E2.7.1.4, scrK       | http://www.genome.jp/dbget-bin/www_bget?ko:K00847 | path:ko00051;path:ko00500;path:ko00520;path:ko01100                                                                               |
| orf1225 | K04085 | tusA, sirA           | http://www.genome.jp/dbget-bin/www_bget?ko:K04085 | path:ko04122                                                                                                                      |
| orf1226 | K03602 | xseB                 | http://www.genome.jp/dbget-bin/www_bget?ko:K03602 | path:ko03430                                                                                                                      |
| orf1227 | K00795 | ispA                 | http://www.genome.jp/dbget-bin/www_bget?ko:K00795 | path:ko00900;path:ko01100;path:ko01110                                                                                            |
| orf1230 | K00878 | thiM                 | http://www.genome.jp/dbget-bin/www_bget?ko:K00878 | path:ko00730;path:ko01100                                                                                                         |
| orf1232 | K01576 | mdlC                 | http://www.genome.jp/dbget-bin/www_bget?ko:K01576 | path:ko00627;path:ko01120                                                                                                         |
| orf1235 | K00845 | glk                  | http://www.genome.jp/dbget-bin/www_bget?ko:K00845 | path:ko00010;path:ko00052;path:ko00500;path:ko00520;path:ko00521;path:ko00524;path:ko01100;path:ko01110;path:ko01120;path:ko01200 |
| orf1238 | K00946 | thiL                 | http://www.genome.jp/dbget-bin/www_bget?ko:K00946 | path:ko00730;path:ko01100                                                                                                         |
| orf1239 | K03625 | nusB                 | http://www.genome.jp/dbget-bin/www_bget?ko:K03625 |                                                                                                                                   |
| orf1240 | K07738 | nrdR                 | http://www.genome.jp/dbget-bin/www_bget?ko:K07738 |                                                                                                                                   |
| orf1241 | K03654 | recQ                 | http://www.genome.jp/dbget-bin/www_bget?ko:K03654 | path:ko03018                                                                                                                      |
| orf1243 | K16012 | cydC                 | http://www.genome.jp/dbget-bin/www_bget?ko:K16012 | path:ko02010                                                                                                                      |
| orf1244 | K16013 | cydD                 | http://www.genome.jp/dbget-bin/www_bget?ko:K16013 | path:ko02010                                                                                                                      |
| orf1246 | K03088 | SIG3.2, rpoE         | http://www.genome.jp/dbget-bin/www_bget?ko:K03088 |                                                                                                                                   |
| orf1247 | K03088 | SIG3.2, rpoE         | http://www.genome.jp/dbget-bin/www_bget?ko:K03088 |                                                                                                                                   |
| orf1249 | K00697 | otsA                 | http://www.genome.jp/dbget-bin/www_bget?ko:K00697 | path:ko00500;path:ko01100                                                                                                         |
| orf1250 | K15738 | uup                  | http://www.genome.jp/dbget-bin/www_bget?ko:K15738 |                                                                                                                                   |
| orf1253 | K03072 | secD                 | http://www.genome.jp/dbget-bin/www_bget?ko:K03072 | path:ko03060;path:ko03070                                                                                                         |
| orf1254 | K03074 | secF                 | http://www.genome.jp/dbget-bin/www_bget?ko:K03074 | path:ko03060;path:ko03070                                                                                                         |
| orf1256 | K03282 | mscL                 | http://www.genome.jp/dbget-bin/www_bget?ko:K03282 |                                                                                                                                   |
| orf1257 | K02909 | RP-L31, rpmE         | http://www.genome.jp/dbget-bin/www_bget?ko:K02909 | path:ko03010                                                                                                                      |
| orf1258 | K04080 | ibpA                 | http://www.genome.jp/dbget-bin/www_bget?ko:K04080 |                                                                                                                                   |
| orf1259 | K09987 | K09987               | http://www.genome.jp/dbget-bin/www_bget?ko:K09987 |                                                                                                                                   |
| orf1262 | K01588 | purE                 | http://www.genome.jp/dbget-bin/www_bget?ko:K01588 | path:ko00230;path:ko01100;path:ko01110                                                                                            |
| orf1263 | K01589 | purK                 | http://www.genome.jp/dbget-bin/www_bget?ko:K01589 | path:ko00230;path:ko01100;path:ko01110                                                                                            |
| orf1264 | K03630 | radC                 | http://www.genome.jp/dbget-bin/www_bget?ko:K03630 |                                                                                                                                   |
| orf1265 | K01091 | E3.1.3.18, gph       | http://www.genome.jp/dbget-bin/www_bget?ko:K01091 | path:ko00630;path:ko01100;path:ko01110                                                                                            |
| orf1266 | K03630 | radC                 | http://www.genome.jp/dbget-bin/www_bget?ko:K03630 |                                                                                                                                   |
| orf1267 | K03657 | uvrD, pcrA           | http://www.genome.jp/dbget-bin/www_bget?ko:K03657 | path:ko03420;path:ko03430                                                                                                         |
| orf1268 | K02687 | prmA                 | http://www.genome.jp/dbget-bin/www_bget?ko:K02687 |                                                                                                                                   |
| orf1269 | K03823 | pat                  | http://www.genome.jp/dbget-bin/www_bget?ko:K03823 | path:ko00440;path:ko01110                                                                                                         |
| orf1270 | K01262 | pepP                 | http://www.genome.jp/dbget-bin/www_bget?ko:K01262 |                                                                                                                                   |
| orf1271 | K00030 | IDH3                 | http://www.genome.jp/dbget-bin/www_bget?ko:K00030 | path:ko00020;path:ko01100;path:ko01110;path:ko01120;path:ko01200;path:ko01210;path:ko01230                                        |
| orf1273 | K07127 | uraH, pucM, hiuH     | http://www.genome.jp/dbget-bin/www_bget?ko:K07127 | path:ko00230;path:ko01100;path:ko01120                                                                                            |

|         |        |                          |                                                   |                                                                                                         |
|---------|--------|--------------------------|---------------------------------------------------|---------------------------------------------------------------------------------------------------------|
| orf1274 | K13485 | PRHOXNB, URAD            | http://www.genome.jp/dbget-bin/www_bget?ko:K13485 | path:ko00230;path:ko01100                                                                               |
| orf1276 | K00839 | E2.6.1.-B                | http://www.genome.jp/dbget-bin/www_bget?ko:K00839 |                                                                                                         |
| orf1277 | K02083 | allC                     | http://www.genome.jp/dbget-bin/www_bget?ko:K02083 | path:ko00230;path:ko01120                                                                               |
| orf1278 | K00681 | ggt                      | http://www.genome.jp/dbget-bin/www_bget?ko:K00681 | path:ko00430;path:ko00460;path:ko00480;path:ko00590;path:ko01100                                        |
| orf1279 | K02433 | gatA, QRS1               | http://www.genome.jp/dbget-bin/www_bget?ko:K02433 | path:ko00970;path:ko01100                                                                               |
| orf1281 | K00100 | E1.1.1.-                 | http://www.genome.jp/dbget-bin/www_bget?ko:K00100 | path:ko00051;path:ko00363;path:ko00591;path:ko00625;path:ko00650;path:ko01100;path:ko01120              |
| orf1283 | K07402 | xdhC                     | http://www.genome.jp/dbget-bin/www_bget?ko:K07402 |                                                                                                         |
| orf1284 | K13482 | xdhB                     | http://www.genome.jp/dbget-bin/www_bget?ko:K13482 | path:ko00230;path:ko01100;path:ko01120                                                                  |
| orf1285 | K13481 | xdhA                     | http://www.genome.jp/dbget-bin/www_bget?ko:K13481 | path:ko00230;path:ko01100;path:ko01120                                                                  |
| orf1287 | K01464 | DPYS, dht, hydA          | http://www.genome.jp/dbget-bin/www_bget?ko:K01464 | path:ko00240;path:ko00410;path:ko00770;path:ko00983;path:ko01100                                        |
| orf1288 | K01524 | ppx-gppA                 | http://www.genome.jp/dbget-bin/www_bget?ko:K01524 | path:ko00230                                                                                            |
| orf1289 | K00937 | ppk                      | http://www.genome.jp/dbget-bin/www_bget?ko:K00937 | path:ko00190;path:ko03018                                                                               |
| orf1291 | K01933 | purM                     | http://www.genome.jp/dbget-bin/www_bget?ko:K01933 | path:ko00230;path:ko01100;path:ko01110                                                                  |
| orf1292 | K11175 | purN                     | http://www.genome.jp/dbget-bin/www_bget?ko:K11175 | path:ko00230;path:ko00670;path:ko01100;path:ko01110                                                     |
| orf1293 | K00940 | E2.7.4.6, ndk            | http://www.genome.jp/dbget-bin/www_bget?ko:K00940 | path:ko00230;path:ko00240;path:ko01100;path:ko01110                                                     |
| orf1294 | K06158 | ABCF3                    | http://www.genome.jp/dbget-bin/www_bget?ko:K06158 |                                                                                                         |
| orf1298 | K08156 | araJ                     | http://www.genome.jp/dbget-bin/www_bget?ko:K08156 |                                                                                                         |
| orf1303 | K13013 | wbqV                     | http://www.genome.jp/dbget-bin/www_bget?ko:K13013 |                                                                                                         |
| orf1307 | K01255 | CARP, pepA               | http://www.genome.jp/dbget-bin/www_bget?ko:K01255 | path:ko00480;path:ko01100                                                                               |
| orf1308 | K17675 | SUPV3L1, SUV3            | http://www.genome.jp/dbget-bin/www_bget?ko:K17675 |                                                                                                         |
| orf1309 | K04762 | hslR                     | http://www.genome.jp/dbget-bin/www_bget?ko:K04762 |                                                                                                         |
| orf1310 | K05524 | fdxA                     | http://www.genome.jp/dbget-bin/www_bget?ko:K05524 |                                                                                                         |
| orf1311 | K02300 | cyoD                     | http://www.genome.jp/dbget-bin/www_bget?ko:K02300 | path:ko00190;path:ko01100                                                                               |
| orf1312 | K02299 | cyoC                     | http://www.genome.jp/dbget-bin/www_bget?ko:K02299 | path:ko00190;path:ko01100                                                                               |
| orf1313 | K02298 | cyoB                     | http://www.genome.jp/dbget-bin/www_bget?ko:K02298 | path:ko00190;path:ko01100                                                                               |
| orf1314 | K02297 | cyoA                     | http://www.genome.jp/dbget-bin/www_bget?ko:K02297 | path:ko00190;path:ko01100                                                                               |
| orf1315 | K06890 | K06890                   | http://www.genome.jp/dbget-bin/www_bget?ko:K06890 |                                                                                                         |
| orf1316 | K01975 | ligT                     | http://www.genome.jp/dbget-bin/www_bget?ko:K01975 |                                                                                                         |
| orf1317 | K00114 | exaA                     | http://www.genome.jp/dbget-bin/www_bget?ko:K00114 | path:ko00010;path:ko00625;path:ko01100;path:ko01110;path:ko01120                                        |
| orf1319 | K12410 | npdA                     | http://www.genome.jp/dbget-bin/www_bget?ko:K12410 |                                                                                                         |
| orf1321 | K05595 | marC                     | http://www.genome.jp/dbget-bin/www_bget?ko:K05595 |                                                                                                         |
| orf1322 | K14205 | mprF, fmtC               | http://www.genome.jp/dbget-bin/www_bget?ko:K14205 | path:ko05150                                                                                            |
| orf1323 | K04566 | lysK                     | http://www.genome.jp/dbget-bin/www_bget?ko:K04566 | path:ko00970                                                                                            |
| orf1324 | K03722 | dinG                     | http://www.genome.jp/dbget-bin/www_bget?ko:K03722 |                                                                                                         |
| orf1325 | K03704 | cspA                     | http://www.genome.jp/dbget-bin/www_bget?ko:K03704 |                                                                                                         |
| orf1326 | K04077 | groEL, HSPD1             | http://www.genome.jp/dbget-bin/www_bget?ko:K04077 | path:ko03018;path:ko04940;path:ko05134;path:ko05152                                                     |
| orf1327 | K04078 | groES, HSPE1             | http://www.genome.jp/dbget-bin/www_bget?ko:K04078 |                                                                                                         |
| orf1328 | K01061 | E3.1.1.45                | http://www.genome.jp/dbget-bin/www_bget?ko:K01061 | path:ko00361;path:ko00364;path:ko00623;path:ko01100;path:ko01110;path:ko01120                           |
| orf1329 | K00772 | E2.4.2.28, mtaP          | http://www.genome.jp/dbget-bin/www_bget?ko:K00772 | path:ko00270;path:ko01100                                                                               |
| orf1330 | K00413 | CYC1, CYT1, petC         | http://www.genome.jp/dbget-bin/www_bget?ko:K00413 | path:ko00190;path:ko01100;path:ko02020;path:ko04260;path:ko04932;path:ko05010;path:ko05012;path:ko05016 |
| orf1331 | K00228 | CPOX, hemF               | http://www.genome.jp/dbget-bin/www_bget?ko:K00228 | path:ko00860;path:ko01100;path:ko01110                                                                  |
| orf1336 | K00428 | E1.11.1.5                | http://www.genome.jp/dbget-bin/www_bget?ko:K00428 |                                                                                                         |
| orf1338 | K08304 | mltA                     | http://www.genome.jp/dbget-bin/www_bget?ko:K08304 |                                                                                                         |
| orf1340 | K03071 | secB                     | http://www.genome.jp/dbget-bin/www_bget?ko:K03071 | path:ko03060;path:ko03070                                                                               |
| orf1341 | K01719 | hemD, UROS               | http://www.genome.jp/dbget-bin/www_bget?ko:K01719 | path:ko00860;path:ko01100;path:ko01110                                                                  |
| orf1342 | K01749 | hemC, HMBS               | http://www.genome.jp/dbget-bin/www_bget?ko:K01749 | path:ko00860;path:ko01100;path:ko01110                                                                  |
| orf1343 | K01409 | gcp, QRI7, OSGEPL, tsalD | http://www.genome.jp/dbget-bin/www_bget?ko:K01409 |                                                                                                         |
| orf1344 | K00057 | gpsA                     | http://www.genome.jp/dbget-bin/www_bget?ko:K00057 | path:ko00564                                                                                            |
| orf1345 | K00432 | E1.11.1.9                | http://www.genome.jp/dbget-bin/www_bget?ko:K00432 | path:ko00480;path:ko00590;path:ko04918                                                                  |
| orf1346 | K03980 | mviN                     | http://www.genome.jp/dbget-bin/www_bget?ko:K03980 | path:ko00550                                                                                            |
| orf1347 | K03555 | mutS                     | http://www.genome.jp/dbget-bin/www_bget?ko:K03555 | path:ko03430                                                                                            |
| orf1348 | K00990 | glnD                     | http://www.genome.jp/dbget-bin/www_bget?ko:K00990 | path:ko02020                                                                                            |
| orf1351 | K01299 | E3.4.17.19               | http://www.genome.jp/dbget-bin/www_bget?ko:K01299 |                                                                                                         |
| orf1353 | K01733 | thrC                     | http://www.genome.jp/dbget-bin/www_bget?ko:K01733 | path:ko00260;path:ko00750;path:ko01100;path:ko01120;path:ko01230                                        |
| orf1355 | K03592 | pmbA                     | http://www.genome.jp/dbget-bin/www_bget?ko:K03592 |                                                                                                         |
| orf1358 | K02301 | cyoE                     | http://www.genome.jp/dbget-bin/www_bget?ko:K02301 | path:ko00190;path:ko00860;path:ko01100;path:ko01110                                                     |

|         |        |                             |                                                   |                                                                                                                                       |
|---------|--------|-----------------------------|---------------------------------------------------|---------------------------------------------------------------------------------------------------------------------------------------|
| orf1359 | K02274 | coxA                        | http://www.genome.jp/dbget-bin/www_bget?ko:K02274 | path:ko00190;path:ko01100                                                                                                             |
| orf1361 | K00570 | pmtA                        | http://www.genome.jp/dbget-bin/www_bget?ko:K00570 | path:ko00564;path:ko01100                                                                                                             |
| orf1362 | K01920 | E6.3.2.3, gshB              | http://www.genome.jp/dbget-bin/www_bget?ko:K01920 | path:ko00480;path:ko01100                                                                                                             |
| orf1364 | K04760 | greB                        | http://www.genome.jp/dbget-bin/www_bget?ko:K04760 |                                                                                                                                       |
| orf1366 | K03702 | uvrB                        | http://www.genome.jp/dbget-bin/www_bget?ko:K03702 | path:ko03420                                                                                                                          |
| orf1368 | K08602 | pepF, pepB                  | http://www.genome.jp/dbget-bin/www_bget?ko:K08602 |                                                                                                                                       |
| orf1369 | K00265 | gltB                        | http://www.genome.jp/dbget-bin/www_bget?ko:K00265 | path:ko00250;path:ko00910;path:ko01100;path:ko01110;path:ko01120;path:ko01230                                                         |
| orf1370 | K00266 | gltD                        | http://www.genome.jp/dbget-bin/www_bget?ko:K00266 | path:ko00250;path:ko00910;path:ko01100;path:ko01110;path:ko01120;path:ko01230                                                         |
| orf1371 | K00329 | E1.6.5.3                    | http://www.genome.jp/dbget-bin/www_bget?ko:K00329 | path:ko00190                                                                                                                          |
| orf1373 | K03684 | rnd                         | http://www.genome.jp/dbget-bin/www_bget?ko:K03684 |                                                                                                                                       |
| orf1375 | K06041 | E5.3.1.13                   | http://www.genome.jp/dbget-bin/www_bget?ko:K06041 |                                                                                                                                       |
| orf1376 | K11719 | lptC                        | http://www.genome.jp/dbget-bin/www_bget?ko:K11719 |                                                                                                                                       |
| orf1377 | K09774 | lptA                        | http://www.genome.jp/dbget-bin/www_bget?ko:K09774 |                                                                                                                                       |
| orf1378 | K06861 | lptB                        | http://www.genome.jp/dbget-bin/www_bget?ko:K06861 | path:ko02010                                                                                                                          |
| orf1383 | K01462 | PDF, def                    | http://www.genome.jp/dbget-bin/www_bget?ko:K01462 |                                                                                                                                       |
| orf1384 | K00604 | MTFMT, fmt                  | http://www.genome.jp/dbget-bin/www_bget?ko:K00604 | path:ko00670;path:ko00970                                                                                                             |
| orf1385 | K06173 | truA, PUS1                  | http://www.genome.jp/dbget-bin/www_bget?ko:K06173 |                                                                                                                                       |
| orf1387 | K01439 | dapE                        | http://www.genome.jp/dbget-bin/www_bget?ko:K01439 | path:ko00300;path:ko01100;path:ko01120;path:ko01230                                                                                   |
| orf1388 | K00674 | dapD                        | http://www.genome.jp/dbget-bin/www_bget?ko:K00674 | path:ko00300;path:ko01100;path:ko01120;path:ko01230                                                                                   |
| orf1390 | K00930 | argB                        | http://www.genome.jp/dbget-bin/www_bget?ko:K00930 | path:ko00330;path:ko01100;path:ko01110;path:ko01210;path:ko01230                                                                      |
| orf1391 | K03978 | engB                        | http://www.genome.jp/dbget-bin/www_bget?ko:K03978 |                                                                                                                                       |
| orf1392 | K03217 | yidC, spoIIIJ, OXA1         | http://www.genome.jp/dbget-bin/www_bget?ko:K03217 | path:ko03060;path:ko03070                                                                                                             |
| orf1393 | K08998 | K08998                      | http://www.genome.jp/dbget-bin/www_bget?ko:K08998 |                                                                                                                                       |
| orf1394 | K03536 | rnpA                        | http://www.genome.jp/dbget-bin/www_bget?ko:K03536 |                                                                                                                                       |
| orf1396 | K01759 | E4.4.1.5, GLO1, gloA        | http://www.genome.jp/dbget-bin/www_bget?ko:K01759 | path:ko00620;path:ko04011                                                                                                             |
| orf1397 | K09949 | K09949                      | http://www.genome.jp/dbget-bin/www_bget?ko:K09949 |                                                                                                                                       |
| orf1398 | K00677 | lpxA                        | http://www.genome.jp/dbget-bin/www_bget?ko:K00677 | path:ko00540;path:ko01100                                                                                                             |
| orf1399 | K02372 | fabZ                        | http://www.genome.jp/dbget-bin/www_bget?ko:K02372 | path:ko00061;path:ko00780;path:ko01100;path:ko01212                                                                                   |
| orf1400 | K02536 | lpxD                        | http://www.genome.jp/dbget-bin/www_bget?ko:K02536 | path:ko00540;path:ko01100                                                                                                             |
| orf1402 | K07277 | SAM50, TOB55, bamA          | http://www.genome.jp/dbget-bin/www_bget?ko:K07277 |                                                                                                                                       |
| orf1403 | K11749 | rseP                        | http://www.genome.jp/dbget-bin/www_bget?ko:K11749 | path:ko04112                                                                                                                          |
| orf1404 | K00099 | dxr                         | http://www.genome.jp/dbget-bin/www_bget?ko:K00099 | path:ko00900;path:ko01100;path:ko01110                                                                                                |
| orf1405 | K00981 | E2.7.7.41, CDS1, CDS2, cdsA | http://www.genome.jp/dbget-bin/www_bget?ko:K00981 | path:ko00564;path:ko01100;path:ko04070                                                                                                |
| orf1406 | K00806 | uppS                        | http://www.genome.jp/dbget-bin/www_bget?ko:K00806 | path:ko00900;path:ko01110                                                                                                             |
| orf1407 | K02838 | frr, MRRF, RRF              | http://www.genome.jp/dbget-bin/www_bget?ko:K02838 |                                                                                                                                       |
| orf1408 | K09903 | pyrH                        | http://www.genome.jp/dbget-bin/www_bget?ko:K09903 | path:ko00240;path:ko01100                                                                                                             |
| orf1409 | K03595 | era                         | http://www.genome.jp/dbget-bin/www_bget?ko:K03595 |                                                                                                                                       |
| orf1410 | K03685 | rnc, DROSHA, RNT1           | http://www.genome.jp/dbget-bin/www_bget?ko:K03685 | path:ko03008;path:ko05205                                                                                                             |
| orf1411 | K03100 | lepB                        | http://www.genome.jp/dbget-bin/www_bget?ko:K03100 | path:ko03060                                                                                                                          |
| orf1412 | K00997 | acpS                        | http://www.genome.jp/dbget-bin/www_bget?ko:K00997 | path:ko00770                                                                                                                          |
| orf1413 | K00951 | relA                        | http://www.genome.jp/dbget-bin/www_bget?ko:K00951 | path:ko00230                                                                                                                          |
| orf1414 | K03060 | rpoZ                        | http://www.genome.jp/dbget-bin/www_bget?ko:K03060 | path:ko00230;path:ko00240;path:ko01100;path:ko03020                                                                                   |
| orf1415 | K00950 | folK                        | http://www.genome.jp/dbget-bin/www_bget?ko:K00950 | path:ko00790;path:ko01100                                                                                                             |
| orf1417 | K00116 | mgo                         | http://www.genome.jp/dbget-bin/www_bget?ko:K00116 | path:ko00020;path:ko00620;path:ko01100;path:ko01110;path:ko01120;path:ko01200                                                         |
| orf1419 | K00625 | E2.3.1.8, pta               | http://www.genome.jp/dbget-bin/www_bget?ko:K00625 | path:ko00430;path:ko00620;path:ko00640;path:ko00680;path:ko00720;path:ko01100;path:ko01120;path:ko01200                               |
| orf1421 | K02291 | crtB                        | http://www.genome.jp/dbget-bin/www_bget?ko:K02291 | path:ko00906;path:ko01100;path:ko01110                                                                                                |
| orf1422 | K04564 | SOD2                        | http://www.genome.jp/dbget-bin/www_bget?ko:K04564 | path:ko04068;path:ko04146;path:ko05016                                                                                                |
| orf1423 | K08137 | galP                        | http://www.genome.jp/dbget-bin/www_bget?ko:K08137 |                                                                                                                                       |
| orf1424 | K03210 | yajC                        | http://www.genome.jp/dbget-bin/www_bget?ko:K03210 | path:ko03060;path:ko03070                                                                                                             |
| orf1425 | K06923 | K06923                      | http://www.genome.jp/dbget-bin/www_bget?ko:K06923 |                                                                                                                                       |
| orf1427 | K03574 | mutT, NUDT15, MTH2          | http://www.genome.jp/dbget-bin/www_bget?ko:K03574 |                                                                                                                                       |
| orf1430 | K01962 | accA                        | http://www.genome.jp/dbget-bin/www_bget?ko:K01962 | path:ko00061;path:ko00253;path:ko00620;path:ko00640;path:ko00720;path:ko01100;path:ko01110;path:ko01120<br>;path:ko01200;path:ko01212 |
| orf1431 | K04763 | xerD                        | http://www.genome.jp/dbget-bin/www_bget?ko:K04763 |                                                                                                                                       |
| orf1433 | K13829 | aroKB                       | http://www.genome.jp/dbget-bin/www_bget?ko:K13829 | path:ko00400;path:ko01100;path:ko01110;path:ko01230                                                                                   |
| orf1436 | K05349 | bglX                        | http://www.genome.jp/dbget-bin/www_bget?ko:K05349 | path:ko00460;path:ko00500;path:ko00940;path:ko01100;path:ko01110                                                                      |

|         |        |                              |                                                                                                                   |                                                                                                         |
|---------|--------|------------------------------|-------------------------------------------------------------------------------------------------------------------|---------------------------------------------------------------------------------------------------------|
| orf1440 | K02495 | hemN, hemZ                   | <a href="http://www.genome.jp/dbget-bin/www_bget?ko:K02495">http://www.genome.jp/dbget-bin/www_bget?ko:K02495</a> | path:ko00860;path:ko01100;path:ko01110                                                                  |
| orf1442 | K03549 | kup                          | <a href="http://www.genome.jp/dbget-bin/www_bget?ko:K03549">http://www.genome.jp/dbget-bin/www_bget?ko:K03549</a> |                                                                                                         |
| orf1443 | K06997 | K06997                       | <a href="http://www.genome.jp/dbget-bin/www_bget?ko:K06997">http://www.genome.jp/dbget-bin/www_bget?ko:K06997</a> |                                                                                                         |
| orf1444 | K03500 | rsmB, sun                    | <a href="http://www.genome.jp/dbget-bin/www_bget?ko:K03500">http://www.genome.jp/dbget-bin/www_bget?ko:K03500</a> |                                                                                                         |
| orf1445 | K01783 | rpe, RPE                     | <a href="http://www.genome.jp/dbget-bin/www_bget?ko:K01783">http://www.genome.jp/dbget-bin/www_bget?ko:K01783</a> | path:ko00030;path:ko00040;path:ko00710;path:ko01100;path:ko01110;path:ko01120;path:ko01200;path:ko01230 |
| orf1449 | K01269 | E3.4.11.-                    | <a href="http://www.genome.jp/dbget-bin/www_bget?ko:K01269">http://www.genome.jp/dbget-bin/www_bget?ko:K01269</a> |                                                                                                         |
| orf1453 | K01866 | YARS, tyrS                   | <a href="http://www.genome.jp/dbget-bin/www_bget?ko:K01866">http://www.genome.jp/dbget-bin/www_bget?ko:K01866</a> | path:ko00970                                                                                            |
| orf1454 | K07018 | K07018                       | <a href="http://www.genome.jp/dbget-bin/www_bget?ko:K07018">http://www.genome.jp/dbget-bin/www_bget?ko:K07018</a> |                                                                                                         |
| orf1456 | K04487 | iscS, NFS1                   | <a href="http://www.genome.jp/dbget-bin/www_bget?ko:K04487">http://www.genome.jp/dbget-bin/www_bget?ko:K04487</a> | path:ko00730;path:ko01100;path:ko04122                                                                  |
| orf1457 | K04487 | iscS, NFS1                   | <a href="http://www.genome.jp/dbget-bin/www_bget?ko:K04487">http://www.genome.jp/dbget-bin/www_bget?ko:K04487</a> | path:ko00730;path:ko01100;path:ko04122                                                                  |
| orf1458 | K04755 | fdx                          | <a href="http://www.genome.jp/dbget-bin/www_bget?ko:K04755">http://www.genome.jp/dbget-bin/www_bget?ko:K04755</a> |                                                                                                         |
| orf1459 | K00566 | mnmA, trmU, TRMU             | <a href="http://www.genome.jp/dbget-bin/www_bget?ko:K00566">http://www.genome.jp/dbget-bin/www_bget?ko:K00566</a> | path:ko04122                                                                                            |
| orf1460 | K04097 | gst                          | <a href="http://www.genome.jp/dbget-bin/www_bget?ko:K04097">http://www.genome.jp/dbget-bin/www_bget?ko:K04097</a> | path:ko00480                                                                                            |
| orf1465 | K00754 | E2.4.1.-                     | <a href="http://www.genome.jp/dbget-bin/www_bget?ko:K00754">http://www.genome.jp/dbget-bin/www_bget?ko:K00754</a> | path:ko00051                                                                                            |
| orf1468 | K16264 | czcD, zitB                   | <a href="http://www.genome.jp/dbget-bin/www_bget?ko:K16264">http://www.genome.jp/dbget-bin/www_bget?ko:K16264</a> |                                                                                                         |
| orf1469 | K07137 | K07137                       | <a href="http://www.genome.jp/dbget-bin/www_bget?ko:K07137">http://www.genome.jp/dbget-bin/www_bget?ko:K07137</a> |                                                                                                         |
| orf1470 | K04066 | priA                         | <a href="http://www.genome.jp/dbget-bin/www_bget?ko:K04066">http://www.genome.jp/dbget-bin/www_bget?ko:K04066</a> | path:ko03440                                                                                            |
| orf1471 | K03733 | xerC                         | <a href="http://www.genome.jp/dbget-bin/www_bget?ko:K03733">http://www.genome.jp/dbget-bin/www_bget?ko:K03733</a> |                                                                                                         |
| orf1472 | K01259 | pip                          | <a href="http://www.genome.jp/dbget-bin/www_bget?ko:K01259">http://www.genome.jp/dbget-bin/www_bget?ko:K01259</a> | path:ko00330                                                                                            |
| orf1475 | K04752 | glnK                         | <a href="http://www.genome.jp/dbget-bin/www_bget?ko:K04752">http://www.genome.jp/dbget-bin/www_bget?ko:K04752</a> |                                                                                                         |
| orf1476 | K03185 | ubiH                         | <a href="http://www.genome.jp/dbget-bin/www_bget?ko:K03185">http://www.genome.jp/dbget-bin/www_bget?ko:K03185</a> | path:ko00130;path:ko01100;path:ko01110                                                                  |
| orf1477 | K00640 | cysE                         | <a href="http://www.genome.jp/dbget-bin/www_bget?ko:K00640">http://www.genome.jp/dbget-bin/www_bget?ko:K00640</a> | path:ko00270;path:ko00920;path:ko01100;path:ko01120;path:ko01200;path:ko01230                           |
| orf1478 | K07007 | K07007                       | <a href="http://www.genome.jp/dbget-bin/www_bget?ko:K07007">http://www.genome.jp/dbget-bin/www_bget?ko:K07007</a> |                                                                                                         |
| orf1479 | K06915 | K06915                       | <a href="http://www.genome.jp/dbget-bin/www_bget?ko:K06915">http://www.genome.jp/dbget-bin/www_bget?ko:K06915</a> |                                                                                                         |
| orf1481 | K08300 | rne                          | <a href="http://www.genome.jp/dbget-bin/www_bget?ko:K08300">http://www.genome.jp/dbget-bin/www_bget?ko:K08300</a> | path:ko03018                                                                                            |
| orf1485 | K01448 | E3.5.1.28B, amiA, amiB, amiC | <a href="http://www.genome.jp/dbget-bin/www_bget?ko:K01448">http://www.genome.jp/dbget-bin/www_bget?ko:K01448</a> |                                                                                                         |
| orf1486 | K01649 | leuA                         | <a href="http://www.genome.jp/dbget-bin/www_bget?ko:K01649">http://www.genome.jp/dbget-bin/www_bget?ko:K01649</a> | path:ko00290;path:ko00620;path:ko01100;path:ko01110;path:ko01210;path:ko01230                           |
| orf1489 | K03569 | mreB                         | <a href="http://www.genome.jp/dbget-bin/www_bget?ko:K03569">http://www.genome.jp/dbget-bin/www_bget?ko:K03569</a> |                                                                                                         |
| orf1490 | K03570 | mreC                         | <a href="http://www.genome.jp/dbget-bin/www_bget?ko:K03570">http://www.genome.jp/dbget-bin/www_bget?ko:K03570</a> |                                                                                                         |
| orf1491 | K03571 | mreD                         | <a href="http://www.genome.jp/dbget-bin/www_bget?ko:K03571">http://www.genome.jp/dbget-bin/www_bget?ko:K03571</a> |                                                                                                         |
| orf1492 | K05515 | mrdA                         | <a href="http://www.genome.jp/dbget-bin/www_bget?ko:K05515">http://www.genome.jp/dbget-bin/www_bget?ko:K05515</a> | path:ko00312;path:ko00550                                                                               |
| orf1493 | K05837 | rodA, mrdB                   | <a href="http://www.genome.jp/dbget-bin/www_bget?ko:K05837">http://www.genome.jp/dbget-bin/www_bget?ko:K05837</a> |                                                                                                         |
| orf1495 | K01879 | glyS                         | <a href="http://www.genome.jp/dbget-bin/www_bget?ko:K01879">http://www.genome.jp/dbget-bin/www_bget?ko:K01879</a> | path:ko00970                                                                                            |
| orf1496 | K01878 | glyQ                         | <a href="http://www.genome.jp/dbget-bin/www_bget?ko:K01878">http://www.genome.jp/dbget-bin/www_bget?ko:K01878</a> | path:ko00970                                                                                            |
| orf1497 | K09945 | K09945                       | <a href="http://www.genome.jp/dbget-bin/www_bget?ko:K09945">http://www.genome.jp/dbget-bin/www_bget?ko:K09945</a> |                                                                                                         |
| orf1498 | K03919 | alkB                         | <a href="http://www.genome.jp/dbget-bin/www_bget?ko:K03919">http://www.genome.jp/dbget-bin/www_bget?ko:K03919</a> |                                                                                                         |
| orf1499 | K01625 | eda                          | <a href="http://www.genome.jp/dbget-bin/www_bget?ko:K01625">http://www.genome.jp/dbget-bin/www_bget?ko:K01625</a> | path:ko00030;path:ko00630;path:ko01100;path:ko01120;path:ko01200                                        |
| orf1500 | K01690 | edd                          | <a href="http://www.genome.jp/dbget-bin/www_bget?ko:K01690">http://www.genome.jp/dbget-bin/www_bget?ko:K01690</a> | path:ko00030;path:ko01100;path:ko01120;path:ko01200                                                     |
| orf1504 | K00954 | E2.7.7.3A, coaD, kdtB        | <a href="http://www.genome.jp/dbget-bin/www_bget?ko:K00954">http://www.genome.jp/dbget-bin/www_bget?ko:K00954</a> | path:ko00770;path:ko01100                                                                               |
| orf1505 | K02469 | gyrA                         | <a href="http://www.genome.jp/dbget-bin/www_bget?ko:K02469">http://www.genome.jp/dbget-bin/www_bget?ko:K02469</a> |                                                                                                         |
| orf1506 | K02469 | gyrA                         | <a href="http://www.genome.jp/dbget-bin/www_bget?ko:K02469">http://www.genome.jp/dbget-bin/www_bget?ko:K02469</a> |                                                                                                         |
| orf1507 | K03111 | ssb                          | <a href="http://www.genome.jp/dbget-bin/www_bget?ko:K03111">http://www.genome.jp/dbget-bin/www_bget?ko:K03111</a> | path:ko03030;path:ko03430;path:ko03440                                                                  |
| orf1508 | K03701 | uvrA                         | <a href="http://www.genome.jp/dbget-bin/www_bget?ko:K03701">http://www.genome.jp/dbget-bin/www_bget?ko:K03701</a> | path:ko03420                                                                                            |
| orf1509 | K01611 | speD, AMD1                   | <a href="http://www.genome.jp/dbget-bin/www_bget?ko:K01611">http://www.genome.jp/dbget-bin/www_bget?ko:K01611</a> | path:ko00270;path:ko00330;path:ko01100                                                                  |
| orf1510 | K00797 | speE, SRM                    | <a href="http://www.genome.jp/dbget-bin/www_bget?ko:K00797">http://www.genome.jp/dbget-bin/www_bget?ko:K00797</a> | path:ko00270;path:ko00330;path:ko00410;path:ko00480;path:ko01100                                        |
| orf1512 | K00605 | gcvT, AMT                    | <a href="http://www.genome.jp/dbget-bin/www_bget?ko:K00605">http://www.genome.jp/dbget-bin/www_bget?ko:K00605</a> | path:ko00260;path:ko00670;path:ko01100;path:ko01200                                                     |
| orf1514 | K02437 | gcvH, GCSH                   | <a href="http://www.genome.jp/dbget-bin/www_bget?ko:K02437">http://www.genome.jp/dbget-bin/www_bget?ko:K02437</a> | path:ko00260;path:ko00630;path:ko01110                                                                  |
| orf1515 | K00281 | GLDC, gcvP                   | <a href="http://www.genome.jp/dbget-bin/www_bget?ko:K00281">http://www.genome.jp/dbget-bin/www_bget?ko:K00281</a> | path:ko00260;path:ko01100;path:ko01200                                                                  |
| orf1516 | K02016 | ABC.FEV.S                    | <a href="http://www.genome.jp/dbget-bin/www_bget?ko:K02016">http://www.genome.jp/dbget-bin/www_bget?ko:K02016</a> | path:ko02010                                                                                            |
| orf1517 | K02015 | ABC.FEV.P                    | <a href="http://www.genome.jp/dbget-bin/www_bget?ko:K02015">http://www.genome.jp/dbget-bin/www_bget?ko:K02015</a> | path:ko02010                                                                                            |
| orf1518 | K02013 | ABC.FEV.A                    | <a href="http://www.genome.jp/dbget-bin/www_bget?ko:K02013">http://www.genome.jp/dbget-bin/www_bget?ko:K02013</a> | path:ko02010                                                                                            |
| orf1522 | K01759 | E4.4.1.5, GLO1, gloA         | <a href="http://www.genome.jp/dbget-bin/www_bget?ko:K01759">http://www.genome.jp/dbget-bin/www_bget?ko:K01759</a> | path:ko00620;path:ko04011                                                                               |
| orf1523 | K01778 | dapF                         | <a href="http://www.genome.jp/dbget-bin/www_bget?ko:K01778">http://www.genome.jp/dbget-bin/www_bget?ko:K01778</a> | path:ko00300;path:ko01100;path:ko01110;path:ko01120;path:ko01230                                        |
| orf1525 | K03110 | ftsY                         | <a href="http://www.genome.jp/dbget-bin/www_bget?ko:K03110">http://www.genome.jp/dbget-bin/www_bget?ko:K03110</a> | path:ko03060;path:ko03070                                                                               |
| orf1526 | K00927 | PGK, pgk                     | <a href="http://www.genome.jp/dbget-bin/www_bget?ko:K00927">http://www.genome.jp/dbget-bin/www_bget?ko:K00927</a> | path:ko00010;path:ko00710;path:ko01100;path:ko01110;path:ko01120;path:ko01200;path:ko01230              |

|         |        |                             |                                                   |                                                                                                                      |
|---------|--------|-----------------------------|---------------------------------------------------|----------------------------------------------------------------------------------------------------------------------|
| orf1527 | K00134 | GAPDH, gapA                 | http://www.genome.jp/dbget-bin/www_bget?ko:K00134 | path:ko00010;path:ko00710;path:ko01100;path:ko01110;path:ko01120;path:ko01200;path:ko01230;path:ko04066;path:ko05010 |
| orf1528 | K00615 | E2.2.1.1, tktA, tktB        | http://www.genome.jp/dbget-bin/www_bget?ko:K00615 | path:ko00030;path:ko00710;path:ko01051;path:ko01100;path:ko01110;path:ko01120;path:ko01200;path:ko01230              |
| orf1530 | K00643 | E2.3.1.37, ALAS             | http://www.genome.jp/dbget-bin/www_bget?ko:K00643 | path:ko00260;path:ko00860;path:ko01100                                                                               |
| orf1532 | K00681 | ggt                         | http://www.genome.jp/dbget-bin/www_bget?ko:K00681 | path:ko00430;path:ko00460;path:ko00480;path:ko00590;path:ko01100                                                     |
| orf1533 | K03553 | recA                        | http://www.genome.jp/dbget-bin/www_bget?ko:K03553 | path:ko03440                                                                                                         |
| orf1536 | K00050 | ttuD                        | http://www.genome.jp/dbget-bin/www_bget?ko:K00050 | path:ko00260;path:ko00630;path:ko01100                                                                               |
| orf1537 | K00867 | coaA                        | http://www.genome.jp/dbget-bin/www_bget?ko:K00867 | path:ko00770;path:ko01100                                                                                            |
| orf1540 | K07248 | aldA                        | http://www.genome.jp/dbget-bin/www_bget?ko:K07248 | path:ko00620;path:ko00630;path:ko01120                                                                               |
| orf1542 | K03594 | bfr                         | http://www.genome.jp/dbget-bin/www_bget?ko:K03594 |                                                                                                                      |
| orf1544 | K03608 | minE                        | http://www.genome.jp/dbget-bin/www_bget?ko:K03608 |                                                                                                                      |
| orf1545 | K03609 | minD                        | http://www.genome.jp/dbget-bin/www_bget?ko:K03609 |                                                                                                                      |
| orf1546 | K03610 | minC                        | http://www.genome.jp/dbget-bin/www_bget?ko:K03610 |                                                                                                                      |
| orf1547 | K00799 | GST, gst                    | http://www.genome.jp/dbget-bin/www_bget?ko:K00799 | path:ko00480;path:ko00980;path:ko00982;path:ko05204                                                                  |
| orf1548 | K07007 | K07007                      | http://www.genome.jp/dbget-bin/www_bget?ko:K07007 |                                                                                                                      |
| orf1550 | K07478 | ycaJ                        | http://www.genome.jp/dbget-bin/www_bget?ko:K07478 |                                                                                                                      |
| orf1551 | K06179 | rluC                        | http://www.genome.jp/dbget-bin/www_bget?ko:K06179 |                                                                                                                      |
| orf1552 | K07289 | asmA                        | http://www.genome.jp/dbget-bin/www_bget?ko:K07289 |                                                                                                                      |
| orf1554 | K12506 | ispDF                       | http://www.genome.jp/dbget-bin/www_bget?ko:K12506 | path:ko00900;path:ko01100;path:ko01110                                                                               |
| orf1556 | K05540 | dusB                        | http://www.genome.jp/dbget-bin/www_bget?ko:K05540 |                                                                                                                      |
| orf1557 | K07708 | glnL, ntrB                  | http://www.genome.jp/dbget-bin/www_bget?ko:K07708 | path:ko02020                                                                                                         |
| orf1558 | K07712 | glnG, ntrC                  | http://www.genome.jp/dbget-bin/www_bget?ko:K07712 | path:ko02020                                                                                                         |
| orf1559 | K13598 | ntrY                        | http://www.genome.jp/dbget-bin/www_bget?ko:K13598 | path:ko02020                                                                                                         |
| orf1560 | K13599 | ntrX                        | http://www.genome.jp/dbget-bin/www_bget?ko:K13599 | path:ko02020                                                                                                         |
| orf1561 | K03666 | hfq                         | http://www.genome.jp/dbget-bin/www_bget?ko:K03666 | path:ko03018                                                                                                         |
| orf1562 | K03665 | hflX                        | http://www.genome.jp/dbget-bin/www_bget?ko:K03665 |                                                                                                                      |
| orf1564 | K04765 | mazG                        | http://www.genome.jp/dbget-bin/www_bget?ko:K04765 | path:ko00230;path:ko00240;path:ko01100                                                                               |
| orf1565 | K00145 | argC                        | http://www.genome.jp/dbget-bin/www_bget?ko:K00145 | path:ko00330;path:ko01100;path:ko01110;path:ko01210;path:ko01230                                                     |
| orf1566 | K00831 | serC, PSAT1                 | http://www.genome.jp/dbget-bin/www_bget?ko:K00831 | path:ko00260;path:ko00680;path:ko00750;path:ko01100;path:ko01120;path:ko01200;path:ko01230                           |
| orf1567 | K02502 | hisZ                        | http://www.genome.jp/dbget-bin/www_bget?ko:K02502 | path:ko00340;path:ko01100;path:ko01110;path:ko01230                                                                  |
| orf1568 | K01939 | E6.3.4.4, purA              | http://www.genome.jp/dbget-bin/www_bget?ko:K01939 | path:ko00230;path:ko00250;path:ko01100                                                                               |
| orf1569 | K03089 | SIG3.3.1, rpoH              | http://www.genome.jp/dbget-bin/www_bget?ko:K03089 |                                                                                                                      |
| orf1570 | K06180 | rluD                        | http://www.genome.jp/dbget-bin/www_bget?ko:K06180 |                                                                                                                      |
| orf1575 | K01179 | E3.2.1.4                    | http://www.genome.jp/dbget-bin/www_bget?ko:K01179 | path:ko00500;path:ko01100                                                                                            |
| orf1576 | K16075 | MRS2, MFM1                  | http://www.genome.jp/dbget-bin/www_bget?ko:K16075 |                                                                                                                      |
| orf1578 | K00694 | bcsA                        | http://www.genome.jp/dbget-bin/www_bget?ko:K00694 | path:ko00500;path:ko01100                                                                                            |
| orf1579 | K00694 | bcsA                        | http://www.genome.jp/dbget-bin/www_bget?ko:K00694 | path:ko00500;path:ko01100                                                                                            |
| orf1582 | K05349 | bglX                        | http://www.genome.jp/dbget-bin/www_bget?ko:K05349 | path:ko00460;path:ko00500;path:ko00940;path:ko01100;path:ko01110                                                     |
| orf1584 | K09705 | K09705                      | http://www.genome.jp/dbget-bin/www_bget?ko:K09705 |                                                                                                                      |
| orf1587 | K04079 | htpG, HSP90A                | http://www.genome.jp/dbget-bin/www_bget?ko:K04079 | path:ko04141;path:ko04151;path:ko04612;path:ko04621;path:ko04626;path:ko04914;path:ko04915;path:ko05200;path:ko05215 |
| orf1588 | K08963 | mtnA                        | http://www.genome.jp/dbget-bin/www_bget?ko:K08963 | path:ko00270;path:ko01100                                                                                            |
| orf1590 | K01876 | DARS, aspS                  | http://www.genome.jp/dbget-bin/www_bget?ko:K01876 | path:ko00970                                                                                                         |
| orf1592 | K01142 | E3.1.11.2, xthA             | http://www.genome.jp/dbget-bin/www_bget?ko:K01142 | path:ko03410                                                                                                         |
| orf1595 | K01129 | dgt                         | http://www.genome.jp/dbget-bin/www_bget?ko:K01129 | path:ko00230                                                                                                         |
| orf1596 | K01887 | RARS, argS                  | http://www.genome.jp/dbget-bin/www_bget?ko:K01887 | path:ko00970                                                                                                         |
| orf1598 | K05896 | scpA                        | http://www.genome.jp/dbget-bin/www_bget?ko:K05896 |                                                                                                                      |
| orf1599 | K06024 | scpB                        | http://www.genome.jp/dbget-bin/www_bget?ko:K06024 |                                                                                                                      |
| orf1600 | K03117 | tatB                        | http://www.genome.jp/dbget-bin/www_bget?ko:K03117 | path:ko03060;path:ko03070                                                                                            |
| orf1601 | K03118 | tatC                        | http://www.genome.jp/dbget-bin/www_bget?ko:K03118 | path:ko03060;path:ko03070                                                                                            |
| orf1602 | K01875 | SARS, serS                  | http://www.genome.jp/dbget-bin/www_bget?ko:K01875 | path:ko00970                                                                                                         |
| orf1603 | K17675 | SUPV3L1, SUV3               | http://www.genome.jp/dbget-bin/www_bget?ko:K17675 |                                                                                                                      |
| orf1604 | K00528 | E1.18.1.2, fpr              | http://www.genome.jp/dbget-bin/www_bget?ko:K00528 |                                                                                                                      |
| orf1606 | K00383 | GSR, gor                    | http://www.genome.jp/dbget-bin/www_bget?ko:K00383 | path:ko00480;path:ko04918                                                                                            |
| orf1608 | K01626 | E2.5.1.54, aroF, aroG, aroH | http://www.genome.jp/dbget-bin/www_bget?ko:K01626 | path:ko00400;path:ko01100;path:ko01110;path:ko01230                                                                  |
| orf1609 | K00763 | pncB, NAPRT1                | http://www.genome.jp/dbget-bin/www_bget?ko:K00763 | path:ko00760;path:ko01100                                                                                            |

|         |        |                       |                                                   |                                                                                                                                   |
|---------|--------|-----------------------|---------------------------------------------------|-----------------------------------------------------------------------------------------------------------------------------------|
| orf1611 | K01885 | EARS, gltX            | http://www.genome.jp/dbget-bin/www_bget?ko:K01885 | path:ko00860;path:ko00970;path:ko01100;path:ko01110                                                                               |
| orf1612 | K02533 | lasT                  | http://www.genome.jp/dbget-bin/www_bget?ko:K02533 |                                                                                                                                   |
| orf1613 | K01883 | CARS, cysS            | http://www.genome.jp/dbget-bin/www_bget?ko:K01883 | path:ko00970                                                                                                                      |
| orf1614 | K02837 | prfC                  | http://www.genome.jp/dbget-bin/www_bget?ko:K02837 |                                                                                                                                   |
| orf1615 | K02986 | RP-S4, rpsD           | http://www.genome.jp/dbget-bin/www_bget?ko:K02986 | path:ko03010                                                                                                                      |
| orf1618 | K06988 | K06988                | http://www.genome.jp/dbget-bin/www_bget?ko:K06988 |                                                                                                                                   |
| orf1621 | K01673 | cynT, can             | http://www.genome.jp/dbget-bin/www_bget?ko:K01673 | path:ko00910                                                                                                                      |
| orf1622 | K01872 | AARS, alaS            | http://www.genome.jp/dbget-bin/www_bget?ko:K01872 | path:ko00970                                                                                                                      |
| orf1623 | K03707 | tenA                  | http://www.genome.jp/dbget-bin/www_bget?ko:K03707 | path:ko00730;path:ko01100                                                                                                         |
| orf1624 | K00433 | cpo                   | http://www.genome.jp/dbget-bin/www_bget?ko:K00433 |                                                                                                                                   |
| orf1630 | K00661 | maa                   | http://www.genome.jp/dbget-bin/www_bget?ko:K00661 |                                                                                                                                   |
| orf1631 | K09702 | K09702                | http://www.genome.jp/dbget-bin/www_bget?ko:K09702 |                                                                                                                                   |
| orf1633 | K05523 | hchA                  | http://www.genome.jp/dbget-bin/www_bget?ko:K05523 | path:ko00620;path:ko01120                                                                                                         |
| orf1639 | K02624 | pcaR                  | http://www.genome.jp/dbget-bin/www_bget?ko:K02624 |                                                                                                                                   |
| orf1640 | K00529 | hcaD                  | http://www.genome.jp/dbget-bin/www_bget?ko:K00529 | path:ko00071;path:ko00360;path:ko01120;path:ko01220                                                                               |
| orf1641 | K04755 | fdx                   | http://www.genome.jp/dbget-bin/www_bget?ko:K04755 |                                                                                                                                   |
| orf1643 | K01915 | glnA                  | http://www.genome.jp/dbget-bin/www_bget?ko:K01915 | path:ko00250;path:ko00330;path:ko00630;path:ko00910;path:ko01100;path:ko01120;path:ko01230;path:ko02020;path:ko04724;path:ko04727 |
| orf1644 | K02014 | TC.FEV.OM             | http://www.genome.jp/dbget-bin/www_bget?ko:K02014 |                                                                                                                                   |
| orf1654 | K00161 | PDHA, pdhA            | http://www.genome.jp/dbget-bin/www_bget?ko:K00161 | path:ko00010;path:ko00020;path:ko00620;path:ko01100;path:ko01110;path:ko01120;path:ko01200;path:ko04066                           |
| orf1657 | K00162 | PDHB, pdhB            | http://www.genome.jp/dbget-bin/www_bget?ko:K00162 | path:ko00010;path:ko00020;path:ko00620;path:ko01100;path:ko01110;path:ko01120;path:ko01200;path:ko04066                           |
| orf1658 | K00627 | DLAT, aceF, pdhC      | http://www.genome.jp/dbget-bin/www_bget?ko:K00627 | path:ko00010;path:ko00020;path:ko00620;path:ko01100;path:ko01110;path:ko01120;path:ko01200                                        |
| orf1659 | K00854 | xylB, XYLB            | http://www.genome.jp/dbget-bin/www_bget?ko:K00854 | path:ko00040;path:ko01100                                                                                                         |
| orf1666 | K00067 | rfbD, rmlD            | http://www.genome.jp/dbget-bin/www_bget?ko:K00067 | path:ko00521;path:ko00523;path:ko01100;path:ko01110                                                                               |
| orf1668 | K01790 | rfbC, rmlC            | http://www.genome.jp/dbget-bin/www_bget?ko:K01790 | path:ko00521;path:ko00523;path:ko01100;path:ko01110                                                                               |
| orf1669 | K01179 | E3.2.1.4              | http://www.genome.jp/dbget-bin/www_bget?ko:K01179 | path:ko00500;path:ko01100                                                                                                         |
| orf1670 | K13662 | gumE                  | http://www.genome.jp/dbget-bin/www_bget?ko:K13662 |                                                                                                                                   |
| orf1672 | K13659 | gumK                  | http://www.genome.jp/dbget-bin/www_bget?ko:K13659 |                                                                                                                                   |
| orf1675 | K16555 | exoO                  | http://www.genome.jp/dbget-bin/www_bget?ko:K16555 |                                                                                                                                   |
| orf1676 | K00012 | UGDH, ugd             | http://www.genome.jp/dbget-bin/www_bget?ko:K00012 | path:ko00040;path:ko00053;path:ko00500;path:ko00520;path:ko01100;path:ko01110                                                     |
| orf1678 | K16011 | algA, xanB, rfbA      | http://www.genome.jp/dbget-bin/www_bget?ko:K16011 | path:ko00051;path:ko00520;path:ko01100;path:ko01110                                                                               |
| orf1680 | K05946 | E2.4.1.187, tagA      | http://www.genome.jp/dbget-bin/www_bget?ko:K05946 |                                                                                                                                   |
| orf1681 | K16692 | etk-wzc               | http://www.genome.jp/dbget-bin/www_bget?ko:K16692 |                                                                                                                                   |
| orf1682 | K13657 | gumH                  | http://www.genome.jp/dbget-bin/www_bget?ko:K13657 |                                                                                                                                   |
| orf1685 | K01991 | ABC-2.OM, wza         | http://www.genome.jp/dbget-bin/www_bget?ko:K01991 |                                                                                                                                   |
| orf1687 | K01710 | E4.2.1.46, rfbB, rffG | http://www.genome.jp/dbget-bin/www_bget?ko:K01710 | path:ko00521;path:ko00523;path:ko01055;path:ko01100;path:ko01110                                                                  |
| orf1688 | K00973 | E2.7.7.24, rfbA, rffH | http://www.genome.jp/dbget-bin/www_bget?ko:K00973 | path:ko00521;path:ko00523;path:ko01100;path:ko01110                                                                               |
| orf1697 | K12972 | ghrA                  | http://www.genome.jp/dbget-bin/www_bget?ko:K12972 | path:ko00260;path:ko00620;path:ko00630;path:ko01100;path:ko01120                                                                  |
| orf1707 | K12373 | HEXA_B                | http://www.genome.jp/dbget-bin/www_bget?ko:K12373 | path:ko00511;path:ko00520;path:ko00531;path:ko00603;path:ko00604;path:ko01100;path:ko01110;path:ko04142                           |
| orf1709 | K00573 | E2.1.1.77, pcm        | http://www.genome.jp/dbget-bin/www_bget?ko:K00573 |                                                                                                                                   |
| orf1711 | K12340 | tolC                  | http://www.genome.jp/dbget-bin/www_bget?ko:K12340 | path:ko00312;path:ko03070;path:ko04626;path:ko05133                                                                               |
| orf1712 | K01873 | VARS, valS            | http://www.genome.jp/dbget-bin/www_bget?ko:K01873 | path:ko00970                                                                                                                      |
| orf1713 | K07304 | msrA                  | http://www.genome.jp/dbget-bin/www_bget?ko:K07304 |                                                                                                                                   |
| orf1714 | K02049 | ABC.SN.A              | http://www.genome.jp/dbget-bin/www_bget?ko:K02049 |                                                                                                                                   |
| orf1715 | K02050 | ABC.SN.P              | http://www.genome.jp/dbget-bin/www_bget?ko:K02050 |                                                                                                                                   |
| orf1716 | K01520 | dut, DUT              | http://www.genome.jp/dbget-bin/www_bget?ko:K01520 | path:ko00240;path:ko01100                                                                                                         |
| orf1717 | K13038 | coaBC, dfp            | http://www.genome.jp/dbget-bin/www_bget?ko:K13038 | path:ko00770;path:ko01100                                                                                                         |
| orf1718 | K03183 | ubiE                  | http://www.genome.jp/dbget-bin/www_bget?ko:K03183 | path:ko00130;path:ko01100;path:ko01110                                                                                            |
| orf1719 | K10563 | mutM, fpg             | http://www.genome.jp/dbget-bin/www_bget?ko:K10563 | path:ko03410                                                                                                                      |
| orf1720 | K02968 | RP-S20, rpsT          | http://www.genome.jp/dbget-bin/www_bget?ko:K02968 | path:ko03010                                                                                                                      |
| orf1721 | K02313 | dnaA                  | http://www.genome.jp/dbget-bin/www_bget?ko:K02313 | path:ko02020;path:ko04112                                                                                                         |
| orf1722 | K02338 | DPO3B, dnaN           | http://www.genome.jp/dbget-bin/www_bget?ko:K02338 | path:ko00230;path:ko00240;path:ko01100;path:ko03030;path:ko03430;path:ko03440                                                     |
| orf1723 | K03629 | recF                  | http://www.genome.jp/dbget-bin/www_bget?ko:K03629 | path:ko03440                                                                                                                      |
| orf1724 | K02470 | gyrB                  | http://www.genome.jp/dbget-bin/www_bget?ko:K02470 |                                                                                                                                   |
| orf1725 | K04042 | glmU                  | http://www.genome.jp/dbget-bin/www_bget?ko:K04042 | path:ko00520;path:ko01100;path:ko01110                                                                                            |
| orf1726 | K01091 | E3.1.3.18, gph        | http://www.genome.jp/dbget-bin/www_bget?ko:K01091 | path:ko00630;path:ko01100;path:ko01110                                                                                            |

|         |        |                        |                                                   |                                                                                                         |
|---------|--------|------------------------|---------------------------------------------------|---------------------------------------------------------------------------------------------------------|
| orf1727 | K00820 | E2.6.1.16, glmS        | http://www.genome.jp/dbget-bin/www_bget?ko:K00820 | path:ko00250;path:ko00520;path:ko01100;path:ko01110                                                     |
| orf1728 | K03153 | thiO                   | http://www.genome.jp/dbget-bin/www_bget?ko:K03153 | path:ko00730;path:ko01100                                                                               |
| orf1729 | K03154 | thiS                   | http://www.genome.jp/dbget-bin/www_bget?ko:K03154 | path:ko04122                                                                                            |
| orf1730 | K03149 | thiG                   | http://www.genome.jp/dbget-bin/www_bget?ko:K03149 | path:ko00730;path:ko01100                                                                               |
| orf1731 | K00788 | thiE                   | http://www.genome.jp/dbget-bin/www_bget?ko:K00788 | path:ko00730;path:ko01100                                                                               |
| orf1732 | K03316 | TC.CPA1                | http://www.genome.jp/dbget-bin/www_bget?ko:K03316 |                                                                                                         |
| orf1735 | K01586 | lysA                   | http://www.genome.jp/dbget-bin/www_bget?ko:K01586 | path:ko00300;path:ko01100;path:ko01110;path:ko01120;path:ko01230                                        |
| orf1736 | K01489 | cdd, CDA               | http://www.genome.jp/dbget-bin/www_bget?ko:K01489 | path:ko00240;path:ko00983;path:ko01100                                                                  |
| orf1738 | K01755 | argH, ASL              | http://www.genome.jp/dbget-bin/www_bget?ko:K01755 | path:ko00250;path:ko00330;path:ko01100;path:ko01110;path:ko01230                                        |
| orf1740 | K00014 | aroE                   | http://www.genome.jp/dbget-bin/www_bget?ko:K00014 | path:ko00400;path:ko01100;path:ko01110;path:ko01230                                                     |
| orf1741 | K00859 | coaE                   | http://www.genome.jp/dbget-bin/www_bget?ko:K00859 | path:ko00770;path:ko01100                                                                               |
| orf1742 | K02342 | DPO3E, dnaQ            | http://www.genome.jp/dbget-bin/www_bget?ko:K02342 | path:ko00230;path:ko00240;path:ko01100;path:ko03030;path:ko03430;path:ko03440                           |
| orf1744 | K02066 | ABC.X1.P               | http://www.genome.jp/dbget-bin/www_bget?ko:K02066 | path:ko02010                                                                                            |
| orf1745 | K02065 | ABC.X1.A               | http://www.genome.jp/dbget-bin/www_bget?ko:K02065 | path:ko02010                                                                                            |
| orf1746 | K02067 | ABC.X1.S               | http://www.genome.jp/dbget-bin/www_bget?ko:K02067 | path:ko02010                                                                                            |
| orf1748 | K03321 | TC.SULP                | http://www.genome.jp/dbget-bin/www_bget?ko:K03321 |                                                                                                         |
| orf1749 | K01737 | queD, ptpS, PTS        | http://www.genome.jp/dbget-bin/www_bget?ko:K01737 | path:ko00790;path:ko01100                                                                               |
| orf1750 | K06920 | queC                   | http://www.genome.jp/dbget-bin/www_bget?ko:K06920 | path:ko00790;path:ko01100                                                                               |
| orf1752 | K01012 | bioB                   | http://www.genome.jp/dbget-bin/www_bget?ko:K01012 | path:ko00780;path:ko01100                                                                               |
| orf1753 | K01012 | bioB                   | http://www.genome.jp/dbget-bin/www_bget?ko:K01012 | path:ko00780;path:ko01100                                                                               |
| orf1754 | K01902 | sucD                   | http://www.genome.jp/dbget-bin/www_bget?ko:K01902 | path:ko00020;path:ko00640;path:ko00660;path:ko00720;path:ko01100;path:ko01110;path:ko01120;path:ko01200 |
| orf1755 | K01903 | sucC                   | http://www.genome.jp/dbget-bin/www_bget?ko:K01903 | path:ko00020;path:ko00640;path:ko00660;path:ko00720;path:ko01100;path:ko01110;path:ko01120;path:ko01200 |
| orf1758 | K02002 | proX                   | http://www.genome.jp/dbget-bin/www_bget?ko:K02002 | path:ko02010                                                                                            |
| orf1761 | K00645 | fabD                   | http://www.genome.jp/dbget-bin/www_bget?ko:K00645 | path:ko00061;path:ko01100;path:ko01212                                                                  |
| orf1762 | K00059 | fabG                   | http://www.genome.jp/dbget-bin/www_bget?ko:K00059 | path:ko00061;path:ko00780;path:ko01040;path:ko01100;path:ko01212                                        |
| orf1763 | K02078 | acpP                   | http://www.genome.jp/dbget-bin/www_bget?ko:K02078 |                                                                                                         |
| orf1764 | K09458 | fabF                   | http://www.genome.jp/dbget-bin/www_bget?ko:K09458 | path:ko00061;path:ko00780;path:ko01100;path:ko01212                                                     |
| orf1765 | K07082 | K07082                 | http://www.genome.jp/dbget-bin/www_bget?ko:K07082 |                                                                                                         |
| orf1767 | K01092 | E3.1.3.25, IMPA, suhB  | http://www.genome.jp/dbget-bin/www_bget?ko:K01092 | path:ko00521;path:ko00562;path:ko01100;path:ko01110;path:ko04070                                        |
| orf1771 | K11720 | lptG                   | http://www.genome.jp/dbget-bin/www_bget?ko:K11720 | path:ko02010                                                                                            |
| orf1772 | K07091 | lptF                   | http://www.genome.jp/dbget-bin/www_bget?ko:K07091 | path:ko02010                                                                                            |
| orf1776 | K00652 | bioF                   | http://www.genome.jp/dbget-bin/www_bget?ko:K00652 | path:ko00780;path:ko01100                                                                               |
| orf1778 | K00666 | K00666                 | http://www.genome.jp/dbget-bin/www_bget?ko:K00666 |                                                                                                         |
| orf1784 | K01238 | E3.2.1.-               | http://www.genome.jp/dbget-bin/www_bget?ko:K01238 |                                                                                                         |
| orf1791 | K03205 | virD4, lvhD4           | http://www.genome.jp/dbget-bin/www_bget?ko:K03205 | path:ko03070                                                                                            |
| orf1793 | K03196 | virB11, lvhB11         | http://www.genome.jp/dbget-bin/www_bget?ko:K03196 | path:ko03070;path:ko05120                                                                               |
| orf1794 | K03197 | virB2, lvhB2           | http://www.genome.jp/dbget-bin/www_bget?ko:K03197 | path:ko03070;path:ko05134                                                                               |
| orf1795 | K03198 | virB3, lvhB3           | http://www.genome.jp/dbget-bin/www_bget?ko:K03198 | path:ko03070                                                                                            |
| orf1796 | K03199 | virB4, lvhB4           | http://www.genome.jp/dbget-bin/www_bget?ko:K03199 | path:ko03070                                                                                            |
| orf1798 | K07344 | trbL                   | http://www.genome.jp/dbget-bin/www_bget?ko:K07344 |                                                                                                         |
| orf1799 | K03200 | virB5, lvhB5           | http://www.genome.jp/dbget-bin/www_bget?ko:K03200 | path:ko03070                                                                                            |
| orf1800 | K03204 | virB9, lvhB9           | http://www.genome.jp/dbget-bin/www_bget?ko:K03204 | path:ko03070                                                                                            |
| orf1801 | K03195 | virB10, lvhB10         | http://www.genome.jp/dbget-bin/www_bget?ko:K03195 | path:ko03070                                                                                            |
| orf1802 | K00154 | E1.2.1.68              | http://www.genome.jp/dbget-bin/www_bget?ko:K00154 |                                                                                                         |
| orf1807 | K01118 | acpD, azoR             | http://www.genome.jp/dbget-bin/www_bget?ko:K01118 |                                                                                                         |
| orf1817 | K02034 | ABC.PE.P1              | http://www.genome.jp/dbget-bin/www_bget?ko:K02034 |                                                                                                         |
| orf1818 | K02033 | ABC.PE.P               | http://www.genome.jp/dbget-bin/www_bget?ko:K02033 |                                                                                                         |
| orf1819 | K02031 | ABC.PE.A               | http://www.genome.jp/dbget-bin/www_bget?ko:K02031 |                                                                                                         |
| orf1826 | K03453 | TC.BASS                | http://www.genome.jp/dbget-bin/www_bget?ko:K03453 |                                                                                                         |
| orf1829 | K07221 | oprO_P                 | http://www.genome.jp/dbget-bin/www_bget?ko:K07221 |                                                                                                         |
| orf1834 | K03543 | emrA                   | http://www.genome.jp/dbget-bin/www_bget?ko:K03543 |                                                                                                         |
| orf1835 | K03446 | emrB                   | http://www.genome.jp/dbget-bin/www_bget?ko:K03446 |                                                                                                         |
| orf1838 | K00135 | gabD                   | http://www.genome.jp/dbget-bin/www_bget?ko:K00135 | path:ko00250;path:ko00310;path:ko00350;path:ko00650;path:ko01100;path:ko01120                           |
| orf1839 | K03387 | ahpF                   | http://www.genome.jp/dbget-bin/www_bget?ko:K03387 |                                                                                                         |
| orf1840 | K03386 | E1.11.1.15, PRDX, ahpC | http://www.genome.jp/dbget-bin/www_bget?ko:K03386 |                                                                                                         |
| orf1841 | K04761 | oxyR                   | http://www.genome.jp/dbget-bin/www_bget?ko:K04761 |                                                                                                         |

|         |        |                     |                                                   |                                                                                            |
|---------|--------|---------------------|---------------------------------------------------|--------------------------------------------------------------------------------------------|
| orf1846 | K00100 | E1.1.1.-            | http://www.genome.jp/dbget-bin/www_bget?ko:K00100 | path:ko00051;path:ko00363;path:ko00591;path:ko00625;path:ko00650;path:ko01100;path:ko01120 |
| orf1850 | K03322 | mntH                | http://www.genome.jp/dbget-bin/www_bget?ko:K03322 |                                                                                            |
| orf1859 | K06044 | treY, glgY          | http://www.genome.jp/dbget-bin/www_bget?ko:K06044 | path:ko00500;path:ko01100;path:ko01110                                                     |
| orf1860 | K00705 | malQ                | http://www.genome.jp/dbget-bin/www_bget?ko:K00705 | path:ko00500;path:ko01100                                                                  |
| orf1861 | K01236 | treZ, glgZ          | http://www.genome.jp/dbget-bin/www_bget?ko:K01236 | path:ko00500;path:ko01100;path:ko01110                                                     |
| orf1862 | K02438 | treX, glgX          | http://www.genome.jp/dbget-bin/www_bget?ko:K02438 | path:ko00500;path:ko01100;path:ko01110                                                     |
| orf1863 | K00700 | glgB                | http://www.genome.jp/dbget-bin/www_bget?ko:K00700 | path:ko00500;path:ko01100;path:ko01110                                                     |
| orf1864 | K00703 | E2.4.1.21, glgA     | http://www.genome.jp/dbget-bin/www_bget?ko:K00703 | path:ko00500;path:ko01100;path:ko01110                                                     |
| orf1865 | K00688 | E2.4.1.1, glgP, PYG | http://www.genome.jp/dbget-bin/www_bget?ko:K00688 | path:ko00500;path:ko01100;path:ko01110;path:ko04910                                        |
| orf1868 | K08995 | K08995              | http://www.genome.jp/dbget-bin/www_bget?ko:K08995 |                                                                                            |
| orf1877 | K01521 | cdh                 | http://www.genome.jp/dbget-bin/www_bget?ko:K01521 | path:ko00564                                                                               |
| orf1878 | K03305 | TC.POT              | http://www.genome.jp/dbget-bin/www_bget?ko:K03305 |                                                                                            |
| orf1879 | K06978 | K06978              | http://www.genome.jp/dbget-bin/www_bget?ko:K06978 |                                                                                            |
| orf1880 | K04046 | yegD                | http://www.genome.jp/dbget-bin/www_bget?ko:K04046 |                                                                                            |
| orf1883 | K07090 | K07090              | http://www.genome.jp/dbget-bin/www_bget?ko:K07090 |                                                                                            |
| orf1889 | K02013 | ABC.FEV.A           | http://www.genome.jp/dbget-bin/www_bget?ko:K02013 | path:ko02010                                                                               |
| orf1890 | K02015 | ABC.FEV.P           | http://www.genome.jp/dbget-bin/www_bget?ko:K02015 | path:ko02010                                                                               |
| orf1891 | K02016 | ABC.FEV.S           | http://www.genome.jp/dbget-bin/www_bget?ko:K02016 | path:ko02010                                                                               |
| orf1892 | K07230 | K07230              | http://www.genome.jp/dbget-bin/www_bget?ko:K07230 |                                                                                            |
| orf1896 | K01153 | hsdR                | http://www.genome.jp/dbget-bin/www_bget?ko:K01153 |                                                                                            |
| orf1898 | K01154 | hsdS                | http://www.genome.jp/dbget-bin/www_bget?ko:K01154 |                                                                                            |
| orf1899 | K03427 | hsdM                | http://www.genome.jp/dbget-bin/www_bget?ko:K03427 |                                                                                            |
| orf1900 | K07341 | doc                 | http://www.genome.jp/dbget-bin/www_bget?ko:K07341 |                                                                                            |
| orf1906 | K07462 | recJ                | http://www.genome.jp/dbget-bin/www_bget?ko:K07462 | path:ko03410;path:ko03430;path:ko03440                                                     |
| orf1907 | K00003 | E1.1.1.3            | http://www.genome.jp/dbget-bin/www_bget?ko:K00003 | path:ko00260;path:ko00270;path:ko00300;path:ko01100;path:ko01110;path:ko01120;path:ko01230 |
| orf1908 | K14261 | alaC                | http://www.genome.jp/dbget-bin/www_bget?ko:K14261 |                                                                                            |
| orf1911 | K01358 | clpP, CLPP          | http://www.genome.jp/dbget-bin/www_bget?ko:K01358 | path:ko04112                                                                               |
| orf1915 | K12262 | cybB                | http://www.genome.jp/dbget-bin/www_bget?ko:K12262 |                                                                                            |
| orf1920 | K01465 | URA4, pyrC          | http://www.genome.jp/dbget-bin/www_bget?ko:K01465 | path:ko00240;path:ko01100                                                                  |
| orf1921 | K09862 | K09862              | http://www.genome.jp/dbget-bin/www_bget?ko:K09862 |                                                                                            |
| orf1922 | K01128 | E3.1.4.-            | http://www.genome.jp/dbget-bin/www_bget?ko:K01128 |                                                                                            |
| orf1923 | K06287 | maf                 | http://www.genome.jp/dbget-bin/www_bget?ko:K06287 |                                                                                            |
| orf1924 | K02518 | infA                | http://www.genome.jp/dbget-bin/www_bget?ko:K02518 |                                                                                            |
| orf1925 | K00013 | hisD                | http://www.genome.jp/dbget-bin/www_bget?ko:K00013 | path:ko00340;path:ko01100;path:ko01110;path:ko01230                                        |
| orf1926 | K00765 | hisG                | http://www.genome.jp/dbget-bin/www_bget?ko:K00765 | path:ko00340;path:ko01100;path:ko01110;path:ko01230                                        |
| orf1927 | K00790 | murA                | http://www.genome.jp/dbget-bin/www_bget?ko:K00790 | path:ko00520;path:ko00550;path:ko01100                                                     |
| orf1928 | K01494 | E3.5.4.13, dcd      | http://www.genome.jp/dbget-bin/www_bget?ko:K01494 | path:ko00240;path:ko01100                                                                  |
| orf1936 | K01868 | TARS, thrS          | http://www.genome.jp/dbget-bin/www_bget?ko:K01868 | path:ko00970                                                                               |
| orf1938 | K02520 | infC, MTIF3         | http://www.genome.jp/dbget-bin/www_bget?ko:K02520 |                                                                                            |
| orf1943 | K02483 | K02483              | http://www.genome.jp/dbget-bin/www_bget?ko:K02483 |                                                                                            |
| orf1945 | K03579 | hrpB                | http://www.genome.jp/dbget-bin/www_bget?ko:K03579 |                                                                                            |
| orf1946 | K04084 | dsbD                | http://www.genome.jp/dbget-bin/www_bget?ko:K04084 |                                                                                            |
| orf1948 | K04083 | hslO                | http://www.genome.jp/dbget-bin/www_bget?ko:K04083 |                                                                                            |
| orf1951 | K00821 | argD                | http://www.genome.jp/dbget-bin/www_bget?ko:K00821 | path:ko00300;path:ko00330;path:ko01100;path:ko01110;path:ko01120;path:ko01210;path:ko01230 |
| orf1952 | K03565 | recX                | http://www.genome.jp/dbget-bin/www_bget?ko:K03565 |                                                                                            |
| orf1954 | K03116 | tatA                | http://www.genome.jp/dbget-bin/www_bget?ko:K03116 | path:ko03060;path:ko03070                                                                  |
| orf1955 | K08964 | mtnB                | http://www.genome.jp/dbget-bin/www_bget?ko:K08964 | path:ko00270;path:ko01100                                                                  |
| orf1956 | K08967 | mtnD, mtnZ, ADI1    | http://www.genome.jp/dbget-bin/www_bget?ko:K08967 | path:ko00270;path:ko01100                                                                  |
| orf1957 | K09880 | mtnC, ENOPH1        | http://www.genome.jp/dbget-bin/www_bget?ko:K09880 | path:ko00270;path:ko01100                                                                  |
| orf1958 | K11753 | ribF                | http://www.genome.jp/dbget-bin/www_bget?ko:K11753 | path:ko00740;path:ko01100                                                                  |
| orf1959 | K01870 | IARS, ileS          | http://www.genome.jp/dbget-bin/www_bget?ko:K01870 | path:ko00970                                                                               |
| orf1960 | K03101 | lspA                | http://www.genome.jp/dbget-bin/www_bget?ko:K03101 | path:ko03060                                                                               |
| orf1962 | K03572 | mutL                | http://www.genome.jp/dbget-bin/www_bget?ko:K03572 | path:ko03430                                                                               |
| orf1963 | K00342 | nuoM                | http://www.genome.jp/dbget-bin/www_bget?ko:K00342 | path:ko00190;path:ko01100                                                                  |
| orf1964 | K02622 | parE                | http://www.genome.jp/dbget-bin/www_bget?ko:K02622 |                                                                                            |
| orf1969 | K01738 | cysK                | http://www.genome.jp/dbget-bin/www_bget?ko:K01738 | path:ko00270;path:ko00920;path:ko01100;path:ko01120;path:ko01200;path:ko01230              |

|         |        |                             |                                                   |                                                                                                         |
|---------|--------|-----------------------------|---------------------------------------------------|---------------------------------------------------------------------------------------------------------|
| orf1973 | K03797 | E3.4.21.102, prc, ctpA      | http://www.genome.jp/dbget-bin/www_bget?ko:K03797 |                                                                                                         |
| orf1974 | K12573 | rnr, vacB                   | http://www.genome.jp/dbget-bin/www_bget?ko:K12573 | path:ko03018                                                                                            |
| orf1975 | K12573 | rnr, vacB                   | http://www.genome.jp/dbget-bin/www_bget?ko:K12573 | path:ko03018                                                                                            |
| orf1976 | K03168 | topA                        | http://www.genome.jp/dbget-bin/www_bget?ko:K03168 |                                                                                                         |
| orf1977 | K04096 | smf                         | http://www.genome.jp/dbget-bin/www_bget?ko:K04096 |                                                                                                         |
| orf1978 | K08591 | plsY                        | http://www.genome.jp/dbget-bin/www_bget?ko:K08591 | path:ko00561;path:ko00564;path:ko01100                                                                  |
| orf1979 | K01465 | URA4, pyrC                  | http://www.genome.jp/dbget-bin/www_bget?ko:K01465 | path:ko00240;path:ko01100                                                                               |
| orf1980 | K00609 | pyrB, PYR2                  | http://www.genome.jp/dbget-bin/www_bget?ko:K00609 | path:ko00240;path:ko00250;path:ko01100                                                                  |
| orf1981 | K01885 | EARS, gltX                  | http://www.genome.jp/dbget-bin/www_bget?ko:K01885 | path:ko00860;path:ko00970;path:ko01100;path:ko01110                                                     |
| orf1982 | K02238 | comEC                       | http://www.genome.jp/dbget-bin/www_bget?ko:K02238 |                                                                                                         |
| orf1983 | K10773 | NTH                         | http://www.genome.jp/dbget-bin/www_bget?ko:K10773 | path:ko03410                                                                                            |
| orf1984 | K10773 | NTH                         | http://www.genome.jp/dbget-bin/www_bget?ko:K10773 | path:ko03410                                                                                            |
| orf1985 | K06147 | ABCB-BAC                    | http://www.genome.jp/dbget-bin/www_bget?ko:K06147 |                                                                                                         |
| orf1987 | K01523 | hisE                        | http://www.genome.jp/dbget-bin/www_bget?ko:K01523 | path:ko00340;path:ko01100;path:ko01110;path:ko01230                                                     |
| orf1988 | K02500 | hisF                        | http://www.genome.jp/dbget-bin/www_bget?ko:K02500 | path:ko00340;path:ko01100;path:ko01110;path:ko01230                                                     |
| orf1989 | K01814 | hisA                        | http://www.genome.jp/dbget-bin/www_bget?ko:K01814 | path:ko00340;path:ko01100;path:ko01110;path:ko01230                                                     |
| orf1990 | K02501 | hisH                        | http://www.genome.jp/dbget-bin/www_bget?ko:K02501 | path:ko00340;path:ko01100;path:ko01110;path:ko01230                                                     |
| orf1992 | K01693 | E4.2.1.19, hisB             | http://www.genome.jp/dbget-bin/www_bget?ko:K01693 | path:ko00340;path:ko01100;path:ko01110;path:ko01230                                                     |
| orf1997 | K03699 | tlyC                        | http://www.genome.jp/dbget-bin/www_bget?ko:K03699 |                                                                                                         |
| orf1999 | K02334 | dpo                         | http://www.genome.jp/dbget-bin/www_bget?ko:K02334 |                                                                                                         |
| orf2001 | K00919 | ispE                        | http://www.genome.jp/dbget-bin/www_bget?ko:K00919 | path:ko00900;path:ko01100;path:ko01110                                                                  |
| orf2005 | K00936 | E2.7.3.-                    | http://www.genome.jp/dbget-bin/www_bget?ko:K00936 |                                                                                                         |
| orf2006 | K02483 | K02483                      | http://www.genome.jp/dbget-bin/www_bget?ko:K02483 |                                                                                                         |
| orf2007 | K01738 | cysK                        | http://www.genome.jp/dbget-bin/www_bget?ko:K01738 | path:ko00270;path:ko00920;path:ko01100;path:ko01120;path:ko01200;path:ko01230                           |
| orf2011 | K03316 | TC.CPA1                     | http://www.genome.jp/dbget-bin/www_bget?ko:K03316 |                                                                                                         |
| orf2015 | K01575 | E4.1.1.5, alsD              | http://www.genome.jp/dbget-bin/www_bget?ko:K01575 | path:ko00650;path:ko00660                                                                               |
| orf2016 | K01652 | E2.2.1.6L, ilvB, ilvG, ilvI | http://www.genome.jp/dbget-bin/www_bget?ko:K01652 | path:ko00290;path:ko00650;path:ko00660;path:ko00770;path:ko01100;path:ko01110;path:ko01210;path:ko01230 |
| orf2018 | K03777 | dld                         | http://www.genome.jp/dbget-bin/www_bget?ko:K03777 | path:ko00620;path:ko01120                                                                               |
| orf2019 | K04103 | E4.1.1.74, ipdC             | http://www.genome.jp/dbget-bin/www_bget?ko:K04103 | path:ko00380;path:ko01100                                                                               |
| orf2023 | K07267 | oprB                        | http://www.genome.jp/dbget-bin/www_bget?ko:K07267 |                                                                                                         |
| orf2025 | K03638 | moaB                        | http://www.genome.jp/dbget-bin/www_bget?ko:K03638 |                                                                                                         |
| orf2026 | K05520 | pfpI                        | http://www.genome.jp/dbget-bin/www_bget?ko:K05520 |                                                                                                         |
| orf2027 | K01495 | GCH1, folE                  | http://www.genome.jp/dbget-bin/www_bget?ko:K01495 | path:ko00790;path:ko01100                                                                               |
| orf2028 | K06195 | apaG                        | http://www.genome.jp/dbget-bin/www_bget?ko:K06195 |                                                                                                         |
| orf2029 | K10764 | metZ                        | http://www.genome.jp/dbget-bin/www_bget?ko:K10764 | path:ko00270;path:ko00920;path:ko01100                                                                  |
| orf2031 | K09857 | K09857                      | http://www.genome.jp/dbget-bin/www_bget?ko:K09857 |                                                                                                         |
| orf2032 | K06192 | pqiB                        | http://www.genome.jp/dbget-bin/www_bget?ko:K06192 |                                                                                                         |
| orf2033 | K02065 | ABC.X1.A                    | http://www.genome.jp/dbget-bin/www_bget?ko:K02065 | path:ko02010                                                                                            |
| orf2034 | K02066 | ABC.X1.P                    | http://www.genome.jp/dbget-bin/www_bget?ko:K02066 | path:ko02010                                                                                            |
| orf2039 | K00620 | argJ                        | http://www.genome.jp/dbget-bin/www_bget?ko:K00620 | path:ko00330;path:ko01100;path:ko01110;path:ko01210;path:ko01230                                        |
| orf2040 | K03769 | ppiC                        | http://www.genome.jp/dbget-bin/www_bget?ko:K03769 |                                                                                                         |
| orf2042 | K03070 | secA                        | http://www.genome.jp/dbget-bin/www_bget?ko:K03070 | path:ko03060;path:ko03070                                                                               |
| orf2044 | K01159 | ruvC                        | http://www.genome.jp/dbget-bin/www_bget?ko:K01159 | path:ko03440                                                                                            |
| orf2045 | K03550 | ruvA                        | http://www.genome.jp/dbget-bin/www_bget?ko:K03550 | path:ko03440                                                                                            |
| orf2046 | K03551 | ruvB                        | http://www.genome.jp/dbget-bin/www_bget?ko:K03551 | path:ko03440                                                                                            |
| orf2047 | K07107 | ybgC                        | http://www.genome.jp/dbget-bin/www_bget?ko:K07107 |                                                                                                         |
| orf2048 | K03562 | tolQ                        | http://www.genome.jp/dbget-bin/www_bget?ko:K03562 | path:ko01120                                                                                            |
| orf2049 | K03560 | tolR                        | http://www.genome.jp/dbget-bin/www_bget?ko:K03560 |                                                                                                         |
| orf2051 | K03641 | tolB                        | http://www.genome.jp/dbget-bin/www_bget?ko:K03641 |                                                                                                         |
| orf2052 | K03640 | pal                         | http://www.genome.jp/dbget-bin/www_bget?ko:K03640 |                                                                                                         |
| orf2054 | K04075 | tilS, mesJ                  | http://www.genome.jp/dbget-bin/www_bget?ko:K04075 |                                                                                                         |
| orf2055 | K03798 | ftsH, hflB                  | http://www.genome.jp/dbget-bin/www_bget?ko:K03798 |                                                                                                         |
| orf2057 | K00796 | folP                        | http://www.genome.jp/dbget-bin/www_bget?ko:K00796 | path:ko00790;path:ko01100                                                                               |
| orf2058 | K03431 | glmM                        | http://www.genome.jp/dbget-bin/www_bget?ko:K03431 | path:ko00520;path:ko01100                                                                               |
| orf2059 | K00941 | thiD                        | http://www.genome.jp/dbget-bin/www_bget?ko:K00941 | path:ko00730;path:ko01100                                                                               |
| orf2061 | K13584 | ctrA                        | http://www.genome.jp/dbget-bin/www_bget?ko:K13584 | path:ko02020;path:ko04112                                                                               |

|         |        |                        |                                                   |                                                                                                                      |
|---------|--------|------------------------|---------------------------------------------------|----------------------------------------------------------------------------------------------------------------------|
| orf2066 | K02346 | DPO4, dinB             | http://www.genome.jp/dbget-bin/www_bget?ko:K02346 |                                                                                                                      |
| orf2070 | K17218 | sqr                    | http://www.genome.jp/dbget-bin/www_bget?ko:K17218 | path:ko00920                                                                                                         |
| orf2073 | K03386 | E1.11.1.15, PRDX, ahpC | http://www.genome.jp/dbget-bin/www_bget?ko:K03386 |                                                                                                                      |
| orf2074 | K01433 | purU                   | http://www.genome.jp/dbget-bin/www_bget?ko:K01433 | path:ko00630;path:ko00670                                                                                            |
| orf2075 | K11924 | mntR                   | http://www.genome.jp/dbget-bin/www_bget?ko:K11924 |                                                                                                                      |
| orf2076 | K09003 | K09003                 | http://www.genome.jp/dbget-bin/www_bget?ko:K09003 |                                                                                                                      |
| orf2077 | K06147 | ABCB-BAC               | http://www.genome.jp/dbget-bin/www_bget?ko:K06147 |                                                                                                                      |
| orf2080 | K08715 | IRPC                   | http://www.genome.jp/dbget-bin/www_bget?ko:K08715 |                                                                                                                      |
| orf2081 | K02342 | DPO3E, dnaQ            | http://www.genome.jp/dbget-bin/www_bget?ko:K02342 | path:ko00230;path:ko00240;path:ko01100;path:ko03030;path:ko03430;path:ko03440                                        |
| orf2084 | K07024 | K07024                 | http://www.genome.jp/dbget-bin/www_bget?ko:K07024 |                                                                                                                      |
| orf2085 | K00036 | G6PD, zwf              | http://www.genome.jp/dbget-bin/www_bget?ko:K00036 | path:ko00030;path:ko00480;path:ko01100;path:ko01110;path:ko01120;path:ko01200                                        |
| orf2086 | K00033 | PGD, gnd               | http://www.genome.jp/dbget-bin/www_bget?ko:K00033 | path:ko00030;path:ko00480;path:ko01100;path:ko01110;path:ko01120;path:ko01200                                        |
| orf2087 | K13810 | tal-pgi                | http://www.genome.jp/dbget-bin/www_bget?ko:K13810 | path:ko00010;path:ko00030;path:ko00500;path:ko00520;path:ko01100;path:ko01110;path:ko01120;path:ko01200;path:ko01230 |
| orf2088 | K00615 | E2.2.1.1, tktA, tktB   | http://www.genome.jp/dbget-bin/www_bget?ko:K00615 | path:ko00030;path:ko00710;path:ko01051;path:ko01100;path:ko01110;path:ko01120;path:ko01200;path:ko01230              |
| orf2092 | K00817 | hisC                   | http://www.genome.jp/dbget-bin/www_bget?ko:K00817 | path:ko00340;path:ko00350;path:ko00360;path:ko00400;path:ko00401;path:ko00960;path:ko01100;path:ko01110;path:ko01230 |
| orf2097 | K03669 | mdoH                   | http://www.genome.jp/dbget-bin/www_bget?ko:K03669 |                                                                                                                      |
| orf2098 | K03670 | mdoG                   | http://www.genome.jp/dbget-bin/www_bget?ko:K03670 |                                                                                                                      |
| orf2099 | K02019 | modE                   | http://www.genome.jp/dbget-bin/www_bget?ko:K02019 |                                                                                                                      |
| orf2102 | K00045 | E1.1.1.67, mtlK        | http://www.genome.jp/dbget-bin/www_bget?ko:K00045 | path:ko00051                                                                                                         |
| orf2106 | K03593 | mrp                    | http://www.genome.jp/dbget-bin/www_bget?ko:K03593 |                                                                                                                      |
| orf2107 | K05801 | djlA                   | http://www.genome.jp/dbget-bin/www_bget?ko:K05801 |                                                                                                                      |
| orf2110 | K00773 | tgt, QTRT1             | http://www.genome.jp/dbget-bin/www_bget?ko:K00773 |                                                                                                                      |
| orf2112 | K07568 | queA                   | http://www.genome.jp/dbget-bin/www_bget?ko:K07568 |                                                                                                                      |
| orf2113 | K06910 | K06910                 | http://www.genome.jp/dbget-bin/www_bget?ko:K06910 |                                                                                                                      |
| orf2115 | K01676 | E4.2.1.2A, fumA, fumB  | http://www.genome.jp/dbget-bin/www_bget?ko:K01676 | path:ko00020;path:ko00620;path:ko00720;path:ko01100;path:ko01110;path:ko01120;path:ko01200                           |
| orf2116 | K09985 | K09985                 | http://www.genome.jp/dbget-bin/www_bget?ko:K09985 |                                                                                                                      |
| orf2118 | K03465 | E2.1.1.148, thyX, thy1 | http://www.genome.jp/dbget-bin/www_bget?ko:K03465 | path:ko00240;path:ko00670;path:ko01100                                                                               |
| orf2119 | K04754 | vacJ                   | http://www.genome.jp/dbget-bin/www_bget?ko:K04754 |                                                                                                                      |
| orf2120 | K07323 | ttg2                   | http://www.genome.jp/dbget-bin/www_bget?ko:K07323 | path:ko02010                                                                                                         |
| orf2121 | K00680 | E2.3.1.-               | http://www.genome.jp/dbget-bin/www_bget?ko:K00680 | path:ko00350;path:ko00362;path:ko00627;path:ko00642;path:ko00903;path:ko01120                                        |
| orf2123 | K01507 | ppa                    | http://www.genome.jp/dbget-bin/www_bget?ko:K01507 | path:ko00190                                                                                                         |
| orf2127 | K07126 | K07126                 | http://www.genome.jp/dbget-bin/www_bget?ko:K07126 |                                                                                                                      |
| orf2128 | K02022 | ABC.MR.TX              | http://www.genome.jp/dbget-bin/www_bget?ko:K02022 |                                                                                                                      |
| orf2129 | K06147 | ABCB-BAC               | http://www.genome.jp/dbget-bin/www_bget?ko:K06147 |                                                                                                                      |
| orf2131 | K00548 | metH, MTR              | http://www.genome.jp/dbget-bin/www_bget?ko:K00548 | path:ko00270;path:ko00450;path:ko00670;path:ko01100;path:ko01110;path:ko01230                                        |
| orf2132 | K01523 | hisE                   | http://www.genome.jp/dbget-bin/www_bget?ko:K01523 | path:ko00340;path:ko01100;path:ko01110;path:ko01230                                                                  |
| orf2133 | K03558 | cvpA                   | http://www.genome.jp/dbget-bin/www_bget?ko:K03558 |                                                                                                                      |
| orf2134 | K00764 | purF, PPAT             | http://www.genome.jp/dbget-bin/www_bget?ko:K00764 | path:ko00230;path:ko00250;path:ko01100;path:ko01110                                                                  |
| orf2141 | K03601 | xseA                   | http://www.genome.jp/dbget-bin/www_bget?ko:K03601 | path:ko03430                                                                                                         |
| orf2142 | K01945 | purD                   | http://www.genome.jp/dbget-bin/www_bget?ko:K01945 | path:ko00230;path:ko01100;path:ko01110                                                                               |
| orf2143 | K08169 | yebQ                   | http://www.genome.jp/dbget-bin/www_bget?ko:K08169 |                                                                                                                      |
| orf2144 | K03458 | TC.NCS2                | http://www.genome.jp/dbget-bin/www_bget?ko:K03458 |                                                                                                                      |
| orf2146 | K03559 | exbD                   | http://www.genome.jp/dbget-bin/www_bget?ko:K03559 |                                                                                                                      |
| orf2147 | K03559 | exbD                   | http://www.genome.jp/dbget-bin/www_bget?ko:K03559 |                                                                                                                      |
| orf2148 | K03561 | exbB                   | http://www.genome.jp/dbget-bin/www_bget?ko:K03561 |                                                                                                                      |
| orf2149 | K03832 | tonB                   | http://www.genome.jp/dbget-bin/www_bget?ko:K03832 |                                                                                                                      |
| orf2153 | K01486 | ade                    | http://www.genome.jp/dbget-bin/www_bget?ko:K01486 | path:ko00230;path:ko01100                                                                                            |
| orf2154 | K03147 | thiC                   | http://www.genome.jp/dbget-bin/www_bget?ko:K03147 | path:ko00730;path:ko01100                                                                                            |
| orf2158 | K07266 | kpsC, lipA             | http://www.genome.jp/dbget-bin/www_bget?ko:K07266 |                                                                                                                      |
| orf2163 | K07265 | kpsS, lipB             | http://www.genome.jp/dbget-bin/www_bget?ko:K07265 |                                                                                                                      |
| orf2164 | K09689 | ABC-2.CPSE.A           | http://www.genome.jp/dbget-bin/www_bget?ko:K09689 | path:ko02010                                                                                                         |
| orf2165 | K10107 | ABC-2.CPSE.P1          | http://www.genome.jp/dbget-bin/www_bget?ko:K10107 | path:ko02010                                                                                                         |
| orf2167 | K01991 | ABC-2.OM, wza          | http://www.genome.jp/dbget-bin/www_bget?ko:K01991 |                                                                                                                      |
| orf2168 | K05838 | ybbN                   | http://www.genome.jp/dbget-bin/www_bget?ko:K05838 |                                                                                                                      |

|         |        |                        |                                                   |                                                                                                                                   |
|---------|--------|------------------------|---------------------------------------------------|-----------------------------------------------------------------------------------------------------------------------------------|
| orf2169 | K07157 | K07157                 | http://www.genome.jp/dbget-bin/www_bget?ko:K07157 |                                                                                                                                   |
| orf2170 | K09791 | K09791                 | http://www.genome.jp/dbget-bin/www_bget?ko:K09791 |                                                                                                                                   |
| orf2171 | K01918 | panC                   | http://www.genome.jp/dbget-bin/www_bget?ko:K01918 | path:ko00410;path:ko00770;path:ko01100;path:ko01110                                                                               |
| orf2173 | K02302 | cysG                   | http://www.genome.jp/dbget-bin/www_bget?ko:K02302 | path:ko00860;path:ko01100;path:ko01110                                                                                            |
| orf2185 | K08641 | vanX                   | http://www.genome.jp/dbget-bin/www_bget?ko:K08641 | path:ko02020                                                                                                                      |
| orf2191 | K03701 | uvrA                   | http://www.genome.jp/dbget-bin/www_bget?ko:K03701 | path:ko03420                                                                                                                      |
| orf2192 | K03299 | TC.GNTP                | http://www.genome.jp/dbget-bin/www_bget?ko:K03299 |                                                                                                                                   |
| orf2200 | K01785 | E5.1.3.3, galM         | http://www.genome.jp/dbget-bin/www_bget?ko:K01785 | path:ko00010;path:ko00052;path:ko01100;path:ko01110;path:ko01120                                                                  |
| orf2209 | K03297 | TC.SMR, emrE           | http://www.genome.jp/dbget-bin/www_bget?ko:K03297 |                                                                                                                                   |
| orf2215 | K00031 | IDH1, IDH2, icd        | http://www.genome.jp/dbget-bin/www_bget?ko:K00031 | path:ko00020;path:ko00480;path:ko00720;path:ko01100;path:ko01110;path:ko01120;path:ko01200;path:ko01210;path:ko01230;path:ko04146 |
| orf2218 | K13771 | nsrR                   | http://www.genome.jp/dbget-bin/www_bget?ko:K13771 | path:ko05132                                                                                                                      |
| orf2221 | K04719 | bluB                   | http://www.genome.jp/dbget-bin/www_bget?ko:K04719 | path:ko00740;path:ko01100                                                                                                         |
| orf2232 | K03218 | rlmB                   | http://www.genome.jp/dbget-bin/www_bget?ko:K03218 |                                                                                                                                   |
| orf2233 | K00114 | exaA                   | http://www.genome.jp/dbget-bin/www_bget?ko:K00114 | path:ko00010;path:ko00625;path:ko01100;path:ko01110;path:ko01120                                                                  |
| orf2235 | K06016 | E3.5.1.87              | http://www.genome.jp/dbget-bin/www_bget?ko:K06016 |                                                                                                                                   |
| orf2236 | K03307 | TC.SSS                 | http://www.genome.jp/dbget-bin/www_bget?ko:K03307 |                                                                                                                                   |
| orf2237 | K02433 | gatA, QRSL1            | http://www.genome.jp/dbget-bin/www_bget?ko:K02433 | path:ko00970;path:ko01100                                                                                                         |
| orf2243 | K07115 | rlmJ                   | http://www.genome.jp/dbget-bin/www_bget?ko:K07115 |                                                                                                                                   |
| orf2244 | K00852 | rbsK, RBKS             | http://www.genome.jp/dbget-bin/www_bget?ko:K00852 | path:ko00030                                                                                                                      |
| orf2249 | K01991 | ABC-2.OM, wza          | http://www.genome.jp/dbget-bin/www_bget?ko:K01991 |                                                                                                                                   |
| orf2251 | K01784 | galE, GALE             | http://www.genome.jp/dbget-bin/www_bget?ko:K01784 | path:ko00052;path:ko00520;path:ko01100;path:ko01110                                                                               |
| orf2253 | K16074 | zntB                   | http://www.genome.jp/dbget-bin/www_bget?ko:K16074 |                                                                                                                                   |
| orf2255 | K01251 | E3.3.1.1, ahcY         | http://www.genome.jp/dbget-bin/www_bget?ko:K01251 | path:ko00270;path:ko01100                                                                                                         |
| orf2256 | K01273 | E3.4.13.19, DPEP1      | http://www.genome.jp/dbget-bin/www_bget?ko:K01273 |                                                                                                                                   |
| orf2257 | K06221 | dkgA                   | http://www.genome.jp/dbget-bin/www_bget?ko:K06221 |                                                                                                                                   |
| orf2261 | K11069 | potD                   | http://www.genome.jp/dbget-bin/www_bget?ko:K11069 | path:ko02010                                                                                                                      |
| orf2262 | K00655 | plsC                   | http://www.genome.jp/dbget-bin/www_bget?ko:K00655 | path:ko00561;path:ko00564;path:ko01100                                                                                            |
| orf2266 | K01809 | E5.3.1.8, manA         | http://www.genome.jp/dbget-bin/www_bget?ko:K01809 | path:ko00051;path:ko00520;path:ko01100;path:ko01110                                                                               |
| orf2268 | K03272 | gmhC, hldE, waaE, rfaE | http://www.genome.jp/dbget-bin/www_bget?ko:K03272 | path:ko00540;path:ko01100                                                                                                         |
| orf2269 | K06204 | dksA                   | http://www.genome.jp/dbget-bin/www_bget?ko:K06204 |                                                                                                                                   |
| orf2274 | K03320 | amt, AMT, MEP          | http://www.genome.jp/dbget-bin/www_bget?ko:K03320 |                                                                                                                                   |
| orf2275 | K04752 | glnK                   | http://www.genome.jp/dbget-bin/www_bget?ko:K04752 |                                                                                                                                   |
| orf2281 | K00799 | GST, gst               | http://www.genome.jp/dbget-bin/www_bget?ko:K00799 | path:ko00480;path:ko00980;path:ko00982;path:ko05204                                                                               |
| orf2285 | K06075 | slyA                   | http://www.genome.jp/dbget-bin/www_bget?ko:K06075 |                                                                                                                                   |
| orf2286 | K03299 | TC.GNTP                | http://www.genome.jp/dbget-bin/www_bget?ko:K03299 |                                                                                                                                   |
| orf2288 | K03808 | pqiA                   | http://www.genome.jp/dbget-bin/www_bget?ko:K03808 |                                                                                                                                   |
| orf2289 | K06192 | pqiB                   | http://www.genome.jp/dbget-bin/www_bget?ko:K06192 |                                                                                                                                   |
| orf2290 | K09857 | K09857                 | http://www.genome.jp/dbget-bin/www_bget?ko:K09857 |                                                                                                                                   |
| orf2291 | K02601 | nusG                   | http://www.genome.jp/dbget-bin/www_bget?ko:K02601 |                                                                                                                                   |
| orf2292 | K03073 | secE                   | http://www.genome.jp/dbget-bin/www_bget?ko:K03073 | path:ko03060;path:ko03070                                                                                                         |
| orf2295 | K02113 | ATPF1D, atpH           | http://www.genome.jp/dbget-bin/www_bget?ko:K02113 | path:ko00190;path:ko00195;path:ko01100                                                                                            |
| orf2296 | K02111 | ATPF1A, atpA           | http://www.genome.jp/dbget-bin/www_bget?ko:K02111 | path:ko00190;path:ko00195;path:ko01100                                                                                            |
| orf2297 | K02115 | ATPF1G, atpG           | http://www.genome.jp/dbget-bin/www_bget?ko:K02115 | path:ko00190;path:ko00195;path:ko01100                                                                                            |
| orf2298 | K02112 | ATPF1B, atpD           | http://www.genome.jp/dbget-bin/www_bget?ko:K02112 | path:ko00190;path:ko00195;path:ko01100                                                                                            |
| orf2299 | K02114 | ATPF1E, atpC           | http://www.genome.jp/dbget-bin/www_bget?ko:K02114 | path:ko00190;path:ko00195;path:ko01100                                                                                            |
| orf2300 | K09457 | queF1, queF            | http://www.genome.jp/dbget-bin/www_bget?ko:K09457 | path:ko00790;path:ko01100                                                                                                         |
| orf2301 | K03684 | rnd                    | http://www.genome.jp/dbget-bin/www_bget?ko:K03684 |                                                                                                                                   |
| orf2302 | K13583 | gcrA                   | http://www.genome.jp/dbget-bin/www_bget?ko:K13583 | path:ko04112                                                                                                                      |
| orf2306 | K06207 | typA, bipA             | http://www.genome.jp/dbget-bin/www_bget?ko:K06207 |                                                                                                                                   |
| orf2308 | K00285 | dadA                   | http://www.genome.jp/dbget-bin/www_bget?ko:K00285 | path:ko00360                                                                                                                      |
| orf2309 | K00384 | E1.8.1.9, trxB         | http://www.genome.jp/dbget-bin/www_bget?ko:K00384 | path:ko00240;path:ko00450                                                                                                         |
| orf2310 | K06925 | tsaE                   | http://www.genome.jp/dbget-bin/www_bget?ko:K06925 |                                                                                                                                   |
| orf2311 | K00966 | GMPP                   | http://www.genome.jp/dbget-bin/www_bget?ko:K00966 | path:ko00051;path:ko00520;path:ko01100;path:ko01110                                                                               |
| orf2314 | K03671 | trxA                   | http://www.genome.jp/dbget-bin/www_bget?ko:K03671 |                                                                                                                                   |
| orf2317 | K00720 | UGCG                   | http://www.genome.jp/dbget-bin/www_bget?ko:K00720 | path:ko00600;path:ko01100                                                                                                         |

|         |        |                        |                                                   |                                                                                                                                                                                                    |
|---------|--------|------------------------|---------------------------------------------------|----------------------------------------------------------------------------------------------------------------------------------------------------------------------------------------------------|
| orf2320 | K11068 | hlyIII                 | http://www.genome.jp/dbget-bin/www_bget?ko:K11068 |                                                                                                                                                                                                    |
| orf2322 | K09384 | K09384                 | http://www.genome.jp/dbget-bin/www_bget?ko:K09384 |                                                                                                                                                                                                    |
| orf2327 | K01011 | TST, MPST, sseA        | http://www.genome.jp/dbget-bin/www_bget?ko:K01011 | path:ko00270;path:ko00920;path:ko01100;path:ko01120;path:ko04122                                                                                                                                   |
| orf2336 | K06153 | E3.6.1.27, bacA        | http://www.genome.jp/dbget-bin/www_bget?ko:K06153 | path:ko00550                                                                                                                                                                                       |
| orf2337 | K02067 | ABC.X1.S               | http://www.genome.jp/dbget-bin/www_bget?ko:K02067 | path:ko02010                                                                                                                                                                                       |
| orf2340 | K08305 | mltB                   | http://www.genome.jp/dbget-bin/www_bget?ko:K08305 |                                                                                                                                                                                                    |
| orf2341 | K07258 | dacC, dacA, dacD       | http://www.genome.jp/dbget-bin/www_bget?ko:K07258 | path:ko00550;path:ko01100                                                                                                                                                                          |
| orf2342 | K00943 | E2.7.4.9, tmk          | http://www.genome.jp/dbget-bin/www_bget?ko:K00943 | path:ko00240;path:ko01100                                                                                                                                                                          |
| orf2343 | K02341 | DPO3D2, holB           | http://www.genome.jp/dbget-bin/www_bget?ko:K02341 | path:ko00230;path:ko00240;path:ko01100;path:ko03030;path:ko03430;path:ko03440                                                                                                                      |
| orf2344 | K01874 | MARS, metG             | http://www.genome.jp/dbget-bin/www_bget?ko:K01874 | path:ko00450;path:ko00970                                                                                                                                                                          |
| orf2345 | K03424 | tatD                   | http://www.genome.jp/dbget-bin/www_bget?ko:K03424 |                                                                                                                                                                                                    |
| orf2346 | K06167 | phnP                   | http://www.genome.jp/dbget-bin/www_bget?ko:K06167 | path:ko00440                                                                                                                                                                                       |
| orf2347 | K00088 | guaB                   | http://www.genome.jp/dbget-bin/www_bget?ko:K00088 | path:ko00230;path:ko00983;path:ko01100;path:ko01110                                                                                                                                                |
| orf2348 | K03500 | rsmB, sun              | http://www.genome.jp/dbget-bin/www_bget?ko:K03500 |                                                                                                                                                                                                    |
| orf2353 | K01142 | E3.1.11.2, xthA        | http://www.genome.jp/dbget-bin/www_bget?ko:K01142 | path:ko03410                                                                                                                                                                                       |
| orf2354 | K03703 | uvrC                   | http://www.genome.jp/dbget-bin/www_bget?ko:K03703 | path:ko03420                                                                                                                                                                                       |
| orf2355 | K00995 | E2.7.8.5, pgsA, PGS1   | http://www.genome.jp/dbget-bin/www_bget?ko:K00995 | path:ko00564;path:ko01100                                                                                                                                                                          |
| orf2357 | K03636 | moaD                   | http://www.genome.jp/dbget-bin/www_bget?ko:K03636 | path:ko00790;path:ko01100;path:ko04122                                                                                                                                                             |
| orf2358 | K03635 | MOCS2, moaE            | http://www.genome.jp/dbget-bin/www_bget?ko:K03635 | path:ko00790;path:ko01100;path:ko04122                                                                                                                                                             |
| orf2359 | K00525 | E1.17.4.1A, nrdA, nrdE | http://www.genome.jp/dbget-bin/www_bget?ko:K00525 | path:ko00230;path:ko00240;path:ko01100                                                                                                                                                             |
| orf2360 | K00526 | E1.17.4.1B, nrdB, nrdF | http://www.genome.jp/dbget-bin/www_bget?ko:K00526 | path:ko00230;path:ko00240;path:ko01100                                                                                                                                                             |
| orf2362 | K02523 | ispB                   | http://www.genome.jp/dbget-bin/www_bget?ko:K02523 | path:ko00900;path:ko01110                                                                                                                                                                          |
| orf2363 | K01776 | E5.1.1.3, murI         | http://www.genome.jp/dbget-bin/www_bget?ko:K01776 | path:ko00471;path:ko01100                                                                                                                                                                          |
| orf2364 | K00762 | pyrE                   | http://www.genome.jp/dbget-bin/www_bget?ko:K00762 | path:ko00240;path:ko01100                                                                                                                                                                          |
| orf2366 | K01647 | CS, gltA               | http://www.genome.jp/dbget-bin/www_bget?ko:K01647 | path:ko00020;path:ko00630;path:ko01100;path:ko01110;path:ko01120;path:ko01200;path:ko01210;path:ko01230                                                                                            |
| orf2367 | K08296 | sixA                   | http://www.genome.jp/dbget-bin/www_bget?ko:K08296 |                                                                                                                                                                                                    |
| orf2368 | K01090 | E3.1.3.16              | http://www.genome.jp/dbget-bin/www_bget?ko:K01090 |                                                                                                                                                                                                    |
| orf2369 | K01067 | E3.1.2.1, ACH1         | http://www.genome.jp/dbget-bin/www_bget?ko:K01067 | path:ko00620                                                                                                                                                                                       |
| orf2371 | K03529 | smc                    | http://www.genome.jp/dbget-bin/www_bget?ko:K03529 |                                                                                                                                                                                                    |
| orf2374 | K07042 | ybeY, yqfG             | http://www.genome.jp/dbget-bin/www_bget?ko:K07042 |                                                                                                                                                                                                    |
| orf2375 | K06217 | phoH, phoL             | http://www.genome.jp/dbget-bin/www_bget?ko:K06217 |                                                                                                                                                                                                    |
| orf2376 | K06168 | miaB                   | http://www.genome.jp/dbget-bin/www_bget?ko:K06168 |                                                                                                                                                                                                    |
| orf2379 | K07278 | ytfM                   | http://www.genome.jp/dbget-bin/www_bget?ko:K07278 |                                                                                                                                                                                                    |
| orf2380 | K09800 | K09800                 | http://www.genome.jp/dbget-bin/www_bget?ko:K09800 |                                                                                                                                                                                                    |
| orf2383 | K07736 | K07736                 | http://www.genome.jp/dbget-bin/www_bget?ko:K07736 |                                                                                                                                                                                                    |
| orf2384 | K08994 | yneE                   | http://www.genome.jp/dbget-bin/www_bget?ko:K08994 |                                                                                                                                                                                                    |
| orf2385 | K00121 | frmA, ADH5, adhC       | http://www.genome.jp/dbget-bin/www_bget?ko:K00121 | path:ko00010;path:ko00071;path:ko00350;path:ko00625;path:ko00626;path:ko00680;path:ko00830;path:ko00980;path:ko00982;path:ko01100;path:ko01110;path:ko01120;path:ko01200;path:ko01220;path:ko05204 |
| orf2386 | K01070 | frmB, ESD, fghA        | http://www.genome.jp/dbget-bin/www_bget?ko:K01070 | path:ko00680;path:ko01120;path:ko01200                                                                                                                                                             |
| orf2388 | K01867 | WARS, trpS             | http://www.genome.jp/dbget-bin/www_bget?ko:K01867 | path:ko00970                                                                                                                                                                                       |
| orf2390 | K03773 | flkI                   | http://www.genome.jp/dbget-bin/www_bget?ko:K03773 |                                                                                                                                                                                                    |
| orf2391 | K01940 | E6.3.4.5, argG         | http://www.genome.jp/dbget-bin/www_bget?ko:K01940 | path:ko00250;path:ko00330;path:ko01100;path:ko01110;path:ko01230                                                                                                                                   |
| orf2392 | K06941 | rlmN                   | http://www.genome.jp/dbget-bin/www_bget?ko:K06941 |                                                                                                                                                                                                    |
| orf2393 | K06442 | tlyA                   | http://www.genome.jp/dbget-bin/www_bget?ko:K06442 |                                                                                                                                                                                                    |
| orf2394 | K09005 | K09005                 | http://www.genome.jp/dbget-bin/www_bget?ko:K09005 |                                                                                                                                                                                                    |
| orf2397 | K07402 | xdhC                   | http://www.genome.jp/dbget-bin/www_bget?ko:K07402 |                                                                                                                                                                                                    |
| orf2398 | K07141 | mocA                   | http://www.genome.jp/dbget-bin/www_bget?ko:K07141 |                                                                                                                                                                                                    |
| orf2401 | K00783 | rlmH                   | http://www.genome.jp/dbget-bin/www_bget?ko:K00783 |                                                                                                                                                                                                    |
| orf2402 | K09710 | ybeB                   | http://www.genome.jp/dbget-bin/www_bget?ko:K09710 |                                                                                                                                                                                                    |
| orf2403 | K00969 | nadD                   | http://www.genome.jp/dbget-bin/www_bget?ko:K00969 | path:ko00760;path:ko01100                                                                                                                                                                          |
| orf2404 | K00147 | proA                   | http://www.genome.jp/dbget-bin/www_bget?ko:K00147 | path:ko00330;path:ko01100;path:ko01230                                                                                                                                                             |
| orf2405 | K06942 | K06942                 | http://www.genome.jp/dbget-bin/www_bget?ko:K06942 |                                                                                                                                                                                                    |
| orf2406 | K01056 | PTH1, pth, spoVC       | http://www.genome.jp/dbget-bin/www_bget?ko:K01056 |                                                                                                                                                                                                    |
| orf2407 | K02897 | RP-L25, rplY           | http://www.genome.jp/dbget-bin/www_bget?ko:K02897 | path:ko03010                                                                                                                                                                                       |
| orf2408 | K15634 | gpmB                   | http://www.genome.jp/dbget-bin/www_bget?ko:K15634 | path:ko00010;path:ko00260;path:ko00680;path:ko01100;path:ko01110;path:ko01120;path:ko01200;path:ko01230                                                                                            |
| orf2409 | K00948 | PRPS, prsA             | http://www.genome.jp/dbget-bin/www_bget?ko:K00948 | path:ko00030;path:ko00230;path:ko01100;path:ko01110;path:ko01120;path:ko01200;path:ko01230                                                                                                         |

|         |        |                          |                                                   |                                                                                                                                                             |
|---------|--------|--------------------------|---------------------------------------------------|-------------------------------------------------------------------------------------------------------------------------------------------------------------|
| orf2411 | K05810 | yfiH                     | http://www.genome.jp/dbget-bin/www_bget?ko:K05810 |                                                                                                                                                             |
| orf2413 | K13292 | lgt, umpA                | http://www.genome.jp/dbget-bin/www_bget?ko:K13292 |                                                                                                                                                             |
| orf2414 | K03274 | gmhD, rfaD               | http://www.genome.jp/dbget-bin/www_bget?ko:K03274 | path:ko00540;path:ko01100                                                                                                                                   |
| orf2417 | K00286 | E1.5.1.2, proC           | http://www.genome.jp/dbget-bin/www_bget?ko:K00286 | path:ko00330;path:ko01100;path:ko01110;path:ko01230                                                                                                         |
| orf2428 | K00782 | ykgG                     | http://www.genome.jp/dbget-bin/www_bget?ko:K00782 |                                                                                                                                                             |
| orf2429 | K03530 | hupB                     | http://www.genome.jp/dbget-bin/www_bget?ko:K03530 |                                                                                                                                                             |
| orf2431 | K01950 | E6.3.5.1, NADSYN1, QNS1, | http://www.genome.jp/dbget-bin/www_bget?ko:K01950 | path:ko00760;path:ko01100                                                                                                                                   |
| orf2434 | K00697 | otsA                     | http://www.genome.jp/dbget-bin/www_bget?ko:K00697 | path:ko00500;path:ko01100                                                                                                                                   |
| orf2435 | K01087 | otsB                     | http://www.genome.jp/dbget-bin/www_bget?ko:K01087 | path:ko00500;path:ko01100                                                                                                                                   |
| orf2438 | K02067 | ABC.X1.S                 | http://www.genome.jp/dbget-bin/www_bget?ko:K02067 | path:ko02010                                                                                                                                                |
| orf2442 | K09919 | K09919                   | http://www.genome.jp/dbget-bin/www_bget?ko:K09919 |                                                                                                                                                             |
| orf2443 | K13953 | adhP                     | http://www.genome.jp/dbget-bin/www_bget?ko:K13953 | path:ko00010;path:ko00071;path:ko00350;path:ko00625;path:ko00626;path:ko00830;path:ko00980;path:ko00982;path:ko01100;path:ko01110;path:ko01120;path:ko01220 |
| orf2445 | K05592 | deaD                     | http://www.genome.jp/dbget-bin/www_bget?ko:K05592 | path:ko03018                                                                                                                                                |
| orf2450 | K03596 | lepA                     | http://www.genome.jp/dbget-bin/www_bget?ko:K03596 | path:ko05134                                                                                                                                                |
| orf2454 | K01238 | E3.2.1.-                 | http://www.genome.jp/dbget-bin/www_bget?ko:K01238 |                                                                                                                                                             |
| orf2455 | K09795 | K09795                   | http://www.genome.jp/dbget-bin/www_bget?ko:K09795 |                                                                                                                                                             |
| orf2457 | K03382 | atzB                     | http://www.genome.jp/dbget-bin/www_bget?ko:K03382 | path:ko00791;path:ko01100;path:ko01120                                                                                                                      |
| orf2460 | K07290 | yhjG                     | http://www.genome.jp/dbget-bin/www_bget?ko:K07290 |                                                                                                                                                             |
| orf2461 | K01687 | ilvD                     | http://www.genome.jp/dbget-bin/www_bget?ko:K01687 | path:ko00290;path:ko00770;path:ko01100;path:ko01110;path:ko01210;path:ko01230                                                                               |
| orf2479 | K03292 | TC.GPH                   | http://www.genome.jp/dbget-bin/www_bget?ko:K03292 |                                                                                                                                                             |
| orf2481 | K10253 | K10253                   | http://www.genome.jp/dbget-bin/www_bget?ko:K10253 |                                                                                                                                                             |
| orf2501 | K17677 | IRC3                     | http://www.genome.jp/dbget-bin/www_bget?ko:K17677 |                                                                                                                                                             |
| orf2503 | K06919 | K06919                   | http://www.genome.jp/dbget-bin/www_bget?ko:K06919 |                                                                                                                                                             |
| orf2508 | K06909 | xtmB                     | http://www.genome.jp/dbget-bin/www_bget?ko:K06909 |                                                                                                                                                             |
| orf2509 | K09961 | K09961                   | http://www.genome.jp/dbget-bin/www_bget?ko:K09961 |                                                                                                                                                             |
| orf2546 | K06919 | K06919                   | http://www.genome.jp/dbget-bin/www_bget?ko:K06919 |                                                                                                                                                             |
| orf2547 | K07047 | K07047                   | http://www.genome.jp/dbget-bin/www_bget?ko:K07047 |                                                                                                                                                             |
| orf2556 | K02014 | TC.FEV.OM                | http://www.genome.jp/dbget-bin/www_bget?ko:K02014 |                                                                                                                                                             |
| orf2558 | K09024 | rutF                     | http://www.genome.jp/dbget-bin/www_bget?ko:K09024 | path:ko00240;path:ko01100                                                                                                                                   |
| orf2561 | K04091 | ssuD                     | http://www.genome.jp/dbget-bin/www_bget?ko:K04091 | path:ko00920                                                                                                                                                |
| orf2564 | K15553 | ssuA                     | http://www.genome.jp/dbget-bin/www_bget?ko:K15553 | path:ko00920;path:ko02010                                                                                                                                   |
| orf2567 | K02014 | TC.FEV.OM                | http://www.genome.jp/dbget-bin/www_bget?ko:K02014 |                                                                                                                                                             |
| orf2573 | K08156 | araJ                     | http://www.genome.jp/dbget-bin/www_bget?ko:K08156 |                                                                                                                                                             |
| orf2579 | K06131 | cls                      | http://www.genome.jp/dbget-bin/www_bget?ko:K06131 | path:ko00564;path:ko01100                                                                                                                                   |
| orf2588 | K02335 | DPO1, polA               | http://www.genome.jp/dbget-bin/www_bget?ko:K02335 | path:ko00230;path:ko00240;path:ko01100;path:ko03030;path:ko03410;path:ko03420;path:ko03440                                                                  |
| orf2589 | K07152 | SCO1_2                   | http://www.genome.jp/dbget-bin/www_bget?ko:K07152 |                                                                                                                                                             |
| orf2590 | K02035 | ABC.PE.S                 | http://www.genome.jp/dbget-bin/www_bget?ko:K02035 |                                                                                                                                                             |
| orf2593 | K02471 | yddA                     | http://www.genome.jp/dbget-bin/www_bget?ko:K02471 | path:ko02010                                                                                                                                                |
| orf2594 | K02077 | ABC.ZM.S                 | http://www.genome.jp/dbget-bin/www_bget?ko:K02077 |                                                                                                                                                             |
| orf2595 | K02075 | ABC.ZM.P                 | http://www.genome.jp/dbget-bin/www_bget?ko:K02075 |                                                                                                                                                             |
| orf2596 | K02074 | ABC.ZM.A                 | http://www.genome.jp/dbget-bin/www_bget?ko:K02074 |                                                                                                                                                             |
| orf2599 | K01679 | E4.2.1.2B, fumC          | http://www.genome.jp/dbget-bin/www_bget?ko:K01679 | path:ko00020;path:ko00620;path:ko00720;path:ko01100;path:ko01110;path:ko01120;path:ko01200;path:ko05200;path:ko05211                                        |
| orf2600 | K01053 | E3.1.1.17, gnl, RGN      | http://www.genome.jp/dbget-bin/www_bget?ko:K01053 | path:ko00030;path:ko00053;path:ko00930;path:ko01100;path:ko01110;path:ko01120;path:ko01200;path:ko01220                                                     |
| orf2605 | K01669 | E4.1.99.3, phrB          | http://www.genome.jp/dbget-bin/www_bget?ko:K01669 |                                                                                                                                                             |
| orf2609 | K00411 | UQCRFS1, RIP1, petA      | http://www.genome.jp/dbget-bin/www_bget?ko:K00411 | path:ko00190;path:ko01100;path:ko02020;path:ko04260;path:ko04932;path:ko05010;path:ko05012;path:ko05016                                                     |
| orf2610 | K03675 | grxB                     | http://www.genome.jp/dbget-bin/www_bget?ko:K03675 |                                                                                                                                                             |
| orf2615 | K09474 | phoN                     | http://www.genome.jp/dbget-bin/www_bget?ko:K09474 | path:ko00627;path:ko00740;path:ko01120;path:ko02020                                                                                                         |
| orf2623 | K02039 | phoU                     | http://www.genome.jp/dbget-bin/www_bget?ko:K02039 |                                                                                                                                                             |
| orf2624 | K07657 | phoB                     | http://www.genome.jp/dbget-bin/www_bget?ko:K07657 | path:ko02020                                                                                                                                                |
| orf2625 | K01462 | PDF, def                 | http://www.genome.jp/dbget-bin/www_bget?ko:K01462 |                                                                                                                                                             |
| orf2628 | K07267 | oprB                     | http://www.genome.jp/dbget-bin/www_bget?ko:K07267 |                                                                                                                                                             |
| orf2637 | K00119 | E1.1.99.-                | http://www.genome.jp/dbget-bin/www_bget?ko:K00119 | path:ko00440                                                                                                                                                |
| orf2645 | K00148 | fdhA                     | http://www.genome.jp/dbget-bin/www_bget?ko:K00148 | path:ko00625;path:ko00680;path:ko01100;path:ko01120;path:ko01200                                                                                            |
| orf2655 | K00257 | E1.3.99.-                | http://www.genome.jp/dbget-bin/www_bget?ko:K00257 | path:ko00281;path:ko01110                                                                                                                                   |

|         |        |                         |                                                   |                                                                                                                                                                          |
|---------|--------|-------------------------|---------------------------------------------------|--------------------------------------------------------------------------------------------------------------------------------------------------------------------------|
| orf2657 | K00799 | GST, gst                | http://www.genome.jp/dbget-bin/www_bget?ko:K00799 | path:ko00480;path:ko00980;path:ko00982;path:ko05204                                                                                                                      |
| orf2658 | K13993 | HSP20                   | http://www.genome.jp/dbget-bin/www_bget?ko:K13993 | path:ko04141                                                                                                                                                             |
| orf2661 | K00426 | cydB                    | http://www.genome.jp/dbget-bin/www_bget?ko:K00426 | path:ko00190;path:ko01100;path:ko02020                                                                                                                                   |
| orf2662 | K00425 | cydA                    | http://www.genome.jp/dbget-bin/www_bget?ko:K00425 | path:ko00190;path:ko01100;path:ko02020                                                                                                                                   |
| orf2674 | K11741 | sugE                    | http://www.genome.jp/dbget-bin/www_bget?ko:K11741 |                                                                                                                                                                          |
| orf2682 | K08159 | sotB                    | http://www.genome.jp/dbget-bin/www_bget?ko:K08159 |                                                                                                                                                                          |
| orf2685 | K07507 | mgtC                    | http://www.genome.jp/dbget-bin/www_bget?ko:K07507 |                                                                                                                                                                          |
| orf2708 | K06907 | K06907                  | http://www.genome.jp/dbget-bin/www_bget?ko:K06907 |                                                                                                                                                                          |
| orf2727 | K07119 | K07119                  | http://www.genome.jp/dbget-bin/www_bget?ko:K07119 |                                                                                                                                                                          |
| orf2728 | K00526 | E1.17.4.1B, nrdB, nrdF  | http://www.genome.jp/dbget-bin/www_bget?ko:K00526 | path:ko00230;path:ko00240;path:ko01100                                                                                                                                   |
| orf2734 | K10254 | mycA                    | http://www.genome.jp/dbget-bin/www_bget?ko:K10254 |                                                                                                                                                                          |
| orf2738 | K07106 | murQ                    | http://www.genome.jp/dbget-bin/www_bget?ko:K07106 | path:ko00520                                                                                                                                                             |
| orf2739 | K09001 | anmK                    | http://www.genome.jp/dbget-bin/www_bget?ko:K09001 |                                                                                                                                                                          |
| orf2740 | K02564 | nagB, GNPDa             | http://www.genome.jp/dbget-bin/www_bget?ko:K02564 | path:ko00520;path:ko01100;path:ko01110                                                                                                                                   |
| orf2742 | K07267 | oprB                    | http://www.genome.jp/dbget-bin/www_bget?ko:K07267 |                                                                                                                                                                          |
| orf2743 | K11477 | glcG                    | http://www.genome.jp/dbget-bin/www_bget?ko:K11477 |                                                                                                                                                                          |
| orf2745 | K15977 | K15977                  | http://www.genome.jp/dbget-bin/www_bget?ko:K15977 |                                                                                                                                                                          |
| orf2746 | K01687 | ilvD                    | http://www.genome.jp/dbget-bin/www_bget?ko:K01687 | path:ko00290;path:ko00770;path:ko01100;path:ko01110;path:ko01210;path:ko01230                                                                                            |
| orf2748 | K03535 | gudP                    | http://www.genome.jp/dbget-bin/www_bget?ko:K03535 |                                                                                                                                                                          |
| orf2751 | K06152 | E1.1.99.3G              | http://www.genome.jp/dbget-bin/www_bget?ko:K06152 | path:ko00030;path:ko01100;path:ko01120                                                                                                                                   |
| orf2752 | K06151 | E1.1.99.3A              | http://www.genome.jp/dbget-bin/www_bget?ko:K06151 | path:ko00030;path:ko01100;path:ko01120                                                                                                                                   |
| orf2755 | K02510 | hpaI, hpcH              | http://www.genome.jp/dbget-bin/www_bget?ko:K02510 | path:ko00350;path:ko01120                                                                                                                                                |
| orf2762 | K15861 | fixK                    | http://www.genome.jp/dbget-bin/www_bget?ko:K15861 | path:ko02020                                                                                                                                                             |
| orf2767 | K05351 | E1.1.1.9                | http://www.genome.jp/dbget-bin/www_bget?ko:K05351 | path:ko00040;path:ko01100                                                                                                                                                |
| orf2769 | K00569 | TPMT, tpmT              | http://www.genome.jp/dbget-bin/www_bget?ko:K00569 | path:ko00983                                                                                                                                                             |
| orf2776 | K12979 | lpxO                    | http://www.genome.jp/dbget-bin/www_bget?ko:K12979 |                                                                                                                                                                          |
| orf2777 | K07223 | K07223                  | http://www.genome.jp/dbget-bin/www_bget?ko:K07223 |                                                                                                                                                                          |
| orf2782 | K03809 | wrbA                    | http://www.genome.jp/dbget-bin/www_bget?ko:K03809 |                                                                                                                                                                          |
| orf2784 | K06911 | K06911                  | http://www.genome.jp/dbget-bin/www_bget?ko:K06911 |                                                                                                                                                                          |
| orf2787 | K01840 | manB                    | http://www.genome.jp/dbget-bin/www_bget?ko:K01840 | path:ko00051;path:ko00520;path:ko01100;path:ko01110                                                                                                                      |
| orf2794 | K07170 | K07170                  | http://www.genome.jp/dbget-bin/www_bget?ko:K07170 |                                                                                                                                                                          |
| orf2798 | K14162 | dnaE2                   | http://www.genome.jp/dbget-bin/www_bget?ko:K14162 |                                                                                                                                                                          |
| orf2799 | K14161 | imuB                    | http://www.genome.jp/dbget-bin/www_bget?ko:K14161 |                                                                                                                                                                          |
| orf2804 | K01144 | E3.1.11.5               | http://www.genome.jp/dbget-bin/www_bget?ko:K01144 |                                                                                                                                                                          |
| orf2806 | K01443 | E3.5.1.25, nagA, AMDHD2 | http://www.genome.jp/dbget-bin/www_bget?ko:K01443 | path:ko00520;path:ko01110                                                                                                                                                |
| orf2808 | K01453 | E3.5.1.46               | http://www.genome.jp/dbget-bin/www_bget?ko:K01453 |                                                                                                                                                                          |
| orf2811 | K13243 | dos                     | http://www.genome.jp/dbget-bin/www_bget?ko:K13243 |                                                                                                                                                                          |
| orf2814 | K00100 | E1.1.1.-                | http://www.genome.jp/dbget-bin/www_bget?ko:K00100 | path:ko00051;path:ko00363;path:ko00591;path:ko00625;path:ko00650;path:ko01100;path:ko01120                                                                               |
| orf2816 | K01487 | E3.5.4.3, guaD          | http://www.genome.jp/dbget-bin/www_bget?ko:K01487 | path:ko00230;path:ko01100                                                                                                                                                |
| orf2818 | K02058 | ABC.SS.S                | http://www.genome.jp/dbget-bin/www_bget?ko:K02058 |                                                                                                                                                                          |
| orf2819 | K03382 | atzB                    | http://www.genome.jp/dbget-bin/www_bget?ko:K03382 | path:ko00791;path:ko01100;path:ko01120                                                                                                                                   |
| orf2825 | K01458 | E3.5.1.68               | http://www.genome.jp/dbget-bin/www_bget?ko:K01458 | path:ko00340;path:ko00630                                                                                                                                                |
| orf2832 | K02014 | TC.FEV.OM               | http://www.genome.jp/dbget-bin/www_bget?ko:K02014 |                                                                                                                                                                          |
| orf2834 | K01744 | aspA                    | http://www.genome.jp/dbget-bin/www_bget?ko:K01744 | path:ko00250;path:ko01100                                                                                                                                                |
| orf2837 | K01961 | accC                    | http://www.genome.jp/dbget-bin/www_bget?ko:K01961 | path:ko00061;path:ko00253;path:ko00620;path:ko00640;path:ko00720;path:ko01100;path:ko01110;path:ko01120;path:ko01200;path:ko01212                                        |
| orf2842 | K07160 | K07160                  | http://www.genome.jp/dbget-bin/www_bget?ko:K07160 |                                                                                                                                                                          |
| orf2845 | K00812 | aspB                    | http://www.genome.jp/dbget-bin/www_bget?ko:K00812 | path:ko00250;path:ko00270;path:ko00330;path:ko00350;path:ko00360;path:ko00400;path:ko00401;path:ko00950;path:ko00960;path:ko01100;path:ko01110;path:ko01210;path:ko01230 |
| orf2846 | K02013 | ABC.FEV.A               | http://www.genome.jp/dbget-bin/www_bget?ko:K02013 | path:ko02010                                                                                                                                                             |
| orf2847 | K02015 | ABC.FEV.P               | http://www.genome.jp/dbget-bin/www_bget?ko:K02015 | path:ko02010                                                                                                                                                             |
| orf2848 | K02016 | ABC.FEV.S               | http://www.genome.jp/dbget-bin/www_bget?ko:K02016 | path:ko02010                                                                                                                                                             |
| orf2849 | K16092 | btuB                    | http://www.genome.jp/dbget-bin/www_bget?ko:K16092 |                                                                                                                                                                          |
| orf2855 | K02014 | TC.FEV.OM               | http://www.genome.jp/dbget-bin/www_bget?ko:K02014 |                                                                                                                                                                          |
| orf2856 | K04565 | SOD1                    | http://www.genome.jp/dbget-bin/www_bget?ko:K04565 | path:ko04146;path:ko05014;path:ko05016;path:ko05020                                                                                                                      |
| orf2863 | K01627 | kdsA                    | http://www.genome.jp/dbget-bin/www_bget?ko:K01627 | path:ko00540;path:ko01100                                                                                                                                                |

|         |        |                        |                                                   |                                                                                                                                                             |
|---------|--------|------------------------|---------------------------------------------------|-------------------------------------------------------------------------------------------------------------------------------------------------------------|
| orf2865 | K01937 | E6.3.4.2, pyrG         | http://www.genome.jp/dbget-bin/www_bget?ko:K01937 | path:ko00240;path:ko01100                                                                                                                                   |
| orf2866 | K03075 | secG                   | http://www.genome.jp/dbget-bin/www_bget?ko:K03075 | path:ko03060;path:ko03070                                                                                                                                   |
| orf2867 | K01803 | TPI, tpiA              | http://www.genome.jp/dbget-bin/www_bget?ko:K01803 | path:ko00010;path:ko00051;path:ko00562;path:ko00710;path:ko01100;path:ko01110;path:ko01120;path:ko01200;path:ko01230                                        |
| orf2868 | K03770 | ppiD                   | http://www.genome.jp/dbget-bin/www_bget?ko:K03770 |                                                                                                                                                             |
| orf2869 | K01657 | trpE                   | http://www.genome.jp/dbget-bin/www_bget?ko:K01657 | path:ko00400;path:ko01100;path:ko01110;path:ko01230                                                                                                         |
| orf2870 | K01658 | trpG                   | http://www.genome.jp/dbget-bin/www_bget?ko:K01658 | path:ko00400;path:ko01100;path:ko01110;path:ko01230                                                                                                         |
| orf2871 | K00766 | trpD                   | http://www.genome.jp/dbget-bin/www_bget?ko:K00766 | path:ko00400;path:ko01100;path:ko01110;path:ko01230                                                                                                         |
| orf2872 | K01609 | trpC                   | http://www.genome.jp/dbget-bin/www_bget?ko:K01609 | path:ko00400;path:ko01100;path:ko01110;path:ko01230                                                                                                         |
| orf2874 | K03637 | moaC                   | http://www.genome.jp/dbget-bin/www_bget?ko:K03637 | path:ko00790;path:ko01100;path:ko04122                                                                                                                      |
| orf2875 | K00161 | PDHA, pdhA             | http://www.genome.jp/dbget-bin/www_bget?ko:K00161 | path:ko00010;path:ko00020;path:ko00620;path:ko01100;path:ko01110;path:ko01120;path:ko01200;path:ko04066                                                     |
| orf2877 | K00162 | PDHB, pdhB             | http://www.genome.jp/dbget-bin/www_bget?ko:K00162 | path:ko00010;path:ko00020;path:ko00620;path:ko01100;path:ko01110;path:ko01120;path:ko01200;path:ko04066                                                     |
| orf2878 | K00627 | DLAT, aceF, pdhC       | http://www.genome.jp/dbget-bin/www_bget?ko:K00627 | path:ko00010;path:ko00020;path:ko00620;path:ko01100;path:ko01110;path:ko01120;path:ko01200                                                                  |
| orf2879 | K00382 | DLD, lpd, pdhD         | http://www.genome.jp/dbget-bin/www_bget?ko:K00382 | path:ko00010;path:ko00020;path:ko00260;path:ko00280;path:ko00620;path:ko01100;path:ko01110;path:ko01120;path:ko01200                                        |
| orf2880 | K03644 | lipA                   | http://www.genome.jp/dbget-bin/www_bget?ko:K03644 | path:ko00785;path:ko01100                                                                                                                                   |
| orf2884 | K03743 | K03743                 | http://www.genome.jp/dbget-bin/www_bget?ko:K03743 | path:ko00760                                                                                                                                                |
| orf2885 | K01095 | pgpA                   | http://www.genome.jp/dbget-bin/www_bget?ko:K01095 | path:ko00564;path:ko01100                                                                                                                                   |
| orf2886 | K08309 | slt                    | http://www.genome.jp/dbget-bin/www_bget?ko:K08309 |                                                                                                                                                             |
| orf2889 | K01756 | purB, ADSL             | http://www.genome.jp/dbget-bin/www_bget?ko:K01756 | path:ko00230;path:ko00250;path:ko01100;path:ko01110                                                                                                         |
| orf2891 | K01923 | purC                   | http://www.genome.jp/dbget-bin/www_bget?ko:K01923 | path:ko00230;path:ko01100;path:ko01110                                                                                                                      |
| orf2892 | K01952 | purL, PFAS             | http://www.genome.jp/dbget-bin/www_bget?ko:K01952 | path:ko00230;path:ko01100;path:ko01110                                                                                                                      |
| orf2894 | K01952 | purL, PFAS             | http://www.genome.jp/dbget-bin/www_bget?ko:K01952 | path:ko00230;path:ko01100;path:ko01110                                                                                                                      |
| orf2895 | K01952 | purL, PFAS             | http://www.genome.jp/dbget-bin/www_bget?ko:K01952 | path:ko00230;path:ko01100;path:ko01110                                                                                                                      |
| orf2897 | K07390 | grxD, GLRX5            | http://www.genome.jp/dbget-bin/www_bget?ko:K07390 |                                                                                                                                                             |
| orf2901 | K06131 | cls                    | http://www.genome.jp/dbget-bin/www_bget?ko:K06131 | path:ko00564;path:ko01100                                                                                                                                   |
| orf2906 | K01011 | TST, MPST, sseA        | http://www.genome.jp/dbget-bin/www_bget?ko:K01011 | path:ko00270;path:ko00920;path:ko01100;path:ko01120;path:ko04122                                                                                            |
| orf2907 | K01760 | metC                   | http://www.genome.jp/dbget-bin/www_bget?ko:K01760 | path:ko00270;path:ko00450;path:ko01100;path:ko01110;path:ko01230                                                                                            |
| orf2908 | K13953 | adhP                   | http://www.genome.jp/dbget-bin/www_bget?ko:K13953 | path:ko00010;path:ko00071;path:ko00350;path:ko00625;path:ko00626;path:ko00830;path:ko00980;path:ko00982;path:ko01100;path:ko01110;path:ko01120;path:ko01220 |
| orf2915 | K08137 | galP                   | http://www.genome.jp/dbget-bin/www_bget?ko:K08137 |                                                                                                                                                             |
| orf2917 | K00826 | E2.6.1.42, ilvE        | http://www.genome.jp/dbget-bin/www_bget?ko:K00826 | path:ko00280;path:ko00290;path:ko00770;path:ko01100;path:ko01110;path:ko01210;path:ko01230                                                                  |
| orf2918 | K00358 | E1.6.99.-              | http://www.genome.jp/dbget-bin/www_bget?ko:K00358 |                                                                                                                                                             |
| orf2920 | K00001 | E1.1.1.1, adh          | http://www.genome.jp/dbget-bin/www_bget?ko:K00001 | path:ko00010;path:ko00071;path:ko00350;path:ko00625;path:ko00626;path:ko00830;path:ko00980;path:ko00982;path:ko01100;path:ko01110;path:ko01120;path:ko01220 |
| orf2927 | K02234 | cobW                   | http://www.genome.jp/dbget-bin/www_bget?ko:K02234 | path:ko00860                                                                                                                                                |
| orf2928 | K02230 | cobN                   | http://www.genome.jp/dbget-bin/www_bget?ko:K02230 | path:ko00860;path:ko01100                                                                                                                                   |
| orf2929 | K02229 | cobG                   | http://www.genome.jp/dbget-bin/www_bget?ko:K02229 | path:ko00860;path:ko01100                                                                                                                                   |
| orf2930 | K06042 | E5.4.1.2, cobH, cbiC   | http://www.genome.jp/dbget-bin/www_bget?ko:K06042 | path:ko00860;path:ko01100                                                                                                                                   |
| orf2931 | K03394 | cobI-cbiL              | http://www.genome.jp/dbget-bin/www_bget?ko:K03394 | path:ko00860;path:ko01100                                                                                                                                   |
| orf2932 | K05934 | E2.1.1.131, cobJ, cbiH | http://www.genome.jp/dbget-bin/www_bget?ko:K05934 | path:ko00860;path:ko01100                                                                                                                                   |
| orf2933 | K05895 | cobK, cbiJ             | http://www.genome.jp/dbget-bin/www_bget?ko:K05895 | path:ko00860;path:ko01100                                                                                                                                   |
| orf2934 | K00595 | cobL                   | http://www.genome.jp/dbget-bin/www_bget?ko:K00595 | path:ko00860;path:ko01100                                                                                                                                   |
| orf2935 | K02189 | cbiG                   | http://www.genome.jp/dbget-bin/www_bget?ko:K02189 | path:ko00860;path:ko01100                                                                                                                                   |
| orf2936 | K05936 | cobM, cbiF             | http://www.genome.jp/dbget-bin/www_bget?ko:K05936 | path:ko00860;path:ko01100                                                                                                                                   |
| orf2937 | K02188 | cbiD                   | http://www.genome.jp/dbget-bin/www_bget?ko:K02188 | path:ko00860;path:ko01100                                                                                                                                   |
| orf2938 | K02224 | cobB-cbiA              | http://www.genome.jp/dbget-bin/www_bget?ko:K02224 | path:ko00860;path:ko01100                                                                                                                                   |
| orf2939 | K04758 | feoA                   | http://www.genome.jp/dbget-bin/www_bget?ko:K04758 |                                                                                                                                                             |
| orf2940 | K04759 | feoB                   | http://www.genome.jp/dbget-bin/www_bget?ko:K04759 |                                                                                                                                                             |
| orf2945 | K00382 | DLD, lpd, pdhD         | http://www.genome.jp/dbget-bin/www_bget?ko:K00382 | path:ko00010;path:ko00020;path:ko00260;path:ko00280;path:ko00620;path:ko01100;path:ko01110;path:ko01120;path:ko01200                                        |
| orf2946 | K00658 | DLST, sucB             | http://www.genome.jp/dbget-bin/www_bget?ko:K00658 | path:ko00020;path:ko00310;path:ko01100;path:ko01110;path:ko01120;path:ko01200                                                                               |
| orf2948 | K00164 | OGDH, sucA             | http://www.genome.jp/dbget-bin/www_bget?ko:K00164 | path:ko00020;path:ko00310;path:ko00380;path:ko01100;path:ko01110;path:ko01120;path:ko01200                                                                  |
| orf2951 | K06916 | K06916                 | http://www.genome.jp/dbget-bin/www_bget?ko:K06916 |                                                                                                                                                             |
| orf2955 | K00036 | G6PD, zwf              | http://www.genome.jp/dbget-bin/www_bget?ko:K00036 | path:ko00030;path:ko00480;path:ko01100;path:ko01110;path:ko01120;path:ko01200                                                                               |

|         |        |                                                      |                                                   |                                                                                                                      |
|---------|--------|------------------------------------------------------|---------------------------------------------------|----------------------------------------------------------------------------------------------------------------------|
| orf2956 | K00133 | asd                                                  | http://www.genome.jp/dbget-bin/www_bget?ko:K00133 | path:ko00260;path:ko00270;path:ko00300;path:ko01100;path:ko01110;path:ko01120;path:ko01210;path:ko01230              |
| orf2957 | K00241 | sdhC                                                 | http://www.genome.jp/dbget-bin/www_bget?ko:K00241 | path:ko00020;path:ko00190;path:ko00650;path:ko00720;path:ko01100;path:ko01110;path:ko01120;path:ko01200              |
| orf2958 | K00242 | sdhD                                                 | http://www.genome.jp/dbget-bin/www_bget?ko:K00242 | path:ko00020;path:ko00190;path:ko00650;path:ko00720;path:ko01100;path:ko01110;path:ko01120;path:ko01200              |
| orf2959 | K00239 | sdhA                                                 | http://www.genome.jp/dbget-bin/www_bget?ko:K00239 | path:ko00020;path:ko00190;path:ko00650;path:ko00720;path:ko01100;path:ko01110;path:ko01120;path:ko01200;path:ko05134 |
| orf2960 | K00240 | sdhB                                                 | http://www.genome.jp/dbget-bin/www_bget?ko:K00240 | path:ko00020;path:ko00190;path:ko00650;path:ko00720;path:ko01100;path:ko01110;path:ko01120;path:ko01200              |
| orf2968 | K07062 | K07062                                               | http://www.genome.jp/dbget-bin/www_bget?ko:K07062 |                                                                                                                      |
| orf2970 | K03205 | virD4, lvhD4                                         | http://www.genome.jp/dbget-bin/www_bget?ko:K03205 | path:ko03070                                                                                                         |
| orf2972 | K03196 | virB11, lvhB11                                       | http://www.genome.jp/dbget-bin/www_bget?ko:K03196 | path:ko03070;path:ko05120                                                                                            |
| orf2973 | K03197 | virB2, lvhB2                                         | http://www.genome.jp/dbget-bin/www_bget?ko:K03197 | path:ko03070;path:ko05134                                                                                            |
| orf2974 | K03198 | virB3, lvhB3                                         | http://www.genome.jp/dbget-bin/www_bget?ko:K03198 | path:ko03070                                                                                                         |
| orf2975 | K03199 | virB4, lvhB4                                         | http://www.genome.jp/dbget-bin/www_bget?ko:K03199 | path:ko03070                                                                                                         |
| orf2977 | K07344 | trbL                                                 | http://www.genome.jp/dbget-bin/www_bget?ko:K07344 |                                                                                                                      |
| orf2978 | K03200 | virB5, lvhB5                                         | http://www.genome.jp/dbget-bin/www_bget?ko:K03200 | path:ko03070                                                                                                         |
| orf2979 | K03204 | virB9, lvhB9                                         | http://www.genome.jp/dbget-bin/www_bget?ko:K03204 | path:ko03070                                                                                                         |
| orf2980 | K03195 | virB10, lvhB10                                       | http://www.genome.jp/dbget-bin/www_bget?ko:K03195 | path:ko03070                                                                                                         |
| orf2982 | K16871 | POP2                                                 | http://www.genome.jp/dbget-bin/www_bget?ko:K16871 | path:ko00250;path:ko00650;path:ko01100                                                                               |
| orf2983 | K00428 | E1.11.1.5                                            | http://www.genome.jp/dbget-bin/www_bget?ko:K00428 |                                                                                                                      |
| orf2984 | K16087 | TC.FEV.OM3, tbpA, hemR, lbpA, hpuB, bhuR, hugA, hmbR | http://www.genome.jp/dbget-bin/www_bget?ko:K16087 |                                                                                                                      |
| orf2986 | K00426 | cydB                                                 | http://www.genome.jp/dbget-bin/www_bget?ko:K00426 | path:ko00190;path:ko01100;path:ko02020                                                                               |
| orf2987 | K00425 | cydA                                                 | http://www.genome.jp/dbget-bin/www_bget?ko:K00425 | path:ko00190;path:ko01100;path:ko02020                                                                               |
| orf2988 | K16012 | cydC                                                 | http://www.genome.jp/dbget-bin/www_bget?ko:K16012 | path:ko02010                                                                                                         |
| orf2989 | K16013 | cydD                                                 | http://www.genome.jp/dbget-bin/www_bget?ko:K16013 | path:ko02010                                                                                                         |
| orf2996 | K15549 | mdtN                                                 | http://www.genome.jp/dbget-bin/www_bget?ko:K15549 |                                                                                                                      |
| orf2997 | K15547 | mdtO                                                 | http://www.genome.jp/dbget-bin/www_bget?ko:K15547 |                                                                                                                      |
| orf3001 | K00799 | GST, gst                                             | http://www.genome.jp/dbget-bin/www_bget?ko:K00799 | path:ko00480;path:ko00980;path:ko00982;path:ko05204                                                                  |
| orf3002 | K06999 | K06999                                               | http://www.genome.jp/dbget-bin/www_bget?ko:K06999 |                                                                                                                      |
| orf3008 | K01246 | tag                                                  | http://www.genome.jp/dbget-bin/www_bget?ko:K01246 | path:ko03410                                                                                                         |
| orf3009 | K03919 | alkB                                                 | http://www.genome.jp/dbget-bin/www_bget?ko:K03919 |                                                                                                                      |
| orf3010 | K09990 | K09990                                               | http://www.genome.jp/dbget-bin/www_bget?ko:K09990 |                                                                                                                      |
| orf3011 | K10778 | ada                                                  | http://www.genome.jp/dbget-bin/www_bget?ko:K10778 |                                                                                                                      |
| orf3021 | K01420 | fnr                                                  | http://www.genome.jp/dbget-bin/www_bget?ko:K01420 |                                                                                                                      |
| orf3024 | K13771 | nsrR                                                 | http://www.genome.jp/dbget-bin/www_bget?ko:K13771 | path:ko05132                                                                                                         |
| orf3025 | K13771 | nsrR                                                 | http://www.genome.jp/dbget-bin/www_bget?ko:K13771 | path:ko05132                                                                                                         |
| orf3027 | K03750 | moeA                                                 | http://www.genome.jp/dbget-bin/www_bget?ko:K03750 |                                                                                                                      |
| orf3028 | K03753 | mobB                                                 | http://www.genome.jp/dbget-bin/www_bget?ko:K03753 |                                                                                                                      |
| orf3029 | K03752 | mobA                                                 | http://www.genome.jp/dbget-bin/www_bget?ko:K03752 |                                                                                                                      |
| orf3030 | K02379 | fdhD                                                 | http://www.genome.jp/dbget-bin/www_bget?ko:K02379 |                                                                                                                      |
| orf3031 | K00117 | gcd                                                  | http://www.genome.jp/dbget-bin/www_bget?ko:K00117 | path:ko00030;path:ko01100;path:ko01110                                                                               |
| orf3032 | K00117 | gcd                                                  | http://www.genome.jp/dbget-bin/www_bget?ko:K00117 | path:ko00030;path:ko01100;path:ko01110                                                                               |
| orf3034 | K01246 | tag                                                  | http://www.genome.jp/dbget-bin/www_bget?ko:K01246 | path:ko03410                                                                                                         |
| orf3036 | K00681 | ggt                                                  | http://www.genome.jp/dbget-bin/www_bget?ko:K00681 | path:ko00430;path:ko00460;path:ko00480;path:ko00590;path:ko01100                                                     |
| orf3044 | K09712 | K09712                                               | http://www.genome.jp/dbget-bin/www_bget?ko:K09712 |                                                                                                                      |
| orf3053 | K15358 | E3.5.2.18                                            | http://www.genome.jp/dbget-bin/www_bget?ko:K15358 | path:ko00760                                                                                                         |
| orf3058 | K01464 | DPYS, dht, hydA                                      | http://www.genome.jp/dbget-bin/www_bget?ko:K01464 | path:ko00240;path:ko00410;path:ko00770;path:ko00983;path:ko01100                                                     |
| orf3059 | K09017 | rutR                                                 | http://www.genome.jp/dbget-bin/www_bget?ko:K09017 |                                                                                                                      |
| orf3061 | K00266 | gltD                                                 | http://www.genome.jp/dbget-bin/www_bget?ko:K00266 | path:ko00250;path:ko00910;path:ko01100;path:ko01110;path:ko01120;path:ko01230                                        |
| orf3062 | K17723 | preA                                                 | http://www.genome.jp/dbget-bin/www_bget?ko:K17723 | path:ko00240;path:ko00410;path:ko00770;path:ko01100                                                                  |
| orf3066 | K09252 | E3.1.1.73                                            | http://www.genome.jp/dbget-bin/www_bget?ko:K09252 |                                                                                                                      |
| orf3070 | K03862 | vanA                                                 | http://www.genome.jp/dbget-bin/www_bget?ko:K03862 | path:ko00627;path:ko01120                                                                                            |
| orf3071 | K03863 | vanB                                                 | http://www.genome.jp/dbget-bin/www_bget?ko:K03863 | path:ko00627;path:ko01120                                                                                            |
| orf3074 | K06045 | shc                                                  | http://www.genome.jp/dbget-bin/www_bget?ko:K06045 | path:ko00909;path:ko01110                                                                                            |
| orf3077 | K03307 | TC.SSS                                               | http://www.genome.jp/dbget-bin/www_bget?ko:K03307 |                                                                                                                      |
| orf3078 | K01488 | E3.5.4.4, ADA, add                                   | http://www.genome.jp/dbget-bin/www_bget?ko:K01488 | path:ko00230;path:ko01100;path:ko05340                                                                               |
| orf3079 | K02014 | TC.FEV.OM                                            | http://www.genome.jp/dbget-bin/www_bget?ko:K02014 |                                                                                                                      |

|         |        |                       |                                                   |                                                                                                                                                                                                    |
|---------|--------|-----------------------|---------------------------------------------------|----------------------------------------------------------------------------------------------------------------------------------------------------------------------------------------------------|
| orf3082 | K00036 | G6PD, zwf             | http://www.genome.jp/dbget-bin/www_bget?ko:K00036 | path:ko00030;path:ko00480;path:ko01100;path:ko01110;path:ko01120;path:ko01200                                                                                                                      |
| orf3083 | K00033 | PGD, gnd              | http://www.genome.jp/dbget-bin/www_bget?ko:K00033 | path:ko00030;path:ko00480;path:ko01100;path:ko01110;path:ko01120;path:ko01200                                                                                                                      |
| orf3085 | K13810 | tal-pgi               | http://www.genome.jp/dbget-bin/www_bget?ko:K13810 | path:ko00010;path:ko00030;path:ko00500;path:ko00520;path:ko01100;path:ko01110;path:ko01120;path:ko01200;path:ko01230                                                                               |
| orf3086 | K00615 | E2.2.1.1, tktA, tktB  | http://www.genome.jp/dbget-bin/www_bget?ko:K00615 | path:ko00030;path:ko00710;path:ko01051;path:ko01100;path:ko01110;path:ko01120;path:ko01200;path:ko01230                                                                                            |
| orf3089 | K08137 | galP                  | http://www.genome.jp/dbget-bin/www_bget?ko:K08137 |                                                                                                                                                                                                    |
| orf3090 | K01623 | ALDO                  | http://www.genome.jp/dbget-bin/www_bget?ko:K01623 | path:ko00010;path:ko00030;path:ko00051;path:ko00680;path:ko00710;path:ko01100;path:ko01110;path:ko01120;path:ko01200;path:ko01230                                                                  |
| orf3094 | K00330 | nuoA                  | http://www.genome.jp/dbget-bin/www_bget?ko:K00330 | path:ko00190;path:ko01100                                                                                                                                                                          |
| orf3095 | K00331 | nuoB                  | http://www.genome.jp/dbget-bin/www_bget?ko:K00331 | path:ko00190;path:ko01100                                                                                                                                                                          |
| orf3096 | K13378 | nuoCD                 | http://www.genome.jp/dbget-bin/www_bget?ko:K13378 | path:ko00190;path:ko01100                                                                                                                                                                          |
| orf3097 | K00334 | nuoE                  | http://www.genome.jp/dbget-bin/www_bget?ko:K00334 | path:ko00190;path:ko01100                                                                                                                                                                          |
| orf3098 | K00335 | nuoF                  | http://www.genome.jp/dbget-bin/www_bget?ko:K00335 | path:ko00190;path:ko01100                                                                                                                                                                          |
| orf3099 | K00336 | nuoG                  | http://www.genome.jp/dbget-bin/www_bget?ko:K00336 | path:ko00190;path:ko01100                                                                                                                                                                          |
| orf3100 | K00337 | nuoH                  | http://www.genome.jp/dbget-bin/www_bget?ko:K00337 | path:ko00190;path:ko01100                                                                                                                                                                          |
| orf3101 | K00338 | nuoI                  | http://www.genome.jp/dbget-bin/www_bget?ko:K00338 | path:ko00190;path:ko01100                                                                                                                                                                          |
| orf3102 | K00339 | nuoJ                  | http://www.genome.jp/dbget-bin/www_bget?ko:K00339 | path:ko00190;path:ko01100                                                                                                                                                                          |
| orf3103 | K00340 | nuoK                  | http://www.genome.jp/dbget-bin/www_bget?ko:K00340 | path:ko00190;path:ko01100                                                                                                                                                                          |
| orf3104 | K00341 | nuoL                  | http://www.genome.jp/dbget-bin/www_bget?ko:K00341 | path:ko00190;path:ko01100                                                                                                                                                                          |
| orf3105 | K00342 | nuoM                  | http://www.genome.jp/dbget-bin/www_bget?ko:K00342 | path:ko00190;path:ko01100                                                                                                                                                                          |
| orf3106 | K00343 | nuoN                  | http://www.genome.jp/dbget-bin/www_bget?ko:K00343 | path:ko00190;path:ko01100                                                                                                                                                                          |
| orf3117 | K02474 | wbpO                  | http://www.genome.jp/dbget-bin/www_bget?ko:K02474 | path:ko00520                                                                                                                                                                                       |
| orf3119 | K01953 | asnB, ASNS            | http://www.genome.jp/dbget-bin/www_bget?ko:K01953 | path:ko00250;path:ko01100;path:ko01110                                                                                                                                                             |
| orf3121 | K00012 | UGDH, ugd             | http://www.genome.jp/dbget-bin/www_bget?ko:K00012 | path:ko00040;path:ko00053;path:ko00500;path:ko00520;path:ko01100;path:ko01110                                                                                                                      |
| orf3122 | K09688 | ABC-2.CPSE.P          | http://www.genome.jp/dbget-bin/www_bget?ko:K09688 | path:ko02010                                                                                                                                                                                       |
| orf3123 | K09689 | ABC-2.CPSE.A          | http://www.genome.jp/dbget-bin/www_bget?ko:K09689 | path:ko02010                                                                                                                                                                                       |
| orf3126 | K08679 | E5.1.3.6              | http://www.genome.jp/dbget-bin/www_bget?ko:K08679 | path:ko00500;path:ko00520;path:ko01100                                                                                                                                                             |
| orf3128 | K01991 | ABC-2.OM, wza         | http://www.genome.jp/dbget-bin/www_bget?ko:K01991 |                                                                                                                                                                                                    |
| orf3130 | K01728 | E4.2.2.2, pel         | http://www.genome.jp/dbget-bin/www_bget?ko:K01728 | path:ko00040                                                                                                                                                                                       |
| orf3132 | K02014 | TC.FEV.OM             | http://www.genome.jp/dbget-bin/www_bget?ko:K02014 |                                                                                                                                                                                                    |
| orf3134 | K03088 | SIG3.2, rpoE          | http://www.genome.jp/dbget-bin/www_bget?ko:K03088 |                                                                                                                                                                                                    |
| orf3137 | K03561 | exbB                  | http://www.genome.jp/dbget-bin/www_bget?ko:K03561 |                                                                                                                                                                                                    |
| orf3138 | K03559 | exbD                  | http://www.genome.jp/dbget-bin/www_bget?ko:K03559 |                                                                                                                                                                                                    |
| orf3139 | K03832 | tonB                  | http://www.genome.jp/dbget-bin/www_bget?ko:K03832 |                                                                                                                                                                                                    |
| orf3141 | K07789 | mdtC                  | http://www.genome.jp/dbget-bin/www_bget?ko:K07789 | path:ko02020                                                                                                                                                                                       |
| orf3159 | K03530 | hupB                  | http://www.genome.jp/dbget-bin/www_bget?ko:K03530 |                                                                                                                                                                                                    |
| orf3160 | K01869 | LARS, leuS            | http://www.genome.jp/dbget-bin/www_bget?ko:K01869 | path:ko00970                                                                                                                                                                                       |
| orf3161 | K03643 | lptE, rlpB            | http://www.genome.jp/dbget-bin/www_bget?ko:K03643 |                                                                                                                                                                                                    |
| orf3162 | K02340 | DPO3D1, holA          | http://www.genome.jp/dbget-bin/www_bget?ko:K02340 | path:ko00230;path:ko00240;path:ko01100;path:ko03030;path:ko03430;path:ko03440                                                                                                                      |
| orf3165 | K07221 | oprO_P                | http://www.genome.jp/dbget-bin/www_bget?ko:K07221 |                                                                                                                                                                                                    |
| orf3166 | K02040 | pstS                  | http://www.genome.jp/dbget-bin/www_bget?ko:K02040 | path:ko02010;path:ko02020;path:ko05152                                                                                                                                                             |
| orf3168 | K00971 | manC, cpsB            | http://www.genome.jp/dbget-bin/www_bget?ko:K00971 | path:ko00051;path:ko00520;path:ko01100;path:ko01110                                                                                                                                                |
| orf3170 | K01093 | appA                  | http://www.genome.jp/dbget-bin/www_bget?ko:K01093 | path:ko00562;path:ko00627;path:ko00740;path:ko01120                                                                                                                                                |
| orf3171 | K07316 | mod                   | http://www.genome.jp/dbget-bin/www_bget?ko:K07316 |                                                                                                                                                                                                    |
| orf3177 | K07782 | sdiA                  | http://www.genome.jp/dbget-bin/www_bget?ko:K07782 | path:ko02020                                                                                                                                                                                       |
| orf3186 | K15034 | yaeJ                  | http://www.genome.jp/dbget-bin/www_bget?ko:K15034 |                                                                                                                                                                                                    |
| orf3187 | K07267 | oprB                  | http://www.genome.jp/dbget-bin/www_bget?ko:K07267 |                                                                                                                                                                                                    |
| orf3193 | K07567 | tdcF                  | http://www.genome.jp/dbget-bin/www_bget?ko:K07567 |                                                                                                                                                                                                    |
| orf3195 | K00274 | MAO, aofH             | http://www.genome.jp/dbget-bin/www_bget?ko:K00274 | path:ko00260;path:ko00330;path:ko00340;path:ko00350;path:ko00360;path:ko00380;path:ko00950;path:ko00982;path:ko01100;path:ko01110;path:ko04726;path:ko04728;path:ko05030;path:ko05031;path:ko05034 |
| orf3197 | K07034 | K07034                | http://www.genome.jp/dbget-bin/www_bget?ko:K07034 |                                                                                                                                                                                                    |
| orf3198 | K10778 | ada                   | http://www.genome.jp/dbget-bin/www_bget?ko:K10778 |                                                                                                                                                                                                    |
| orf3202 | K03781 | katE, CAT, catB, srpA | http://www.genome.jp/dbget-bin/www_bget?ko:K03781 | path:ko00380;path:ko00630;path:ko01110;path:ko04068;path:ko04146;path:ko05014                                                                                                                      |
| orf3203 | K07401 | K07401                | http://www.genome.jp/dbget-bin/www_bget?ko:K07401 |                                                                                                                                                                                                    |
| orf3208 | K15555 | ssuB                  | http://www.genome.jp/dbget-bin/www_bget?ko:K15555 | path:ko00920;path:ko02010                                                                                                                                                                          |
| orf3209 | K15554 | ssuC                  | http://www.genome.jp/dbget-bin/www_bget?ko:K15554 | path:ko00920;path:ko02010                                                                                                                                                                          |

|         |        |                        |                                                   |                                                                                                                                   |
|---------|--------|------------------------|---------------------------------------------------|-----------------------------------------------------------------------------------------------------------------------------------|
| orf3211 | K00102 | E1.1.2.4, dld          | http://www.genome.jp/dbget-bin/www_bget?ko:K00102 | path:ko00620                                                                                                                      |
| orf3212 | K02039 | phoU                   | http://www.genome.jp/dbget-bin/www_bget?ko:K02039 |                                                                                                                                   |
| orf3213 | K02036 | pstB                   | http://www.genome.jp/dbget-bin/www_bget?ko:K02036 | path:ko02010                                                                                                                      |
| orf3214 | K02038 | pstA                   | http://www.genome.jp/dbget-bin/www_bget?ko:K02038 | path:ko02010                                                                                                                      |
| orf3215 | K02037 | pstC                   | http://www.genome.jp/dbget-bin/www_bget?ko:K02037 | path:ko02010                                                                                                                      |
| orf3217 | K03306 | TC.PIT                 | http://www.genome.jp/dbget-bin/www_bget?ko:K03306 |                                                                                                                                   |
| orf3230 | K03496 | parA, soj              | http://www.genome.jp/dbget-bin/www_bget?ko:K03496 |                                                                                                                                   |
| orf3231 | K07319 | yhdJ                   | http://www.genome.jp/dbget-bin/www_bget?ko:K07319 |                                                                                                                                   |
| orf3236 | K01238 | E3.2.1.-               | http://www.genome.jp/dbget-bin/www_bget?ko:K01238 |                                                                                                                                   |
| orf3239 | K03205 | virD4, lvhD4           | http://www.genome.jp/dbget-bin/www_bget?ko:K03205 | path:ko03070                                                                                                                      |
| orf3247 | K01173 | ENDOG                  | http://www.genome.jp/dbget-bin/www_bget?ko:K01173 | path:ko04210                                                                                                                      |
| orf3249 | K02996 | RP-S9, MRPS9, rpsI     | http://www.genome.jp/dbget-bin/www_bget?ko:K02996 | path:ko03010                                                                                                                      |
| orf3250 | K02871 | RP-L13, MRPL13, rplM   | http://www.genome.jp/dbget-bin/www_bget?ko:K02871 | path:ko03010                                                                                                                      |
| orf3254 | K04751 | glnB                   | http://www.genome.jp/dbget-bin/www_bget?ko:K04751 | path:ko02020                                                                                                                      |
| orf3255 | K01915 | glnA                   | http://www.genome.jp/dbget-bin/www_bget?ko:K01915 | path:ko00250;path:ko00330;path:ko00630;path:ko00910;path:ko01100;path:ko01120;path:ko01230;path:ko02020;path:ko04724;path:ko04727 |
| orf3260 | K01241 | amn                    | http://www.genome.jp/dbget-bin/www_bget?ko:K01241 | path:ko00230                                                                                                                      |
| orf3262 | K02483 | K02483                 | http://www.genome.jp/dbget-bin/www_bget?ko:K02483 |                                                                                                                                   |
| orf3264 | K12262 | cybB                   | http://www.genome.jp/dbget-bin/www_bget?ko:K12262 |                                                                                                                                   |
| orf3267 | K07267 | oprB                   | http://www.genome.jp/dbget-bin/www_bget?ko:K07267 |                                                                                                                                   |
| orf3268 | K07267 | oprB                   | http://www.genome.jp/dbget-bin/www_bget?ko:K07267 |                                                                                                                                   |
| orf3270 | K11811 | arsH                   | http://www.genome.jp/dbget-bin/www_bget?ko:K11811 |                                                                                                                                   |
| orf3271 | K03893 | arsB                   | http://www.genome.jp/dbget-bin/www_bget?ko:K03893 |                                                                                                                                   |
| orf3272 | K00537 | ARSC1, arsC            | http://www.genome.jp/dbget-bin/www_bget?ko:K00537 |                                                                                                                                   |
| orf3276 | K06021 | E3.6.3.27              | http://www.genome.jp/dbget-bin/www_bget?ko:K06021 |                                                                                                                                   |
| orf3277 | K02069 | ABC.X2.P               | http://www.genome.jp/dbget-bin/www_bget?ko:K02069 |                                                                                                                                   |
| orf3282 | K07497 | K07497                 | http://www.genome.jp/dbget-bin/www_bget?ko:K07497 |                                                                                                                                   |
| orf3283 | K01057 | PGLS, pgl, devB        | http://www.genome.jp/dbget-bin/www_bget?ko:K01057 | path:ko00030;path:ko01100;path:ko01110;path:ko01120;path:ko01200                                                                  |
| orf3284 | K01807 | rpiA                   | http://www.genome.jp/dbget-bin/www_bget?ko:K01807 | path:ko00030;path:ko00710;path:ko01100;path:ko01110;path:ko01120;path:ko01200;path:ko01230                                        |
| orf3285 | K00851 | E2.7.1.12, gntK, idnK  | http://www.genome.jp/dbget-bin/www_bget?ko:K00851 | path:ko00030;path:ko01100;path:ko01110;path:ko01120;path:ko01200                                                                  |
| orf3286 | K01104 | E3.1.3.48              | http://www.genome.jp/dbget-bin/www_bget?ko:K01104 |                                                                                                                                   |
| orf3289 | K00354 | E1.6.99.1              | http://www.genome.jp/dbget-bin/www_bget?ko:K00354 |                                                                                                                                   |
| orf3290 | K04756 | ahpD                   | http://www.genome.jp/dbget-bin/www_bget?ko:K04756 |                                                                                                                                   |
| orf3291 | K03386 | E1.11.1.15, PRDX, ahpC | http://www.genome.jp/dbget-bin/www_bget?ko:K03386 |                                                                                                                                   |
| orf3292 | K04761 | oxyR                   | http://www.genome.jp/dbget-bin/www_bget?ko:K04761 |                                                                                                                                   |
| orf3293 | K02919 | RP-L36, MRPL36, rpmJ   | http://www.genome.jp/dbget-bin/www_bget?ko:K02919 | path:ko03010                                                                                                                      |
| orf3296 | K02557 | motB                   | http://www.genome.jp/dbget-bin/www_bget?ko:K02557 | path:ko02030;path:ko02040                                                                                                         |
| orf3299 | K01092 | E3.1.3.25, IMPA, suhB  | http://www.genome.jp/dbget-bin/www_bget?ko:K01092 | path:ko00521;path:ko00562;path:ko01100;path:ko01110;path:ko04070                                                                  |
| orf3300 | K02356 | efp                    | http://www.genome.jp/dbget-bin/www_bget?ko:K02356 |                                                                                                                                   |
| orf3301 | K01843 | kamA                   | http://www.genome.jp/dbget-bin/www_bget?ko:K01843 | path:ko00310                                                                                                                      |
| orf3303 | K04568 | poxA                   | http://www.genome.jp/dbget-bin/www_bget?ko:K04568 | path:ko00970                                                                                                                      |
| orf3304 | K00788 | thiE                   | http://www.genome.jp/dbget-bin/www_bget?ko:K00788 | path:ko00730;path:ko01100                                                                                                         |
| orf3308 | K09888 | zapA                   | http://www.genome.jp/dbget-bin/www_bget?ko:K09888 |                                                                                                                                   |
| orf3309 | K01934 | E6.3.3.2               | http://www.genome.jp/dbget-bin/www_bget?ko:K01934 | path:ko00670;path:ko01100                                                                                                         |
| orf3310 | K09769 | K09769                 | http://www.genome.jp/dbget-bin/www_bget?ko:K09769 |                                                                                                                                   |
| orf3311 | K03196 | virB11, lvhB11         | http://www.genome.jp/dbget-bin/www_bget?ko:K03196 | path:ko03070;path:ko05120                                                                                                         |
| orf3312 | K03197 | virB2, lvhB2           | http://www.genome.jp/dbget-bin/www_bget?ko:K03197 | path:ko03070;path:ko05134                                                                                                         |
| orf3313 | K03198 | virB3, lvhB3           | http://www.genome.jp/dbget-bin/www_bget?ko:K03198 | path:ko03070                                                                                                                      |
| orf3314 | K03199 | virB4, lvhB4           | http://www.genome.jp/dbget-bin/www_bget?ko:K03199 | path:ko03070                                                                                                                      |
| orf3317 | K07344 | trbL                   | http://www.genome.jp/dbget-bin/www_bget?ko:K07344 |                                                                                                                                   |
| orf3318 | K03200 | virB5, lvhB5           | http://www.genome.jp/dbget-bin/www_bget?ko:K03200 | path:ko03070                                                                                                                      |
| orf3319 | K03204 | virB9, lvhB9           | http://www.genome.jp/dbget-bin/www_bget?ko:K03204 | path:ko03070                                                                                                                      |
| orf3320 | K03195 | virB10, lvhB10         | http://www.genome.jp/dbget-bin/www_bget?ko:K03195 | path:ko03070                                                                                                                      |
| orf3326 | K15238 | linX                   | http://www.genome.jp/dbget-bin/www_bget?ko:K15238 | path:ko00361;path:ko01100;path:ko01120                                                                                            |
| orf3327 | K14161 | imuB                   | http://www.genome.jp/dbget-bin/www_bget?ko:K14161 |                                                                                                                                   |
| orf3328 | K14160 | imuA                   | http://www.genome.jp/dbget-bin/www_bget?ko:K14160 |                                                                                                                                   |

|         |        |                 |                                                   |                                                                                                                                                             |
|---------|--------|-----------------|---------------------------------------------------|-------------------------------------------------------------------------------------------------------------------------------------------------------------|
| orf3329 | K03657 | uvrD, pcrA      | http://www.genome.jp/dbget-bin/www_bget?ko:K03657 | path:ko03420;path:ko03430                                                                                                                                   |
| orf3331 | K07240 | chrA            | http://www.genome.jp/dbget-bin/www_bget?ko:K07240 |                                                                                                                                                             |
| orf3332 | K12262 | cybB            | http://www.genome.jp/dbget-bin/www_bget?ko:K12262 |                                                                                                                                                             |
| orf3335 | K00537 | ARSC1, arsC     | http://www.genome.jp/dbget-bin/www_bget?ko:K00537 |                                                                                                                                                             |
| orf3336 | K03893 | arsB            | http://www.genome.jp/dbget-bin/www_bget?ko:K03893 |                                                                                                                                                             |
| orf3337 | K11811 | arsH            | http://www.genome.jp/dbget-bin/www_bget?ko:K11811 |                                                                                                                                                             |
| orf3340 | K03316 | TC.CPA1         | http://www.genome.jp/dbget-bin/www_bget?ko:K03316 |                                                                                                                                                             |
| orf3341 | K06218 | relE            | http://www.genome.jp/dbget-bin/www_bget?ko:K06218 |                                                                                                                                                             |
| orf3347 | K01961 | accC            | http://www.genome.jp/dbget-bin/www_bget?ko:K01961 | path:ko00061;path:ko00253;path:ko00620;path:ko00640;path:ko00720;path:ko01100;path:ko01110;path:ko01120;path:ko01200;path:ko01212                           |
| orf3349 | K07160 | K07160          | http://www.genome.jp/dbget-bin/www_bget?ko:K07160 |                                                                                                                                                             |
| orf3354 | K00135 | gabD            | http://www.genome.jp/dbget-bin/www_bget?ko:K00135 | path:ko00250;path:ko00310;path:ko00350;path:ko00650;path:ko01100;path:ko01120                                                                               |
| orf3355 | K03457 | TC.NCS1         | http://www.genome.jp/dbget-bin/www_bget?ko:K03457 |                                                                                                                                                             |
| orf3358 | K15357 | nicD            | http://www.genome.jp/dbget-bin/www_bget?ko:K15357 | path:ko00760;path:ko01120                                                                                                                                   |
| orf3359 | K01799 | nicE, maiA      | http://www.genome.jp/dbget-bin/www_bget?ko:K01799 | path:ko00650;path:ko00760;path:ko01120                                                                                                                      |
| orf3360 | K13995 | nicF            | http://www.genome.jp/dbget-bin/www_bget?ko:K13995 | path:ko00760;path:ko01120                                                                                                                                   |
| orf3361 | K18028 | nicX            | http://www.genome.jp/dbget-bin/www_bget?ko:K18028 | path:ko00760;path:ko01120                                                                                                                                   |
| orf3362 | K14974 | nicC            | http://www.genome.jp/dbget-bin/www_bget?ko:K14974 | path:ko00760;path:ko01120                                                                                                                                   |
| orf3363 | K02014 | TC.FEV.OM       | http://www.genome.jp/dbget-bin/www_bget?ko:K02014 |                                                                                                                                                             |
| orf3364 | K07154 | hipA            | http://www.genome.jp/dbget-bin/www_bget?ko:K07154 |                                                                                                                                                             |
| orf3365 | K14162 | dnaE2           | http://www.genome.jp/dbget-bin/www_bget?ko:K14162 |                                                                                                                                                             |
| orf3366 | K14162 | dnaE2           | http://www.genome.jp/dbget-bin/www_bget?ko:K14162 |                                                                                                                                                             |
| orf3367 | K14162 | dnaE2           | http://www.genome.jp/dbget-bin/www_bget?ko:K14162 |                                                                                                                                                             |
| orf3368 | K14162 | dnaE2           | http://www.genome.jp/dbget-bin/www_bget?ko:K14162 |                                                                                                                                                             |
| orf3369 | K14162 | dnaE2           | http://www.genome.jp/dbget-bin/www_bget?ko:K14162 |                                                                                                                                                             |
| orf3370 | K14162 | dnaE2           | http://www.genome.jp/dbget-bin/www_bget?ko:K14162 |                                                                                                                                                             |
| orf3371 | K14161 | imuB            | http://www.genome.jp/dbget-bin/www_bget?ko:K14161 |                                                                                                                                                             |
| orf3372 | K14160 | imuA            | http://www.genome.jp/dbget-bin/www_bget?ko:K14160 |                                                                                                                                                             |
| orf3381 | K10680 | nemA            | http://www.genome.jp/dbget-bin/www_bget?ko:K10680 | path:ko00633;path:ko01120                                                                                                                                   |
| orf3382 | K00135 | gabD            | http://www.genome.jp/dbget-bin/www_bget?ko:K00135 | path:ko00250;path:ko00310;path:ko00350;path:ko00650;path:ko01100;path:ko01120                                                                               |
| orf3383 | K01908 | E6.2.1.17, prpE | http://www.genome.jp/dbget-bin/www_bget?ko:K01908 | path:ko00640;path:ko01100                                                                                                                                   |
| orf3384 | K07222 | K07222          | http://www.genome.jp/dbget-bin/www_bget?ko:K07222 |                                                                                                                                                             |
| orf3387 | K07123 | K07123          | http://www.genome.jp/dbget-bin/www_bget?ko:K07123 |                                                                                                                                                             |
| orf3390 | K01502 | E3.5.5.7        | http://www.genome.jp/dbget-bin/www_bget?ko:K01502 | path:ko00643;path:ko01120                                                                                                                                   |
| orf3394 | K00001 | E1.1.1.1, adh   | http://www.genome.jp/dbget-bin/www_bget?ko:K00001 | path:ko00010;path:ko00071;path:ko00350;path:ko00625;path:ko00626;path:ko00830;path:ko00980;path:ko00982;path:ko01100;path:ko01110;path:ko01120;path:ko01220 |
| orf3399 | K03497 | parB, spo0J     | http://www.genome.jp/dbget-bin/www_bget?ko:K03497 |                                                                                                                                                             |
| orf3406 | K03530 | hupB            | http://www.genome.jp/dbget-bin/www_bget?ko:K03530 |                                                                                                                                                             |
| orf3409 | K09958 | K09958          | http://www.genome.jp/dbget-bin/www_bget?ko:K09958 |                                                                                                                                                             |
| orf3411 | K07506 | K07506          | http://www.genome.jp/dbget-bin/www_bget?ko:K07506 |                                                                                                                                                             |
| orf3412 | K07120 | K07120          | http://www.genome.jp/dbget-bin/www_bget?ko:K07120 |                                                                                                                                                             |
| orf3415 | K03281 | TC.CIC          | http://www.genome.jp/dbget-bin/www_bget?ko:K03281 |                                                                                                                                                             |
| orf3416 | K03316 | TC.CPA1         | http://www.genome.jp/dbget-bin/www_bget?ko:K03316 |                                                                                                                                                             |
| orf3417 | K17686 | copA, ATP7      | http://www.genome.jp/dbget-bin/www_bget?ko:K17686 |                                                                                                                                                             |
| orf3422 | K00154 | E1.2.1.68       | http://www.genome.jp/dbget-bin/www_bget?ko:K00154 |                                                                                                                                                             |
| orf3423 | K07090 | K07090          | http://www.genome.jp/dbget-bin/www_bget?ko:K07090 |                                                                                                                                                             |
| orf3425 | K02484 | K02484          | http://www.genome.jp/dbget-bin/www_bget?ko:K02484 |                                                                                                                                                             |
| orf3427 | K15726 | czcA            | http://www.genome.jp/dbget-bin/www_bget?ko:K15726 |                                                                                                                                                             |
| orf3428 | K15727 | czcB            | http://www.genome.jp/dbget-bin/www_bget?ko:K15727 |                                                                                                                                                             |
| orf3431 | K00343 | nuoN            | http://www.genome.jp/dbget-bin/www_bget?ko:K00343 | path:ko00190;path:ko01100                                                                                                                                   |
| orf3433 | K01971 | E6.5.1.1, lig   | http://www.genome.jp/dbget-bin/www_bget?ko:K01971 | path:ko03410;path:ko03420;path:ko03430;path:ko03450                                                                                                         |
| orf3439 | K03736 | eutC            | http://www.genome.jp/dbget-bin/www_bget?ko:K03736 | path:ko00564;path:ko01100                                                                                                                                   |
| orf3440 | K03735 | eutB            | http://www.genome.jp/dbget-bin/www_bget?ko:K03735 | path:ko00564;path:ko01100                                                                                                                                   |
| orf3442 | K01114 | plcC            | http://www.genome.jp/dbget-bin/www_bget?ko:K01114 | path:ko00562;path:ko00564;path:ko00565;path:ko01100;path:ko04919                                                                                            |
| orf3455 | K03497 | parB, spo0J     | http://www.genome.jp/dbget-bin/www_bget?ko:K03497 |                                                                                                                                                             |
| orf3467 | K01057 | PGLS, pgl, devB | http://www.genome.jp/dbget-bin/www_bget?ko:K01057 | path:ko00030;path:ko01100;path:ko01110;path:ko01120;path:ko01200                                                                                            |

|         |        |                  |                                                   |                                                                                                                      |
|---------|--------|------------------|---------------------------------------------------|----------------------------------------------------------------------------------------------------------------------|
| orf3468 | K01807 | rpiA             | http://www.genome.jp/dbget-bin/www_bget?ko:K01807 | path:ko00030;path:ko00710;path:ko01100;path:ko01110;path:ko01120;path:ko01200;path:ko01230                           |
| orf3474 | K01620 | ltaE             | http://www.genome.jp/dbget-bin/www_bget?ko:K01620 | path:ko00260;path:ko01100;path:ko01110;path:ko01120;path:ko01230                                                     |
| orf3475 | K01338 | lon              | http://www.genome.jp/dbget-bin/www_bget?ko:K01338 | path:ko04112                                                                                                         |
| orf3478 | K06911 | K06911           | http://www.genome.jp/dbget-bin/www_bget?ko:K06911 |                                                                                                                      |
| orf3479 | K06911 | K06911           | http://www.genome.jp/dbget-bin/www_bget?ko:K06911 |                                                                                                                      |
| orf3482 | K03296 | TC.HAE1          | http://www.genome.jp/dbget-bin/www_bget?ko:K03296 |                                                                                                                      |
| orf3483 | K03585 | acrA             | http://www.genome.jp/dbget-bin/www_bget?ko:K03585 | path:ko00312                                                                                                         |
| orf3487 | K17677 | IRC3             | http://www.genome.jp/dbget-bin/www_bget?ko:K17677 |                                                                                                                      |
| orf3489 | K03497 | parB, spo0J      | http://www.genome.jp/dbget-bin/www_bget?ko:K03497 |                                                                                                                      |
| orf3493 | K01895 | ACSS, acs        | http://www.genome.jp/dbget-bin/www_bget?ko:K01895 | path:ko00010;path:ko00620;path:ko00640;path:ko00680;path:ko00720;path:ko01100;path:ko01110;path:ko01120;path:ko01200 |
| orf3494 | K07110 | K07110           | http://www.genome.jp/dbget-bin/www_bget?ko:K07110 |                                                                                                                      |
| orf3497 | K02069 | ABC.X2.P         | http://www.genome.jp/dbget-bin/www_bget?ko:K02069 |                                                                                                                      |
| orf3498 | K01689 | ENO, eno         | http://www.genome.jp/dbget-bin/www_bget?ko:K01689 | path:ko00010;path:ko00680;path:ko01100;path:ko01110;path:ko01120;path:ko01200;path:ko01230;path:ko03018;path:ko04066 |
| orf3501 | K09732 | K09732           | http://www.genome.jp/dbget-bin/www_bget?ko:K09732 |                                                                                                                      |
| orf3505 | K07132 | K07132           | http://www.genome.jp/dbget-bin/www_bget?ko:K07132 |                                                                                                                      |
| orf3510 | K07341 | doc              | http://www.genome.jp/dbget-bin/www_bget?ko:K07341 |                                                                                                                      |
| orf3522 | K05896 | scpA             | http://www.genome.jp/dbget-bin/www_bget?ko:K05896 |                                                                                                                      |
| orf3525 | K07494 | K07494           | http://www.genome.jp/dbget-bin/www_bget?ko:K07494 |                                                                                                                      |
| orf3527 | K07171 | K07171           | http://www.genome.jp/dbget-bin/www_bget?ko:K07171 |                                                                                                                      |
| orf3537 | K07497 | K07497           | http://www.genome.jp/dbget-bin/www_bget?ko:K07497 |                                                                                                                      |
| orf3543 | K00322 | sthA, udhA       | http://www.genome.jp/dbget-bin/www_bget?ko:K00322 | path:ko00760;path:ko01100                                                                                            |
| orf3544 | K07497 | K07497           | http://www.genome.jp/dbget-bin/www_bget?ko:K07497 |                                                                                                                      |
| orf3545 | K07062 | K07062           | http://www.genome.jp/dbget-bin/www_bget?ko:K07062 |                                                                                                                      |
| orf3546 | K07075 | K07075           | http://www.genome.jp/dbget-bin/www_bget?ko:K07075 |                                                                                                                      |
| orf3552 | K07062 | K07062           | http://www.genome.jp/dbget-bin/www_bget?ko:K07062 |                                                                                                                      |
| orf3560 | K12213 | icmK, traN, dotH | http://www.genome.jp/dbget-bin/www_bget?ko:K12213 |                                                                                                                      |
| orf3561 | K12209 | icmE, dotG       | http://www.genome.jp/dbget-bin/www_bget?ko:K12209 |                                                                                                                      |
| orf3566 | K09803 | K09803           | http://www.genome.jp/dbget-bin/www_bget?ko:K09803 |                                                                                                                      |
| orf3570 | K07483 | K07483           | http://www.genome.jp/dbget-bin/www_bget?ko:K07483 |                                                                                                                      |
| orf3574 | K07339 | K07339           | http://www.genome.jp/dbget-bin/www_bget?ko:K07339 |                                                                                                                      |
| orf3587 | K00558 | DNMT1, dcm       | http://www.genome.jp/dbget-bin/www_bget?ko:K00558 | path:ko00270;path:ko01100;path:ko05206                                                                               |
| orf3594 | K07088 | K07088           | http://www.genome.jp/dbget-bin/www_bget?ko:K07088 |                                                                                                                      |
| orf3598 | K03657 | uvrD, pcrA       | http://www.genome.jp/dbget-bin/www_bget?ko:K03657 | path:ko03420;path:ko03430                                                                                            |
| orf3602 | K02014 | TC.FEV.OM        | http://www.genome.jp/dbget-bin/www_bget?ko:K02014 |                                                                                                                      |
| orf3605 | K03832 | tonB             | http://www.genome.jp/dbget-bin/www_bget?ko:K03832 |                                                                                                                      |
| orf3606 | K07119 | K07119           | http://www.genome.jp/dbget-bin/www_bget?ko:K07119 |                                                                                                                      |
| orf3608 | K04650 | NCOR1, N-CoR     | http://www.genome.jp/dbget-bin/www_bget?ko:K04650 | path:ko04919;path:ko05202                                                                                            |
| orf3611 | K01561 | dehH             | http://www.genome.jp/dbget-bin/www_bget?ko:K01561 | path:ko00361;path:ko00625;path:ko01100;path:ko01120                                                                  |
| orf3625 | K00135 | gabD             | http://www.genome.jp/dbget-bin/www_bget?ko:K00135 | path:ko00250;path:ko00310;path:ko00350;path:ko00650;path:ko01100;path:ko01120                                        |
| orf3640 | K12218 | icmP, trbA       | http://www.genome.jp/dbget-bin/www_bget?ko:K12218 |                                                                                                                      |
| orf3641 | K12218 | icmP, trbA       | http://www.genome.jp/dbget-bin/www_bget?ko:K12218 |                                                                                                                      |
| orf3646 | K00077 | panE, apbA       | http://www.genome.jp/dbget-bin/www_bget?ko:K00077 | path:ko00770;path:ko01100;path:ko01110                                                                               |
| orf3661 | K12218 | icmP, trbA       | http://www.genome.jp/dbget-bin/www_bget?ko:K12218 |                                                                                                                      |
| orf3670 | K00425 | cydA             | http://www.genome.jp/dbget-bin/www_bget?ko:K00425 | path:ko00190;path:ko01100;path:ko02020                                                                               |
| orf3684 | K14162 | dnaE2            | http://www.genome.jp/dbget-bin/www_bget?ko:K14162 |                                                                                                                      |
| orf3685 | K12206 | icmB, dotO       | http://www.genome.jp/dbget-bin/www_bget?ko:K12206 |                                                                                                                      |
| orf3692 | K12206 | icmB, dotO       | http://www.genome.jp/dbget-bin/www_bget?ko:K12206 |                                                                                                                      |
| orf3694 | K07497 | K07497           | http://www.genome.jp/dbget-bin/www_bget?ko:K07497 |                                                                                                                      |
| orf3698 | K12204 | dotC, traI       | http://www.genome.jp/dbget-bin/www_bget?ko:K12204 |                                                                                                                      |
| orf3700 | K12217 | icmO, trbC, dotL | http://www.genome.jp/dbget-bin/www_bget?ko:K12217 |                                                                                                                      |
|         |        |                  |                                                   |                                                                                                                      |
|         |        |                  |                                                   |                                                                                                                      |

**Fig. S1-KEEG pathway of starch and sucrose metabolism**

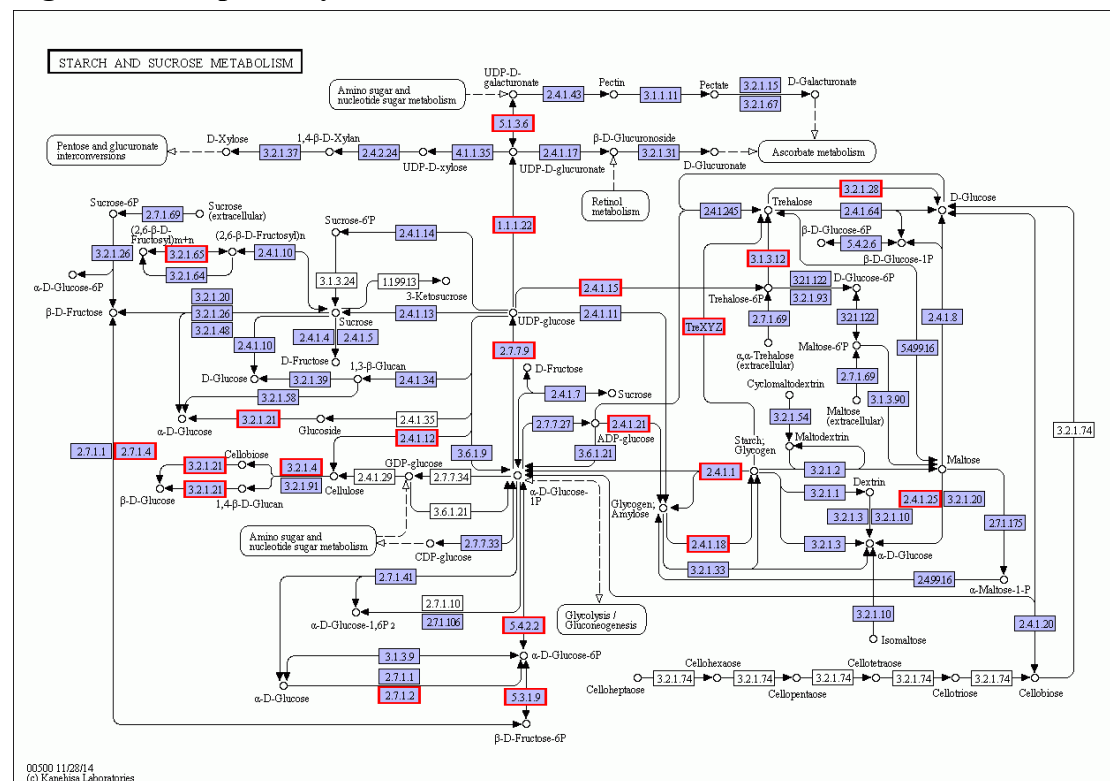

Note: It is worthy to note that the red boxes indicate the presence of enzymes in *Komagataeibacter* sp. W1.

**Fig. S2-Cellulose hydrolysis by  $\beta$ -Glucosidase, Cellobiosidase I/II and Endo-1,4- $\beta$ -D-Glucanase.**

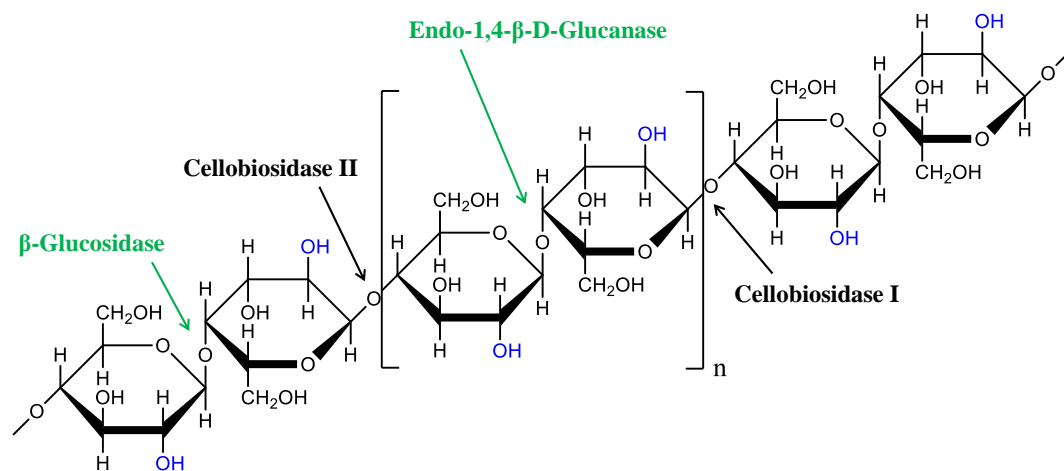

Note: It is worthy to note that only those genes encoding  $\beta$ -Glucosidase and Endo-1,4- $\beta$ -D-Glucanase were found in *Komagataeibacter* sp. W1.
